# Supplementary material for: Diverse synthesis of functionalized hydroquinoline derivatives from α-aryl vinylsulfonium salts
Source: Royal Society of Chemistry journal article supplement (doi:10.1039/d3qo00784g), 2023-01-01

# Supporting Information

## Diverse Synthesis of Functionalized Hydroquinoline Derivatives from $\alpha$ -Aryl Vinylsulfonium Salts

Zhen-Hua Wang,\* Tong Zhang, Qing-Fei Yan, Jian-Qiang Zhao, Yong You, Yan-Ping Zhang, Jun-Qing Yin, and Wei-Cheng Yuan\*

---

Innovation Research Center of Chiral Drugs, Institute for Advanced Study, Chengdu University,  
Chengdu 610106, China

wangzhenhua@cdu.edu.cn

yuanwc@cioc.ac.cn

### Table of Contents

|                                                                                                                                           |     |
|-------------------------------------------------------------------------------------------------------------------------------------------|-----|
| 1. General experimental information.....                                                                                                  | S1  |
| 2. Table S1 Optimization of conditions for the synthesis of <b>3a</b> .....                                                               | S1  |
| 3. General procedure for the synthesis of the product <b>3</b> .....                                                                      | S2  |
| 4. Procedure for the synthesis of spiro-cyclopropane-oxindole-fused tetrahydroquinolines <b>6</b> .....                                   | S8  |
| 5. Procedure for the synthesis of epoxypropane-fused tetrahydroquinolines <b>8</b> .....                                                  | S14 |
| 6. Procedure for the synthesis of 3-phenylquinoline <b>9</b> .....                                                                        | S18 |
| 7. Procedure for the synthesis of 3-phenyl-1-tosyl-1,2,3,4-tetrahydroquinoline <b>10</b> .....                                            | S19 |
| 8. Procedure for the synthesis of 3,7-diphenyl-1-tosyl-1,2,3,4-tetrahydroquinoline <b>11</b> .....                                        | S19 |
| 9. Crystal data and structure refinement.....                                                                                             | S20 |
| 10. <sup>1</sup> H, <sup>13</sup> C NMR spectra for compounds <b>3</b> , <b>6</b> , <b>8</b> , <b>9</b> , <b>10</b> , and <b>11</b> ..... | S23 |

## 1. General experimental information

Reagents were purchased from commercial sources and were used as received unless mentioned otherwise. Reactions were monitored by TLC. The NMR spectra were recorded by Bruker Avance NEO 400 or 300.  $^1\text{H}$  NMR and  $^{13}\text{C}$  NMR spectra were recorded in  $\text{CDCl}_3$  or  $\text{DMSO}-d_6$ .  $^1\text{H}$  NMR chemical shifts are reported in ppm relative to tetramethylsilane (TMS) with the solvent resonance employed as the internal standard ( $\text{CDCl}_3$  at 7.26 ppm,  $\text{DMSO}-d_6$  at 2.50 ppm). Data are reported as follows: chemical shift, multiplicity (s = singlet, br s = broad singlet, d = doublet, t = triplet, q = quartet, m = multiplet), coupling constants (Hz) and integration.  $^{13}\text{C}$  NMR chemical shifts are reported in ppm from tetramethylsilane (TMS) with the solvent resonance as the internal standard ( $\text{CDCl}_3$  at 77.16 ppm,  $\text{DMSO}-d_6$  at 39.52 ppm). The melting points of the products were determined by the OptiMelt melting point apparatus. The HRMS were recorded by Agilent 6545 LC/Q-TOF mass spectrometer.

## 2. Table S1 Optimization of conditions for the synthesis of 3a

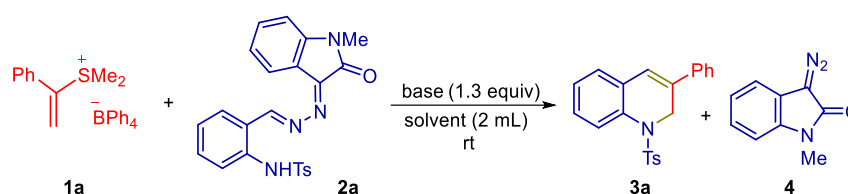

| entry           | base                                              | solvent                | temp. (°C) | time (h) | yield (%) <sup>b</sup> |
|-----------------|---------------------------------------------------|------------------------|------------|----------|------------------------|
| 1               | $\text{Et}_3\text{N}$                             | DCM                    | 25         | 28       | 34                     |
| 2               | DABCO                                             | DCM                    | 25         | 28       | 7                      |
| 3               | DBU                                               | DCM                    | 25         | 1.0      | 95                     |
| 4               | TMG                                               | DCM                    | 25         | 2.5      | 66                     |
| 5               | $\text{K}_2\text{CO}_3$                           | DCM                    | 25         | 10       | 97                     |
| 6               | $\text{Cs}_2\text{CO}_3$                          | DCM                    | 25         | 1.0      | 98                     |
| 7               | <i>t</i> -BuOK                                    | DCM                    | 25         | 2.5      | 63                     |
| 8               | $\text{K}_3\text{PO}_4 \cdot 7\text{H}_2\text{O}$ | DCM                    | 25         | 1.5      | 93                     |
| 9               | $\text{Cs}_2\text{CO}_3$                          | THF                    | 25         | 1.0      | 91                     |
| 10              | $\text{Cs}_2\text{CO}_3$                          | $\text{CH}_3\text{CN}$ | 25         | 1.0      | 90                     |
| 11              | $\text{Cs}_2\text{CO}_3$                          | toluene                | 25         | 1.0      | 99                     |
| 12              | $\text{Cs}_2\text{CO}_3$                          | MTBE                   | 25         | 9.0      | 85                     |
| 13              | $\text{Cs}_2\text{CO}_3$                          | EtOAc                  | 25         | 0.5      | 62                     |
| 14              | $\text{Cs}_2\text{CO}_3$                          | MeOH                   | 25         | 1.0      | n.p.                   |
| 15 <sup>c</sup> | $\text{Cs}_2\text{CO}_3$                          | toluene                | 25         | 1.0      | 97                     |
| 16 <sup>d</sup> | $\text{Cs}_2\text{CO}_3$                          | toluene                | 25         | 1.0      | 98                     |
| 17 <sup>e</sup> | $\text{Cs}_2\text{CO}_3$                          | toluene                | 25         | 1.5      | 98                     |
| 18 <sup>f</sup> | $\text{Cs}_2\text{CO}_3$                          | toluene                | 40         | 1.0      | 98                     |

<sup>a</sup>Unless otherwise noted, the reactions were carried out with **1a** (0.24 mmol), **2** (0.18 mmol) and base (0.24 mmol) in 2 mL specified solvent at room temperature for the indicated time; <sup>b</sup> Isolated yield; <sup>c</sup> 1.6 equiv  $\text{Cs}_2\text{CO}_3$  was used. <sup>d</sup>2.1 equiv  $\text{Cs}_2\text{CO}_3$  was used. <sup>e</sup>1.1 equiv  $\text{Cs}_2\text{CO}_3$  was used. <sup>f</sup>The reaction was conducted at 40 °C. n.p. = no product.

### 3. General procedure for the synthesis of the product 3

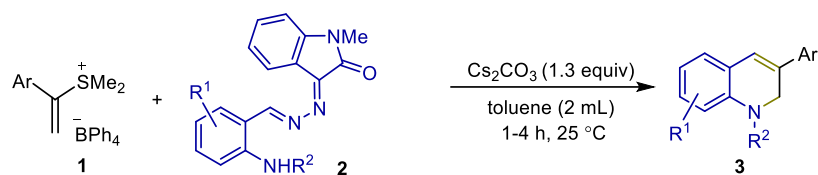

Substrate **1** (0.24 mmol), substrate **2** (0.18 mmol), Cs<sub>2</sub>CO<sub>3</sub> (0.24 mmol) and 2.0 mL of toluene were successively added to a vial. The resulting mixture was stirred at room temperature for indicated time. After completion of the reaction (monitored by TLC), the reaction mixture was directly subjected to flash column chromatography (petroleum ether/ethyl acetate/dichloromethane (10:1:1)) on silica gel to afford the corresponding product **3**.

#### 3-phenyl-1-tosyl-1,2-dihydroquinoline (3a)

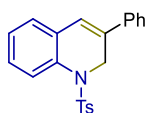

White solid, 66.7 mg, 99% yield; m.p. 186.1 – 186.5 °C

**<sup>1</sup>H NMR (300 MHz, CDCl<sub>3</sub>)** δ 7.83 – 7.75 (m, 1H), 7.44 – 7.33 (m, 3H), 7.33 – 7.29 (m, 2H), 7.28 – 7.21 (m, 2H), 7.18 (d, *J* = 8.2 Hz, 2H), 7.10-7.01 (m, 1H), 6.93 (d, *J* = 8.4 Hz, 2H), 6.33 (s, 1H), 4.82 (s, 2H), 2.30 (s, 3H).

**<sup>13</sup>C NMR (75 MHz, CDCl<sub>3</sub>)** δ 143.5, 137.5, 135.8, 134.6, 134.4, 130.6, 129.0, 128.8, 128.3, 128.0, 127.2, 127.1, 127.0, 126.9, 125.2, 121.4, 47.7, 21.6.

**HRMS (ESI)** *m/z*: [M + Na]<sup>+</sup> Calcd. for C<sub>22</sub>H<sub>19</sub>NO<sub>2</sub>SNa 384.1029; found: 384.1022.

#### 6-methyl-3-phenyl-1-tosyl-1,2-dihydroquinoline (3b)

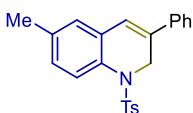

White solid, 69.3 mg, 98% yield; m.p. 139.5 – 104.7 °C

**<sup>1</sup>H NMR (300 MHz, CDCl<sub>3</sub>)** δ 7.65 (d, *J* = 8.1 Hz, 1H), 7.42 – 7.29 (m, 3H), 7.28 – 7.21 (m, 2H), 7.17 (d, *J* = 8.2 Hz, 2H), 7.14 – 7.07 (m, 1H), 6.91 (d, *J* = 8.0 Hz, 2H), 6.84 (s, 1H), 6.26 (s, 1H), 4.77 (s, 2H), 2.34 (s, 3H), 2.28 (s, 3H).

**<sup>13</sup>C NMR (75 MHz, CDCl<sub>3</sub>)** δ 143.3, 137.6, 136.8, 135.7, 134.4, 131.8, 130.3, 128.9, 128.7, 128.2, 127.5, 127.2, 126.6, 125.2, 121.4, 47.7, 21.5, 21.1.

**HRMS (ESI)** *m/z*: [M + Na]<sup>+</sup> Calcd. for C<sub>23</sub>H<sub>21</sub>NO<sub>2</sub>SNa 398.1185; found: 398.1204

#### 6-chloro-3-phenyl-1-tosyl-1,2-dihydroquinoline (3c)

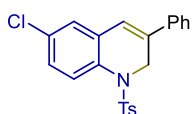

White solid, 73.0 mg, 98% yield; m.p. 108.1 – 109.0 °C

**<sup>1</sup>H NMR (300 MHz, CDCl<sub>3</sub>)** δ 7.70 (d, *J* = 8.6 Hz, 1H), 7.42 – 7.30 (m, 3H), 7.29 – 7.21 (m, 3H), 7.18 (d, *J* = 8.2 Hz, 2H), 7.01 (d, *J* = 2.2 Hz, 1H), 6.94 (d, *J* = 8.2 Hz, 2H), 6.24 (s, 1H), 4.78 (s, 2H), 2.29 (s, 3H).

$^{13}\text{C}$  NMR (75 MHz,  $\text{CDCl}_3$ )  $\delta$  143.7, 137.0, 136.1, 135.5, 132.8, 132.4, 131.9, 129.1, 128.8, 128.7, 128.1, 127.7, 127.1, 126.6, 125.3, 120.2, 47.6, 21.6.

HRMS (ESI)  $m/z$ :  $[\text{M} + \text{Na}]^+$  Calcd. for  $\text{C}_{22}\text{H}_{18}\text{ClNO}_2\text{SNa}$  418.0639, 420.0616; found: 418.0650, 420.0628.

#### 6-bromo-3-phenyl-1-tosyl-1,2-dihydroquinoline (3d)

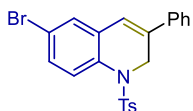

White solid, 82.9 mg, 99% yield; m.p. 119.0 – 119.9 °C

$^1\text{H}$  NMR (300 MHz,  $\text{CDCl}_3$ )  $\delta$  7.64 (d,  $J = 8.6$  Hz, 1H), 7.43 – 7.29 (m, 4H), 7.29 – 7.22 (m, 2H), 7.22 – 7.13 (m, 3H), 6.95 (d,  $J = 8.0$  Hz, 2H), 6.24 (s, 1H), 4.78 (s, 2H), 2.29 (s, 3H).

$^{13}\text{C}$  NMR (75 MHz,  $\text{CDCl}_3$ )  $\delta$  143.8, 137.0, 136.1, 135.5, 133.3, 132.2, 130.6, 129.6, 129.1, 128.8, 128.7, 128.4, 127.1, 125.3, 120.4, 120.0, 47.5, 21.6.

HRMS (ESI)  $m/z$ :  $[\text{M} + \text{Na}]^+$  Calcd. for  $\text{C}_{22}\text{H}_{18}\text{BrNO}_2\text{SNa}$  462.0134, 464.0115; found: 462.0132, 464.0115.

#### 7-chloro-3-phenyl-1-tosyl-1,2-dihydroquinoline (3e)

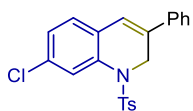

White solid, 73.4 mg, 99% yield; m.p. 186.0 – 186.9 °C

$^1\text{H}$  NMR (300 MHz,  $\text{CDCl}_3$ )  $\delta$  7.79 (d,  $J = 1.6$  Hz, 1H), 7.44 – 7.30 (m, 3H), 7.29 – 7.12 (m, 5H), 6.95 (t,  $J = 7.3$  Hz, 3H), 6.29 (s, 1H), 4.78 (s, 2H), 2.29 (s, 3H).

$^{13}\text{C}$  NMR (75 MHz,  $\text{CDCl}_3$ )  $\delta$  143.8, 137.1, 135.6, 135.3, 134.8, 133.0, 129.1, 128.9, 128.8, 128.6, 127.8, 127.1, 126.8, 125.2, 120.4, 47.5, 21.6.

HRMS (ESI)  $m/z$ :  $[\text{M} + \text{Na}]^+$  Calcd. for  $\text{C}_{22}\text{H}_{18}\text{ClNO}_2\text{SNa}$  418.0639, 420.0616; found: 418.0661, 420.0639.

#### 7-bromo-3-phenyl-1-tosyl-1,2-dihydroquinoline (3f)

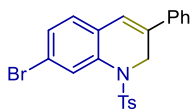

White solid, 83.0 mg, 99% yield; m.p. 265.7 – 166.5 °C

$^1\text{H}$  NMR (400 MHz,  $\text{CDCl}_3$ )  $\delta$  7.96 (s, 1H), 7.43 – 7.33 (m, 4H), 7.30 – 7.26 (m, 2H), 7.23 (d,  $J = 8.3$  Hz, 2H), 6.97 (d,  $J = 8.3$  Hz, 2H), 6.92 (d,  $J = 8.2$  Hz, 1H), 6.30 (s, 1H), 4.79 (s, 2H), 2.32 (s, 3H).

$^{13}\text{C}$  NMR (101 MHz,  $\text{CDCl}_3$ )  $\delta$  143.8, 137.1, 135.6, 135.5, 135.1, 130.1, 129.6, 129.4, 129.1, 128.8, 128.6, 128.1, 127.1, 125.2, 120.8, 120.4, 47.5, 21.6.

HRMS (ESI)  $m/z$ :  $[\text{M} + \text{Na}]^+$  Calcd. for  $\text{C}_{22}\text{H}_{18}\text{BrNO}_2\text{SNa}$  462.0134, 464.0115; found: 462.0156, 464.0140.

#### 8-methyl-3-phenyl-1-tosyl-1,2-dihydroquinoline (3g)

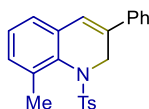

White solid, 68.6 mg, 97% yield; m.p. 147.9 – 148.7 °C

**<sup>1</sup>H NMR (300 MHz, CDCl<sub>3</sub>)** δ 7.37 – 7.28 (m, 3H), 7.27 – 7.21 (m, 1H), 7.21 – 7.11 (m, 5H), 6.91 (d, *J* = 8.0 Hz, 2H), 6.88 – 6.83 (m, 1H), 6.19 (d, *J* = 2.4 Hz, 1H), 5.13 (d, *J* = 17.6 Hz, 1H), 4.23 (dd, *J* = 17.6, 2.4 Hz, 1H), 2.65 (s, 3H), 2.31 (s, 3H).

**<sup>13</sup>C NMR (75 MHz, CDCl<sub>3</sub>)** δ 143.4, 137.7, 137.4, 135.7, 135.1, 133.2, 131.9, 130.9, 128.8, 128.6, 128.2, 127.7, 127.4, 124.9, 124.6, 122.1, 48.5, 21.5, 19.6.

**HRMS (ESI)** m/z: [M + Na]<sup>+</sup> Calcd. for C<sub>23</sub>H<sub>21</sub>NO<sub>2</sub>SNa 398.1185; found: 398.1202.

### 3-phenyl-1-(phenylsulfonyl)-1,2-dihydroquinoline (3h)

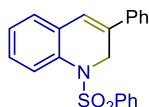

White solid, 64.2 mg, 99% yield; m.p. 141.4 – 142.1 °C

**<sup>1</sup>H NMR (400 MHz, CDCl<sub>3</sub>)** δ 7.81 (d, *J* = 7.9 Hz, 1H), 7.45 – 7.37 (m, 3H), 7.37 – 7.30 (m, 3H), 7.29 – 7.23 (m, 4H), 7.15 (t, *J* = 7.9 Hz, 2H), 7.05 (dd, *J* = 7.5, 1.3 Hz, 1H), 6.30 (s, 1H), 4.83 (s, 2H).

**<sup>13</sup>C NMR (101 MHz, CDCl<sub>3</sub>)** δ 138.5, 137.4, 134.6, 134.2, 132.7, 130.6, 128.8, 128.4, 128.3, 128.0, 127.2, 127.1, 127.0, 126.9, 125.2, 121.2, 47.7.

**HRMS (ESI)** m/z: [M + Na]<sup>+</sup> Calcd. for C<sub>21</sub>H<sub>17</sub>NO<sub>2</sub>SNa 370.0872; found: 370.0878.

### 1-(methylsulfonyl)-3-phenyl-1,2-dihydroquinoline (3i)

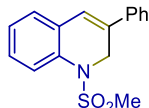

White solid, 43.2 mg, 82% yield; m.p. 129.1 – 130.0 °C

**<sup>1</sup>H NMR (300 MHz, CDCl<sub>3</sub>)** δ 7.71 – 7.61 (m, 1H), 7.60 – 7.53 (m, 2H), 7.49 – 7.41 (m, 2H), 7.41 – 7.34 (m, 1H), 7.33 – 7.27 (m, 3H), 6.95 (s, 1H), 4.78 (s, 2H), 2.64 (s, 3H).

**<sup>13</sup>C NMR (75 MHz, CDCl<sub>3</sub>)** δ 137.1, 135.7, 134.5, 129.9, 129.1, 128.7, 128.4, 127.4, 127.2, 126.4, 125.4, 122.0, 47.4, 37.6.

**HRMS (ESI)** m/z: [M+Na]<sup>+</sup> Calcd. for C<sub>16</sub>H<sub>15</sub>N<sub>2</sub>O<sub>2</sub>SNa 308.0716; found: 308.0719.

### 3-phenyl-1-(propylsulfonyl)-1,2-dihydroquinoline (3j)

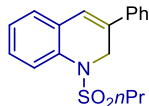

White solid, 51.0 mg, 88% yield; m.p. 86.2 – 87.0 °C

**<sup>1</sup>H NMR (400 MHz, CDCl<sub>3</sub>)** δ 7.75 – 7.69 (m, 1H), 7.61 – 7.55 (m, 2H), 7.51 – 7.44 (m, 2H), 7.42 – 7.36 (m, 1H), 7.33 – 7.27 (m, 3H), 6.96 (s, 1H), 4.79 (s, 2H), 2.81 – 2.73 (m, 2H), 1.76 – 1.65 (m, 2H), 0.89 (t, *J* = 7.5 Hz, 3H).

**<sup>13</sup>C NMR (101 MHz, CDCl<sub>3</sub>)** δ 137.1, 136.1, 134.7, 129.8, 129.1, 128.7, 128.3, 127.4, 126.7, 125.6, 125.4, 122.0, 52.9, 47.3, 17.0, 13.1.

**HRMS (ESI)** m/z: [M + Na]<sup>+</sup> Calcd. for C<sub>18</sub>H<sub>19</sub>NO<sub>2</sub>SNa 336.1029; found: 336.1030

### benzyl 3-phenylquinoline-1(2H)-carboxylate (3k)

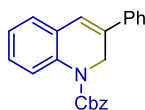

Colorless oil, 49.9 mg, 78% yield.

**<sup>1</sup>H NMR (400 MHz, CDCl<sub>3</sub>)** δ 7.74 – 7.63 (m, 1H), 7.58 (d, *J* = 7.5 Hz, 2H), 7.47 – 7.35 (m, 8H), 7.31 – 7.21 (m, 2H), 7.21 – 7.14 (m, 1H), 6.90 (s, 1H), 5.32 (s, 2H), 4.87 (s, 2H).

**<sup>13</sup>C NMR (101 MHz, CDCl<sub>3</sub>)** δ 177.0, 154.2, 137.6, 136.2, 135.7, 128.9, 128.8, 128.7, 128.3, 128.2, 128.1, 127.4, 127.0, 125.3, 124.8, 123.6, 122.1, 68.0, 45.6.

**HRMS (ESI)** *m/z*: [M+Na]<sup>+</sup> Calcd. for C<sub>23</sub>H<sub>19</sub>NO<sub>2</sub>Na 364.1308; found: 364.1310.

### 3-(*p*-tolyl)-1-tosyl-1,2-dihydroquinoline (3l)

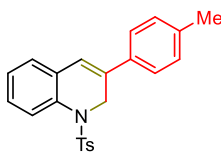

White solid, 69.4 mg, 99% yield; m.p. 149.0 – 149.8 °C

**<sup>1</sup>H NMR (300 MHz, CDCl<sub>3</sub>)** δ 7.77 (d, *J* = 7.9 Hz, 1H), 7.34 – 7.25 (m, 1H), 7.25 – 7.20 (m, 1H), 7.20 – 7.13 (m, 6H), 7.07 – 6.99 (m, 1H), 6.92 (d, *J* = 8.0 Hz, 2H), 6.27 (s, 1H), 4.78 (s, 2H), 2.38 (s, 3H), 2.28 (s, 3H).

**<sup>13</sup>C NMR (75 MHz, CDCl<sub>3</sub>)** δ 143.4, 138.3, 135.7, 134.6, 134.2, 130.7, 129.5, 128.9, 127.7, 127.1, 127.0, 126.9, 126.8, 125.1, 120.5, 47.6, 21.5, 21.3.

**HRMS (ESI)** *m/z*: [M + Na]<sup>+</sup> Calcd. for C<sub>23</sub>H<sub>21</sub>NO<sub>2</sub>SNa 398.1185; found: 398.1191.

### 3-(4-methoxyphenyl)-1-tosyl-1,2-dihydroquinoline (3m)

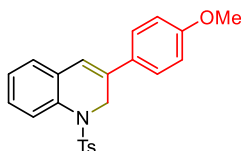

White solid, 68.9 mg, 94% yield; m.p. 132.0 – 132.9 °C

**<sup>1</sup>H NMR (300 MHz, CDCl<sub>3</sub>)** δ 7.75 (d, *J* = 7.7 Hz, 1H), 7.33 – 7.19 (m, 4H), 7.18 – 7.12 (m, 2H), 7.00 (dd, *J* = 7.4, 1.4 Hz, 1H), 6.95 – 6.86 (m, 4H), 6.21 (s, 1H), 4.75 (s, 2H), 3.84 (s, 3H), 2.27 (s, 3H).

**<sup>13</sup>C NMR (75 MHz, CDCl<sub>3</sub>)** δ 159.8, 143.4, 135.7, 134.2, 134.0, 130.8, 130.0, 128.9, 127.5, 127.1, 127.0, 126.8, 126.5, 119.5, 114.1, 55.4, 47.6, 21.6.

**HRMS (ESI)** *m/z*: [M + Na]<sup>+</sup> Calcd. for C<sub>23</sub>H<sub>21</sub>NO<sub>3</sub>SNa 414.1134; found: 414.1143.

### 3-(4-(*tert*-butyl)phenyl)-1-tosyl-1,2-dihydroquinoline (3n)

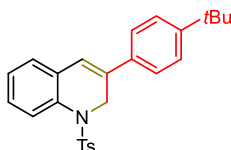

White solid, 77.2 mg, 99% yield; m.p. 174.0 – 174.8 °C

**<sup>1</sup>H NMR (300 MHz, CDCl<sub>3</sub>)** δ 7.78 (d, *J* = 7.8 Hz, 1H), 7.40 (d, *J* = 8.5 Hz, 2H), 7.34 – 7.16 (m, 6H), 7.06 – 6.98 (m, 1H), 6.92 (d, *J* = 8.1 Hz, 2H), 6.30 (s, 1H), 4.80 (s, 2H), 2.29 (s, 3H), 1.37 (s, 9H).  
**<sup>13</sup>C NMR (75 MHz, CDCl<sub>3</sub>)** δ 151.5, 143.4, 135.7, 134.7, 134.6, 134.2, 130.7, 128.9, 127.7, 127.2, 127.0, 126.7, 125.7, 125.0, 120.6, 47.7, 34.8, 31.4, 21.6.  
**HRMS (ESI)** *m/z*: [M + Na]<sup>+</sup> Calcd. for C<sub>26</sub>H<sub>27</sub>NO<sub>2</sub>SNa 440.1655; found: 440.1664.

### 3-(4-fluorophenyl)-1-tosyl-1,2-dihydroquinoline (3o)

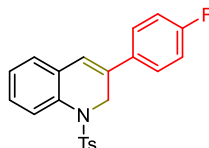

White solid, 70.4 mg, 99% yield; m.p. 141.1 – 142.0 °C  
**<sup>1</sup>H NMR (300 MHz, CDCl<sub>3</sub>)** δ 7.76 (d, *J* = 7.9 Hz, 1H), 7.36 – 7.18 (m, 4H), 7.14 (d, *J* = 8.2 Hz, 2H), 7.10 – 6.99 (m, 3H), 6.92 (d, *J* = 8.3 Hz, 2H), 6.25 (s, 1H), 4.75 (s, 2H), 2.28 (s, 3H).  
**<sup>13</sup>C NMR (75 MHz, CDCl<sub>3</sub>)** δ 162.7 (d, *J* = 246.9 Hz), 143.5, 135.7, 134.2, 133.7 (d, *J* = 3.2 Hz), 133.4, 130.4, 128.9, 128.0, 127.1, 127.0, 126.9, 126.8, 121.2, 115.8 (d, *J* = 21.5 Hz), 47.6, 21.6.  
**HRMS (ESI)** *m/z*: [M + Na]<sup>+</sup> Calcd. for C<sub>22</sub>H<sub>18</sub>FNO<sub>2</sub>SNa 402.0934; found: 402.0938.

### 3-(4-chlorophenyl)-1-tosyl-1,2-dihydroquinoline (3p)

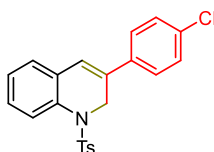

White solid, 71.6 mg, 96% yield; m.p. 189.9 – 190.9 °C  
**<sup>1</sup>H NMR (300 MHz, CDCl<sub>3</sub>)** δ 7.76 (d, *J* = 7.8 Hz, 1H), 7.38-7.27 (m, 3H), 7.25 – 7.09 (m, 5H), 7.03 (d, *J* = 7.4 Hz, 1H), 6.92 (d, *J* = 8.0 Hz, 2H), 6.29 (s, 1H), 4.74 (s, 2H), 2.28 (s, 3H).  
**<sup>13</sup>C NMR (75 MHz, CDCl<sub>3</sub>)** δ 143.6, 135.9, 135.6, 134.3, 134.1, 133.2, 130.2, 129.0, 128.2, 127.2, 127.1, 127.0, 126.9, 126.4, 121.8, 47.4, 21.5.  
**HRMS (ESI)** *m/z*: [M + Na]<sup>+</sup> Calcd. for C<sub>22</sub>H<sub>18</sub>ClNO<sub>2</sub>SNa 418.0639, 420.0616; found: 418.0644, 420.0622.

### 3-(3-fluorophenyl)-1-tosyl-1,2-dihydroquinoline (3q)

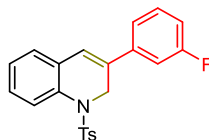

White solid, 70.3 mg, 98% yield; m.p. 167.2 – 167.9 °C  
**<sup>1</sup>H NMR (400 MHz, CDCl<sub>3</sub>)** δ 7.76 (d, *J* = 7.9 Hz, 1H), 7.39 – 7.28 (m, 2H), 7.23 (td, *J* = 7.5, 1.1 Hz, 1H), 7.15 (d, *J* = 8.3 Hz, 2H), 7.09 – 6.97 (m, 3H), 6.96 – 6.84 (m, 3H), 6.32 (s, 1H), 4.75 (s, 2H), 2.29 (s, 3H).  
**<sup>13</sup>C NMR (101 MHz, CDCl<sub>3</sub>)** δ 163.1 (d, *J* = 247.2 Hz), 143.7, 139.7 (d, *J* = 7.7 Hz), 135.7, 134.5, 133.2, 133.2, 130.3 (d, *J* = 8.5 Hz), 130.1, 129.0, 128.4, 127.3, 127.1, 126.9, 122.4, 120.8 (d, *J* = 2.8 Hz), 115.1 (d, *J* = 21.4 Hz), 112.0 (d, *J* = 22.3 Hz), 47.5, 21.5.  
**HRMS (ESI)** *m/z*: [M + Na]<sup>+</sup> Calcd. for C<sub>22</sub>H<sub>18</sub>FNO<sub>2</sub>SNa 402.0934; found: 402.0939.

### 3-(3-chlorophenyl)-1-tosyl-1,2-dihydroquinoline (3r)

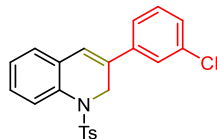

White solid, 74.0 mg, 99% yield; m.p. 153.4 – 154.1 °C

**<sup>1</sup>H NMR (300 MHz, CDCl<sub>3</sub>)**  $\delta$  7.76 (d,  $J$  = 7.9 Hz, 1H), 7.37 – 7.20 (m, 4H), 7.18 – 7.09 (m, 4H), 7.07 – 7.02 (m, 1H), 6.94 (d,  $J$  = 8.0 Hz, 2H), 6.31 (s, 1H), 4.73 (d,  $J$  = 1.3 Hz, 2H), 2.31 (s, 3H).

**<sup>13</sup>C NMR (75 MHz, CDCl<sub>3</sub>)**  $\delta$  143.7, 139.3, 135.7, 134.7, 134.5, 133.0, 130.0, 129.0, 128.4, 128.2, 127.3, 127.2, 127.1, 127.0, 125.4, 123.2, 122.5, 47.4, 21.6.

**HRMS (ESI)** m/z: [M + Na]<sup>+</sup> Calcd. for C<sub>22</sub>H<sub>18</sub>ClNO<sub>2</sub>SNa 418.0639, 420.0616; found: 418.0646, 420.0623.

### 3-(3-bromophenyl)-1-tosyl-1,2-dihydroquinoline (3s)

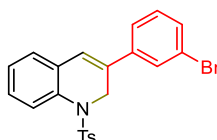

White solid, 81.6 mg, 99% yield; m.p. 139.5 – 140.3 °C

**<sup>1</sup>H NMR (300 MHz, CDCl<sub>3</sub>)**  $\delta$  7.75 (d,  $J$  = 7.8 Hz, 1H), 7.42 (d,  $J$  = 7.2 Hz, 1H), 7.37 – 7.28 (m, 1H), 7.28 – 7.20 (m, 3H), 7.19 – 7.09 (m, 3H), 7.04 (d,  $J$  = 7.4 Hz, 1H), 6.94 (d,  $J$  = 8.0 Hz, 2H), 6.29 (s, 1H), 4.72 (s, 2H), 2.31 (s, 3H).

**<sup>13</sup>C NMR (75 MHz, CDCl<sub>3</sub>)**  $\delta$  143.7, 139.6, 135.7, 134.4, 132.9, 131.1, 130.3, 130.0, 129.0, 128.4, 128.3, 127.3, 127.1, 127.0, 126.9, 123.7, 122.9, 122.5, 47.4, 21.6.

**HRMS (ESI)** m/z: [M + Na]<sup>+</sup> Calcd. for C<sub>22</sub>H<sub>18</sub>BrNO<sub>2</sub>SNa 462.0134, 464.0115; found: 462.0137, 464.0118.

### 3-([1,1'-biphenyl]-4-yl)-1-tosyl-1,2-dihydroquinoline (3t)

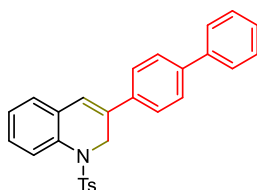

White solid, 73.7 mg, 90% yield; m.p. 185.2 – 186.1 °C

**<sup>1</sup>H NMR (300 MHz, CDCl<sub>3</sub>)**  $\delta$  7.83 (d,  $J$  = 7.8 Hz, 1H), 7.65 (t,  $J$  = 7.5 Hz, 4H), 7.50 (t,  $J$  = 7.5 Hz, 2H), 7.45 – 7.30 (m, 4H), 7.30 – 7.19 (m, 3H), 7.08 (d,  $J$  = 7.4 Hz, 1H), 6.96 (d,  $J$  = 8.0 Hz, 2H), 6.40 (s, 1H), 4.86 (s, 2H), 2.31 (s, 3H).

**<sup>13</sup>C NMR (75 MHz, CDCl<sub>3</sub>)**  $\delta$  143.5, 141.0, 140.3, 136.3, 135.7, 134.3, 134.1, 130.5, 129.0, 128.9, 128.0, 127.7, 127.3, 127.2, 127.1, 127.0, 126.9, 126.8, 125.6, 121.2, 47.5, 21.6.

**HRMS (ESI)** m/z: [M+Na]<sup>+</sup> Calcd. for C<sub>28</sub>H<sub>23</sub>NO<sub>2</sub>SNa 460.1342; found: 460.1347.

### 3-(naphthalen-2-yl)-1-tosyl-1,2-dihydroquinoline (3u)



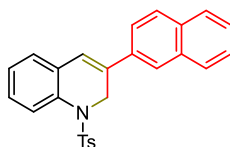

White solid, 76.8 mg, 99% yield; m.p. 144.0 – 144.9 °C

<sup>1</sup>H NMR (300 MHz, CDCl<sub>3</sub>) δ 7.89 – 7.75 (m, 4H), 7.71 (s, 1H), 7.56 – 7.44 (m, 2H), 7.37 – 7.26 (m, 2H), 7.26 – 7.19 (m, 1H), 7.15 (d, *J* = 8.2 Hz, 2H), 7.09 – 7.02 (m, 1H), 6.85 (d, *J* = 8.1 Hz, 2H), 6.44 (s, 1H), 4.90 (s, 2H), 2.24 (s, 3H).

<sup>13</sup>C NMR (75 MHz, CDCl<sub>3</sub>) δ 143.5, 135.7, 134.5, 134.4, 134.2, 133.4, 133.1, 130.5, 128.9, 128.4, 128.3, 128.0, 127.7, 127.2, 127.1, 126.9, 126.7, 126.5, 124.2, 123.0, 121.7, 47.5, 21.5.

HRMS (ESI) *m/z*: [M+Na]<sup>+</sup> Calcd. for C<sub>26</sub>H<sub>21</sub>NO<sub>2</sub>SNa 434.1185; found: 434.1193.

#### 4. Procedure for the synthesis of spiro-cyclopropane-oxindole-fused tetrahydroquinolines **6**

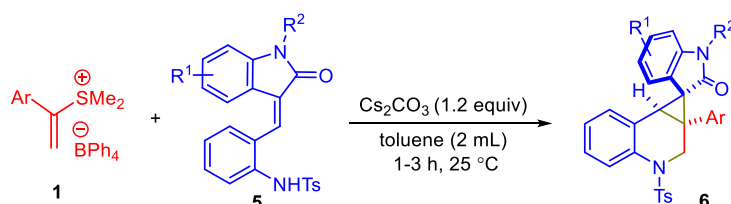

Substrate **1** (0.24 mmol), substrate **5** (0.20 mmol), Cs<sub>2</sub>CO<sub>3</sub> (0.24 mmol) and 2.0 mL of toluene were successively added to a vial. The resulting mixture was stirred at room temperature for indicated time. After completion of the reaction (monitored by TLC), the reaction mixture was directly subjected to flash column chromatography (petroleum ether/ethyl acetate/dichloromethane (10:1:1)) on silica gel to afford the corresponding product **6**.

#### *Tert*-butyl 2'-oxo-1a-phenyl-3-tosyl-1a,2,3,7b-tetrahydrospiro[cyclopropa[*c*]quinoline-1,3'-indoline]-1'-carboxylate (**6a**)

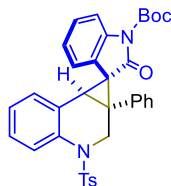

White solid, 117.1 mg, 99% yield; m.p. 195.6 – 196.7 °C

<sup>1</sup>H NMR (400 MHz, CDCl<sub>3</sub>) δ 7.96 (d, *J* = 8.2 Hz, 1H), 7.83 (d, *J* = 8.1 Hz, 1H), 7.38 (t, *J* = 7.1 Hz, 1H), 7.24 – 7.09 (m, 8H), 7.05 (d, *J* = 7.8 Hz, 2H), 6.82 (t, *J* = 7.6 Hz, 1H), 6.68 (s, 2H), 5.91 (d, *J* = 7.6 Hz, 1H), 4.89 (d, *J* = 16.2 Hz, 1H), 4.23 (d, *J* = 16.2 Hz, 1H), 3.64 (s, 1H), 2.41 (s, 3H), 1.48 (s, 9H).

<sup>13</sup>C NMR (101 MHz, CDCl<sub>3</sub>) δ 170.3, 148.9, 143.6, 140.5, 138.5, 137.0, 136.8, 131.0, 129.8, 128.7, 128.1, 127.5, 127.4, 127.3, 126.6, 126.2, 125.3, 123.4, 123.3, 122.2, 114.8, 84.1, 49.6, 43.1, 39.8, 31.5, 28.0, 21.6.

HRMS (ESI) *m/z*: [M + Na]<sup>+</sup> Calcd. for C<sub>35</sub>H<sub>32</sub>N<sub>2</sub>O<sub>5</sub>SNa 615.1924; found: 615.1930.

#### 1'-Benzyl-1a-phenyl-3-tosyl-1a,2,3,7b-tetrahydrospiro[cyclopropa[*c*]quinoline-1,3'-indolin]-2'-one (**6b**)

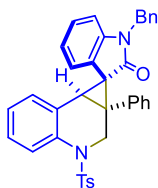

White solid, 108.0 mg, 93% yield; m.p. 262.2 – 263.0 °C

**<sup>1</sup>H NMR (400 MHz, CDCl<sub>3</sub>)** δ 7.96 (d, *J* = 8.1 Hz, 1H), 7.46 – 7.32 (m, 1H), 7.31 – 7.12 (m, 10H), 7.11 – 6.99 (m, 5H), 6.92 – 6.29 (m, 4H), 5.93 (d, *J* = 7.5 Hz, 1H), 5.00 (d, *J* = 15.6 Hz, 1H), 4.91 (d, *J* = 16.2 Hz, 1H), 4.43 (d, *J* = 15.6 Hz, 1H), 4.31 (d, *J* = 16.1 Hz, 1H), 3.68 (s, 1H), 2.42 (s, 3H).

**<sup>13</sup>C NMR (101 MHz, CDCl<sub>3</sub>)** δ 172.7, 143.8, 143.6, 139.2, 136.9, 136.9, 136.1, 130.9, 129.8, 128.8, 128.7, 128.5, 128.0, 127.6, 127.4, 127.3, 127.3, 127.2, 126.7, 126.3, 126.0, 124.3, 122.6, 121.4, 109.1, 50.3, 43.8, 43.1, 38.5, 30.8, 21.7.

**HRMS (ESI)** *m/z*: [M + Na]<sup>+</sup> Calcd. for C<sub>37</sub>H<sub>30</sub>N<sub>2</sub>O<sub>3</sub>SNa 605.1869; found: 605.1876.

**1'-Methyl-1a-phenyl-3-tosyl-1a,2,3,7b-tetrahydrospiro[cyclopropa[c]quinoline-1,3'-indolin]-2'-one (6c)**

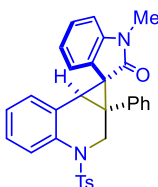

White solid, 117.1 mg, 70% yield; m.p. 231.2 – 232.0 °C

**<sup>1</sup>H NMR (400 MHz, CDCl<sub>3</sub>)** δ 7.97 (d, *J* = 8.2 Hz, 1H), 7.38 (t, *J* = 7.5 Hz, 1H), 7.25 – 7.10 (m, 8H), 7.06 (d, *J* = 7.8 Hz, 2H), 6.84 (d, *J* = 7.8 Hz, 1H), 6.80 – 6.46 (m, 3H), 5.97 (d, *J* = 7.5 Hz, 1H), 4.91 (d, *J* = 16.2 Hz, 1H), 4.35 (d, *J* = 16.2 Hz, 1H), 3.60 (s, 1H), 3.07 (s, 3H), 2.43 (s, 3H).

**<sup>13</sup>C NMR (101 MHz, CDCl<sub>3</sub>)** δ 172.8, 144.8, 143.5, 139.2, 137.0, 136.9, 130.9, 129.8, 128.7, 128.5, 128.0, 127.4, 127.3, 127.2, 126.7, 126.3, 126.0, 124.4, 122.6, 121.4, 108.3, 50.3, 43.1, 38.1, 31.0, 26.6, 21.7.

**HRMS (ESI)** *m/z*: [M + Na]<sup>+</sup> Calcd. for C<sub>31</sub>H<sub>26</sub>N<sub>2</sub>O<sub>3</sub>SNa 529.1556; found: 529.1566.

**1a,1'-Diphenyl-3-tosyl-1a,2,3,7b-tetrahydrospiro[cyclopropa[c]quinoline-1,3'-indolin]-2'-one (6d)**

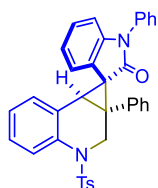

White solid, 113.0 mg, 99% yield; m.p. 259.0 – 259.7 °C

**<sup>1</sup>H NMR (400 MHz, CDCl<sub>3</sub>)** δ 7.99 (d, *J* = 8.2 Hz, 1H), 7.43 – 7.33 (m, 3H), 7.31 – 7.24 (m, 2H), 7.23 – 7.07 (m, 9H), 7.05 (d, *J* = 7.9 Hz, 2H), 6.87 – 6.48 (m, 4H), 6.01 (d, *J* = 7.5 Hz, 1H), 4.96 (d, *J* = 16.1 Hz, 1H), 4.37 (d, *J* = 16.1 Hz, 1H), 3.70 (s, 1H), 2.40 (s, 3H).

**<sup>13</sup>C NMR (101 MHz, CDCl<sub>3</sub>)** δ 171.9, 144.5, 143.5, 139.0, 137.0, 136.9, 134.5, 131.0, 129.8, 129.5, 128.6, 128.5, 128.0, 127.9, 127.4, 127.2, 127.1, 126.7, 126.6, 126.2, 125.8, 124.1, 122.7, 121.8, 109.5, 50.2, 43.1, 38.7, 31.1, 21.6.

**HRMS (ESI)** *m/z*: [M + Na]<sup>+</sup> Calcd. for C<sub>36</sub>H<sub>28</sub>N<sub>2</sub>O<sub>3</sub>SNa 591.1713; found: 591.1713.

**5'-Fluoro-1'-methyl-1a-phenyl-3-tosyl-1a,2,3,7b-tetrahydrospiro[cyclopropa[c]quinoline-1,3'-indolin]-2'-one (6e)**

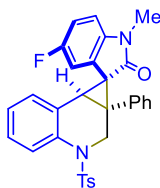

White solid, 104.2 mg, 99% yield; m.p. 245.0 – 245.7 °C

**<sup>1</sup>H NMR (400 MHz, CDCl<sub>3</sub>)** δ 7.95 (d, *J* = 8.2 Hz, 1H), 7.39 (t, *J* = 7.6 Hz, 1H), 7.24 – 7.10 (m, 7H), 7.06 (d, *J* = 7.8 Hz, 2H), 6.89 (t, *J* = 8.7 Hz, 1H), 6.81 – 6.47 (m, 3H), 5.68 (d, *J* = 8.9 Hz, 1H), 4.91 (d, *J* = 16.2 Hz, 1H), 4.26 (d, *J* = 16.2 Hz, 1H), 3.62 (s, 1H), 3.04 (s, 3H), 2.42 (s, 3H).

**<sup>13</sup>C NMR (101 MHz, CDCl<sub>3</sub>)** δ 172.5, 158.0 (d, *J* = 239.3 Hz) 143.6, 140.8, 140.7, 138.9, 136.8 (d, *J* = 3.4 Hz), 130.8, 129.8, 128.8, 128.7, 128.1, 127.4, 126.8, 126.4, 125.9 (d, *J* = 8.9 Hz), 125.5, 113.4 (d, *J* = 23.4 Hz), 110.8 (d, *J* = 26.9 Hz), 108.4 (d, *J* = 8.4 Hz), 50.1, 43.2, 38.7, 31.3, 26.7, 21.7.

**HRMS (ESI)** m/z: [M + Na]<sup>+</sup> Calcd. for C<sub>31</sub>H<sub>25</sub>FN<sub>2</sub>O<sub>3</sub>SNa 547.1462; found: 547.1476.

**1',5'-Dimethyl-1a-phenyl-3-tosyl-1a,2,3,7b-tetrahydrospiro[cyclopropa[c]quinoline-1,3'-indolin]-2'-one (6f)**

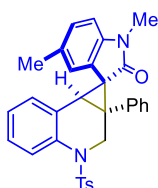

White solid, 101.6 mg, 98% yield; m.p. 238.8 – 239.5 °C

**<sup>1</sup>H NMR (400 MHz, CDCl<sub>3</sub>)** δ 7.99 (d, *J* = 8.2 Hz, 1H), 7.39 (t, *J* = 7.5 Hz, 1H), 7.25 – 7.11 (m, 7H), 7.07 (d, *J* = 7.9 Hz, 2H), 7.01 (d, *J* = 7.8 Hz, 1H), 6.85 – 6.38 (m, 3H), 5.76 (s, 1H), 4.92 (d, *J* = 16.1 Hz, 1H), 4.37 (d, *J* = 16.1 Hz, 1H), 3.59 (s, 1H), 3.04 (s, 3H), 2.44 (s, 3H), 2.09 (s, 3H).

**<sup>13</sup>C NMR (101 MHz, CDCl<sub>3</sub>)** δ 172.7, 143.5, 142.4, 139.3, 136.9, 136.8, 130.9, 130.7, 129.8, 128.6, 128.3, 128.0, 127.5, 127.4, 127.1, 126.6, 126.2, 126.1, 124.3, 123.5, 107.9, 50.3, 43.1, 37.9, 30.8, 26.6, 21.6, 21.3.

**HRMS (ESI)** m/z: [M + Na]<sup>+</sup> Calcd. for C<sub>32</sub>H<sub>28</sub>N<sub>2</sub>O<sub>3</sub>SNa 543.1713; found: 543.1715.

**6'-Fluoro-1a,1'-diphenyl-3-tosyl-1a,2,3,7b-tetrahydrospiro[cyclopropa[c]quinoline-1,3'-indolin]-2'-one (6g)**

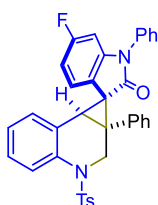

White solid, 113.8 mg, 97% yield; m.p. 249.3 – 250.1 °C

**<sup>1</sup>H NMR (400 MHz, CDCl<sub>3</sub>)** δ 7.98 (d, *J* = 8.2 Hz, 1H), 7.40 (t, *J* = 7.2 Hz, 3H), 7.34 – 7.28 (m, 1H), 7.28 – 7.22 (m, 2H), 7.22 – 7.09 (m, 7H), 7.06 (d, *J* = 7.8 Hz, 2H), 6.71 (s, 2H), 6.57 (d, *J* = 9.0 Hz, 1H),

6.45 (t,  $J = 8.8$  Hz, 1H), 5.95 – 5.86 (m, 1H), 4.96 (d,  $J = 16.2$  Hz, 1H), 4.30 (d,  $J = 16.2$  Hz, 1H), 3.67 (s, 1H), 2.41 (s, 3H).

$^{13}\text{C}$  NMR (101 MHz,  $\text{CDCl}_3$ )  $\delta$  172.1, 162.5 (d,  $J = 245.9$  Hz), 145.9 (d,  $J = 11.3$  Hz), 143.6, 138.8, 136.9, 136.8, 134.1, 130.9, 129.8, 129.6, 128.7, 128.6, 128.2, 128.1, 127.4, 127.3, 126.7, 126.6, 126.3, 125.6, 123.6 (d,  $J = 9.4$  Hz), 119.4, 119.4, 108.1 (d,  $J = 22.2$  Hz), 98.4 (d,  $J = 27.9$  Hz), 50.2, 42.8, 38.6, 31.0, 21.6.

HRMS (ESI)  $m/z$ :  $[\text{M} + \text{Na}]^+$  Calcd. for  $\text{C}_{36}\text{H}_{27}\text{FN}_2\text{O}_3\text{SNa}$  609.1619; found: 609.1623.

**6'-Chloro-1a,1'-diphenyl-3-tosyl-1a,2,3,7b-tetrahydrospiro[cyclopropa[c]quinoline-1,3'-indolin]-2'-one (6h)**

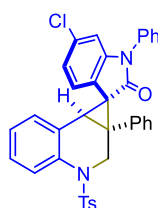

White solid, 118.9 mg, 99% yield; m.p. 266.3 – 267.0 °C

$^1\text{H}$  NMR (400 MHz,  $\text{CDCl}_3$ )  $\delta$  7.98 (d,  $J = 8.2$  Hz, 1H), 7.40 (t,  $J = 7.5$  Hz, 3H), 7.35 – 7.28 (m, 1H), 7.28 – 7.22 (m, 2H), 7.21 – 7.09 (m, 7H), 7.06 (d,  $J = 7.9$  Hz, 2H), 6.91 – 6.38 (m, 4H), 5.89 (d,  $J = 8.1$  Hz, 1H), 4.96 (d,  $J = 16.2$  Hz, 1H), 4.29 (d,  $J = 16.2$  Hz, 1H), 3.69 (s, 1H), 2.41 (s, 3H).

$^{13}\text{C}$  NMR (101 MHz,  $\text{CDCl}_3$ )  $\delta$  171.8, 145.7, 143.7, 138.7, 137.0, 136.8, 134.0, 133.5, 131.0, 129.9, 129.7, 128.8, 128.6, 128.3, 128.2, 127.5, 127.4, 126.8, 126.7, 126.4, 125.5, 123.4, 122.5, 121.7, 110.1, 50.1, 42.9, 39.2, 31.3, 21.7.

HRMS (ESI)  $m/z$ :  $[\text{M} + \text{Na}]^+$  Calcd. for  $\text{C}_{36}\text{H}_{27}\text{ClN}_2\text{O}_3\text{SNa}$  625.1323, 627.1310; found: 625.1332, 627.1320.

***Tert*-butyl 2'-oxo-1a-(*p*-tolyl)-3-tosyl-1a,2,3,7b-tetrahydrospiro[cyclopropa[c]quinoline-1,3'-indoline]-1'-carboxylate (6i)**

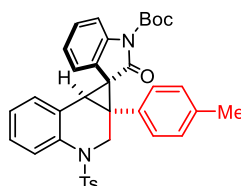

White solid, 118.4 mg, 98% yield; m.p. 179.4 – 180.5 °C

$^1\text{H}$  NMR (400 MHz,  $\text{CDCl}_3$ )  $\delta$  7.95 (d,  $J = 8.3$  Hz, 1H), 7.82 (d,  $J = 8.0$  Hz, 1H), 7.38 (t,  $J = 7.2$  Hz, 1H), 7.25 – 7.14 (m, 5H), 7.06 (d,  $J = 7.7$  Hz, 2H), 6.95 (d,  $J = 7.3$  Hz, 2H), 6.82 (t,  $J = 7.6$  Hz, 1H), 6.60 (s, 2H), 5.91 (d,  $J = 7.5$  Hz, 1H), 4.89 (d,  $J = 16.2$  Hz, 1H), 4.21 (d,  $J = 16.1$  Hz, 1H), 3.63 (s, 1H), 2.42 (s, 3H), 2.33 (s, 3H), 1.51 (s, 9H).

$^{13}\text{C}$  NMR (101 MHz,  $\text{CDCl}_3$ )  $\delta$  170.4, 148.9, 143.6, 140.5, 137.1, 136.8, 136.8, 135.4, 131.0, 129.7, 128.8, 128.7, 128.6, 127.4, 127.4, 126.5, 126.0, 125.3, 123.6, 123.3, 122.3, 114.7, 84.1, 49.8, 43.1, 39.8, 31.6, 28.0, 21.6, 21.3.

HRMS (ESI)  $m/z$ :  $[\text{M} + \text{Na}]^+$  Calcd. for  $\text{C}_{36}\text{H}_{34}\text{N}_2\text{O}_5\text{SNa}$  629.2081; found: 629.2086.

**Tert-butyl 1a-(4-(tert-butyl)phenyl)-2'-oxo-3-tosyl-1a,2,3,7b-tetrahydrospiro[cyclopropa[c]quinoline-1,3'-indoline]-1'-carboxylate (6j)**

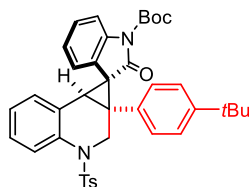

White solid, 126.5 mg, 98% yield; m.p. 109.8 – 110.5 °C

**<sup>1</sup>H NMR (400 MHz, CDCl<sub>3</sub>)** δ 7.97 (d, *J* = 8.2 Hz, 1H), 7.84 (d, *J* = 8.1 Hz, 1H), 7.43 – 7.35 (m, 1H), 7.24 – 7.18 (m, 3H), 7.17 – 7.08 (m, 4H), 7.02 (d, *J* = 7.8 Hz, 2H), 6.82 (t, *J* = 7.6 Hz, 1H), 6.61 (s, 2H), 5.90 (d, *J* = 7.7 Hz, 1H), 4.91 (d, *J* = 16.2 Hz, 1H), 4.22 (d, *J* = 16.2 Hz, 1H), 3.65 (s, 1H), 2.43 (s, 3H), 1.47 (s, 9H), 1.33 (s, 9H).

**<sup>13</sup>C NMR (101 MHz, CDCl<sub>3</sub>)** δ 170.2, 149.8, 149.0, 143.3, 140.5, 137.0, 136.9, 135.1, 130.9, 129.7, 128.6, 128.3, 127.4, 127.3, 126.6, 126.4, 125.4, 124.8, 123.6, 123.3, 122.2, 114.7, 83.9, 49.7, 43.2, 39.5, 34.5, 31.4, 31.2, 28.0, 21.6.

**HRMS (ESI)** m/z: [M + Na]<sup>+</sup> Calcd. for C<sub>39</sub>H<sub>40</sub>N<sub>2</sub>O<sub>5</sub>SNa 671.2550; found: 671.2559.

**Tert-butyl 1a-(4-fluorophenyl)-2'-oxo-3-tosyl-1a,2,3,7b-tetrahydrospiro [cyclopropa[c]quinoline-1,3'-indoline]-1'-carboxylate (6k)**

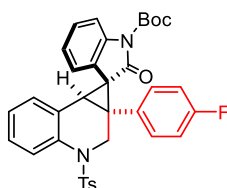

White solid, 121.9 mg, 99% yield; m.p. 181.0 – 182.1 °C

**<sup>1</sup>H NMR (400 MHz, CDCl<sub>3</sub>)** δ 7.94 (d, *J* = 8.2 Hz, 1H), 7.84 (d, *J* = 8.2 Hz, 1H), 7.40 (t, *J* = 7.6 Hz, 1H), 7.25 – 7.15 (m, 5H), 7.09 (d, *J* = 7.8 Hz, 2H), 6.83 (t, *J* = 7.2 Hz, 3H), 6.68 (s, 2H), 5.91 (d, *J* = 7.7 Hz, 1H), 4.84 (d, *J* = 16.2 Hz, 1H), 4.22 (d, *J* = 16.2 Hz, 1H), 3.61 (s, 1H), 2.43 (s, 3H), 1.51 (s, 9H).

**<sup>13</sup>C NMR (101 MHz, CDCl<sub>3</sub>)** δ 170.4, 161.8 (d, *J* = 246.4 Hz, 1C) 148.8, 143.7, 140.5, 137.0, 137.0, 134.3 (d, *J* = 3.2 Hz, 1C), 131.0, 130.4 (d, *J* = 7.2 Hz, 1C) 129.8, 128.8, 127.6, 127.3, 126.7, 126.2, 125.1, 123.4, 123.2, 122.3, 115.0 (d, *J* = 21.9 Hz, 1C), 114.8, 84.3, 49.6, 43.0, 39.1, 31.8, 28.0, 21.6.

**HRMS (ESI)** m/z: [M + Na]<sup>+</sup> Calcd. for C<sub>35</sub>H<sub>31</sub>FN<sub>2</sub>O<sub>5</sub>SNa 633.1830; found: 633.1837.

**Tert-butyl 1a-(4-bromophenyl)-2'-oxo-3-tosyl-1a,2,3,7b-tetrahydrospiro [cyclopropa[c]quinoline-1,3'-indoline]-1'-carboxylate (6l)**

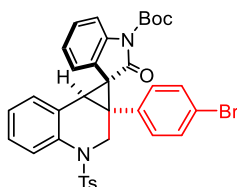

White solid, 134.0 mg, 99% yield; m.p. 131.7 – 132.5 °C

**<sup>1</sup>H NMR (400 MHz, CDCl<sub>3</sub>)** δ 7.93 (d, *J* = 8.2 Hz, 1H), 7.83 (d, *J* = 8.1 Hz, 1H), 7.39 (t, *J* = 7.6 Hz, 1H), 7.30 – 7.14 (m, 7H), 7.08 (d, *J* = 7.9 Hz, 2H), 6.82 (t, *J* = 7.6 Hz, 1H), 6.60 (s, 2H), 5.91 (d, *J* = 7.7 Hz, 1H), 4.80 (d, *J* = 16.2 Hz, 1H), 4.21 (d, *J* = 16.2 Hz, 1H), 3.60 (s, 1H), 2.44 (s, 3H), 1.52 (s, 9H).

$^{13}\text{C}$  NMR (101 MHz,  $\text{CDCl}_3$ )  $\delta$  170.3, 148.8, 143.9, 140.5, 137.5, 137.0, 136.9, 131.2, 130.9, 130.4, 129.8, 128.8, 127.7, 127.3, 126.7, 126.2, 124.8, 123.4, 123.1, 122.3, 121.2, 114.9, 84.4, 49.3, 43.0, 39.0, 31.5, 28.0, 21.7.

HRMS (ESI)  $m/z$ :  $[\text{M} + \text{Na}]^+$  Calcd. for  $\text{C}_{35}\text{H}_{31}\text{BrN}_2\text{O}_5\text{SNa}$  693.1029, 695.1014; found: 693.1034, 695.1020.

***Tert*-butyl 1a-(3-fluorophenyl)-2'-oxo-3-tosyl-1a,2,3,7b-tetrahydrospiro [cyclopropa[*c*]quinoline-1,3'-indoline]-1'-carboxylate (6m)**

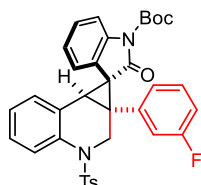

White solid, 119.6 mg, 98% yield; m.p. 176.9 – 178.3 °C

$^1\text{H}$  NMR (400 MHz,  $\text{CDCl}_3$ )  $\delta$  7.98 (d,  $J = 8.2$  Hz, 1H), 7.83 (d,  $J = 8.1$  Hz, 1H), 7.41 (t,  $J = 7.6$  Hz, 1H), 7.25 – 7.05 (m, 8H), 6.94 – 6.77 (m, 2H), 6.59 (s, 1H), 6.12 (s, 1H), 5.91 (d,  $J = 7.6$  Hz, 1H), 4.84 (d,  $J = 16.3$  Hz, 1H), 4.23 (d,  $J = 16.3$  Hz, 1H), 3.58 (s, 1H), 2.43 (s, 3H), 1.51 (s, 9H).

$^{13}\text{C}$  NMR (101 MHz,  $\text{CDCl}_3$ )  $\delta$  170.3, 162.2 (d,  $J = 244.9$  Hz), 148.8, 144.2, 141.1 (d,  $J = 7.6$  Hz), 140.6, 136.9 (d,  $J = 22.7$  Hz), 130.9, 129.9, 128.9, 127.7, 127.3, 126.8, 126.5, 124.9, 124.3, 123.4, 123.1, 122.3, 116.0 (d,  $J = 22.4$  Hz), 114.9, 114.3 (d,  $J = 21.1$  Hz), 84.3, 49.4, 43.1, 39.0, 31.6, 28.0, 21.6.

HRMS (ESI)  $m/z$ :  $[\text{M} + \text{Na}]^+$  Calcd. for  $\text{C}_{35}\text{H}_{31}\text{FN}_2\text{O}_5\text{SNa}$  633.1830; found: 633.1828.

***Tert*-butyl 1a-(3-chlorophenyl)-2'-oxo-3-tosyl-1a,2,3,7b-tetrahydrospiro [cyclopropa[*c*]quinoline-1,3'-indoline]-1'-carboxylate (6n)**

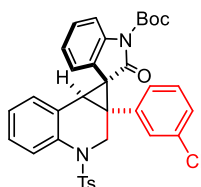

White solid, 124.9 mg, 99% yield; m.p. 181.8 – 182.5 °C

$^1\text{H}$  NMR (400 MHz,  $\text{CDCl}_3$ )  $\delta$  7.99 (d,  $J = 8.0$  Hz, 1H), 7.83 (d,  $J = 8.1$  Hz, 1H), 7.41 (t,  $J = 7.6$  Hz, 1H), 7.26 – 7.06 (m, 9H), 6.83 (t,  $J = 7.6$  Hz, 1H), 6.79 – 6.27 (m, 2H), 5.91 (d,  $J = 7.6$  Hz, 1H), 4.89 (d,  $J = 16.3$  Hz, 1H), 4.23 (d,  $J = 16.3$  Hz, 1H), 3.59 (s, 1H), 2.44 (s, 3H), 1.51 (s, 9H).

$^{13}\text{C}$  NMR (101 MHz,  $\text{CDCl}_3$ )  $\delta$  170.3, 148.8, 144.0, 140.7, 140.6, 136.9, 136.6, 133.8, 131.0, 129.9, 129.6, 129.0, 128.9, 127.7, 127.6, 127.3, 127.0, 126.8, 126.4, 124.9, 123.4, 123.0, 122.4, 114.9, 84.4, 49.3, 43.1, 39.0, 31.5, 28.0, 21.8.

HRMS (ESI)  $m/z$ :  $[\text{M} + \text{Na}]^+$  Calcd. for  $\text{C}_{35}\text{H}_{31}\text{ClN}_2\text{O}_5\text{SNa}$  649.1534, 651.1521; found: 649.1534, 651.1525.

***Tert*-butyl 1a-([1,1'-biphenyl]-4-yl)-2'-oxo-3-tosyl-1a,2,3,7b-tetrahydrospiro[cyclopropa[*c*]quinoline-1,3'-indoline]-1'-carboxylate (6o)**

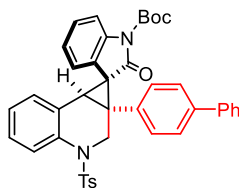

White solid, 130.1 mg, 97% yield;

**<sup>1</sup>H NMR (400 MHz, CDCl<sub>3</sub>)** δ 7.98 (d, *J* = 8.2 Hz, 1H), 7.84 (d, *J* = 8.1 Hz, 1H), 7.61 (d, *J* = 7.5 Hz, 2H), 7.47 (t, *J* = 7.4 Hz, 2H), 7.44 – 7.32 (m, 4H), 7.25 – 7.16 (m, 5H), 7.06 (d, *J* = 7.9 Hz, 2H), 6.92 – 6.63 (m, 3H), 5.94 (d, *J* = 7.6 Hz, 1H), 4.95 (d, *J* = 16.2 Hz, 1H), 4.27 (d, *J* = 16.2 Hz, 1H), 3.69 (s, 1H), 2.40 (s, 3H), 1.49 (s, 9H).

**<sup>13</sup>C NMR (101 MHz, CDCl<sub>3</sub>)** δ 170.4, 149.0, 143.7, 140.8, 140.6, 140.0, 137.5, 137.1, 136.9, 131.1, 129.8, 129.2, 128.9, 128.8, 127.6, 127.5, 127.1, 126.8, 126.7, 126.3, 125.3, 123.5, 123.4, 122.4, 114.9, 84.3, 49.7, 43.3, 39.6, 31.7, 28.1, 21.7.

**HRMS (ESI)** *m/z*: [M + Na]<sup>+</sup> Calcd. for C<sub>41</sub>H<sub>36</sub>N<sub>2</sub>O<sub>5</sub>SNa 691.2237; found: 691.2242.

***Tert*-butyl 1a-(naphthalen-2-yl)-2'-oxo-3-tosyl-1a,2,3,7b-tetrahydrospiro [cyclopropa[c]quinoline-1,3'-indoline]-1'-carboxylate (6p)**

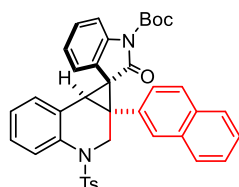

White solid, 128.0 mg, 99% yield; m.p. 197.0 – 198.0 °C

**<sup>1</sup>H NMR (400 MHz, CDCl<sub>3</sub>)** δ 8.02 (d, *J* = 8.2 Hz, 1H), 7.83 (d, *J* = 8.2 Hz, 1H), 7.78 (d, *J* = 7.0 Hz, 1H), 7.73 – 7.51 (m, 2H), 7.51 – 7.35 (m, 3H), 7.30 – 7.16 (m, 3H), 7.15 – 6.60 (m, 7H), 5.97 (d, *J* = 7.7 Hz, 1H), 5.04 (d, *J* = 16.2 Hz, 1H), 4.32 (d, *J* = 16.2 Hz, 1H), 3.79 (s, 1H), 2.33 (s, 3H), 1.42 (s, 9H).

**<sup>13</sup>C NMR (101 MHz, CDCl<sub>3</sub>)** δ 170.2, 148.8, 143.5, 140.6, 137.1, 136.8, 132.8, 132.7, 131.1, 129.7, 128.8, 128.3, 127.7, 127.5, 127.3, 126.7, 126.2, 126.1, 126.0, 125.2, 123.5, 123.4, 122.4, 114.8, 84.2, 49.6, 40.0, 31.7, 28.0, 21.7.

**HRMS (ESI)** *m/z*: [M + Na]<sup>+</sup> Calcd. for C<sub>39</sub>H<sub>34</sub>N<sub>2</sub>O<sub>5</sub>SNa 665.2081; found: 665.2087.

**5. Procedure for the synthesis of epoxypropane-fused tetrahydroquinolines 8**

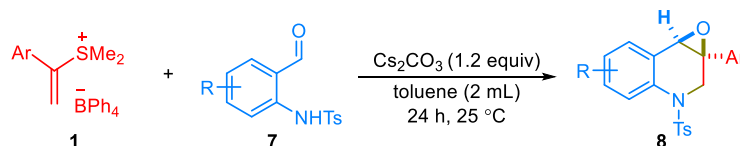

Substrate **1** (0.24 mmol), substrate **5** (0.20 mmol), Cs<sub>2</sub>CO<sub>3</sub> (0.24 mmol) and 2.0 mL of toluene were successively added to a vial. The resulting mixture was stirred at room temperature for indicated time. After completion of the reaction (monitored by TLC), the reaction mixture was directly subjected to flash column chromatography (petroleum ether/ethyl acetate (20:1)) on silica gel to afford the corresponding product **6**.

**1a-Phenyl-3-tosyl-1a,2,3,7b-tetrahydrooxireno[2,3-c]quinoline (8a)**

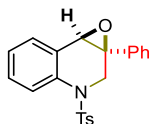

White solid, 46.0 mg, 61% yield; m.p. 164.3 – 165.5 °C

**<sup>1</sup>H NMR (400 MHz, CDCl<sub>3</sub>)** δ 7.81 (d, *J* = 8.1 Hz, 1H), 7.41 (d, *J* = 8.1 Hz, 2H), 7.36 – 7.16 (m, 7H), 7.15 – 7.07 (m, 3H), 4.74 (d, *J* = 15.2 Hz, 1H), 3.79 (d, *J* = 15.3 Hz, 1H), 3.57 (s, 1H), 2.30 (s, 3H).

**<sup>13</sup>C NMR (101 MHz, CDCl<sub>3</sub>)** δ 143.5, 136.1, 135.6, 135.5, 129.8, 129.6, 129.1, 128.9, 128.7, 128.1, 127.2, 126.3, 126.0, 125.5, 69.0, 59.0, 46.5, 21.8.

**HRMS (ESI)** m/z: [M+Na]<sup>+</sup> Calcd. for C<sub>22</sub>H<sub>19</sub>NO<sub>3</sub>SNa 400.0978; found: 400.0976.

**1a-(*p*-Tolyl)-3-tosyl-1a,2,3,7b-tetrahydrooxireno[2,3-*c*]quinoline (8b)**

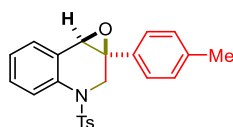

White solid, 24.2 mg, 31% yield; m.p. 149.5 – 150.3 °C

**<sup>1</sup>H NMR (400 MHz, CDCl<sub>3</sub>)** δ 7.79 (d, *J* = 8.2 Hz, 1H), 7.40 (d, *J* = 7.9 Hz, 2H), 7.30 (t, *J* = 7.7 Hz, 1H), 7.20 (d, *J* = 7.4 Hz, 1H), 7.15 – 7.01 (m, 7H), 4.72 (d, *J* = 15.2 Hz, 1H), 3.75 (d, *J* = 15.2 Hz, 1H), 3.55 (s, 1H), 2.28 (s, 6H).

**<sup>13</sup>C NMR (101 MHz, CDCl<sub>3</sub>)** δ 143.5, 138.6, 135.7, 135.5, 133.1, 129.8, 129.5, 129.4, 129.1, 128.1, 127.3, 126.3, 126.0, 125.5, 69.0, 59.0, 46.5, 21.8, 21.3.

**HRMS (ESI)** m/z: [M+Na]<sup>+</sup> Calcd. for C<sub>23</sub>H<sub>21</sub>NO<sub>3</sub>SNa 414.1134; found: 414.1127.

**1a-(4-(*Tert*-butyl)phenyl)-3-tosyl-1a,2,3,7b-tetrahydrooxireno[2,3-*c*]quinoline (8c)**

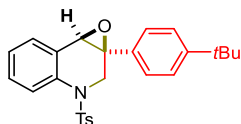

White solid, 28.0 mg, 33% yield; m.p. 159.4 – 198.0 °C

**<sup>1</sup>H NMR (400 MHz, CDCl<sub>3</sub>)** δ 7.80 (d, *J* = 8.1 Hz, 1H), 7.40 (d, *J* = 7.9 Hz, 2H), 7.36 – 7.27 (m, 3H), 7.23 – 7.15 (m, 3H), 7.14 – 7.06 (m, 3H), 4.74 (d, *J* = 15.3 Hz, 1H), 3.78 (d, *J* = 15.2 Hz, 1H), 3.57 (s, 1H), 2.29 (s, 3H), 1.24 (s, 9H).

**<sup>13</sup>C NMR (101 MHz, CDCl<sub>3</sub>)** δ 151.9, 143.5, 135.7, 135.5, 133.2, 129.7, 129.5, 129.1, 128.1, 127.3, 126.3, 126.0, 125.8, 125.3, 68.9, 59.1, 46.4, 34.8, 31.4, 21.8.

**HRMS (ESI)** m/z: [M+Na]<sup>+</sup> Calcd. for C<sub>26</sub>H<sub>27</sub>NO<sub>3</sub>SNa 456.1604; found: 456.1612.

**1a-([1,1'-Biphenyl]-4-yl)-3-tosyl-1a,2,3,7b-tetrahydrooxireno[2,3-*c*]quinoline (8d)**

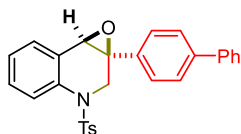

White solid, 42.2 mg, 47% yield; m.p. 173.0 – 173.6 °C



**<sup>1</sup>H NMR (400 MHz, CDCl<sub>3</sub>)** δ 7.90 (d, *J* = 8.2 Hz, 1H), 7.60 (t, *J* = 8.2 Hz, 4H), 7.51 (d, *J* = 7.8 Hz, 2H), 7.49 – 7.35 (m, 6H), 7.31 (d, *J* = 7.4 Hz, 1H), 7.24 – 7.16 (m, 3H), 4.87 (d, *J* = 15.2 Hz, 1H), 3.92 (d, *J* = 15.2 Hz, 1H), 3.70 (s, 1H), 2.39 (s, 3H).

**<sup>13</sup>C NMR (101 MHz, CDCl<sub>3</sub>)** δ 143.5, 141.7, 140.5, 135.7, 135.5, 135.1, 129.8, 129.6, 129.2, 129.0, 128.1, 127.8, 127.6, 127.2, 127.1, 126.3, 126.0, 126.0, 68.8, 59.2, 46.4, 21.8.

**HRMS (ESI)** *m/z*: [M+Na]<sup>+</sup> Calcd. for C<sub>28</sub>H<sub>23</sub>NO<sub>3</sub>SNa 476.1291; found: 476.1297.

**1a-(4-Fluorophenyl)-3-tosyl-1a,2,3,7b-tetrahydrooxireno[2,3-*c*]quinoline (8e)**

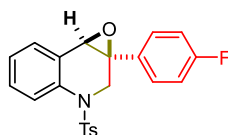

White solid, 32.5 mg, 41% yield; m.p. 190.0 – 190.7 °C

**<sup>1</sup>H NMR (400 MHz, CDCl<sub>3</sub>)** δ 7.87 (d, *J* = 8.2 Hz, 1H), 7.48 (d, *J* = 7.8 Hz, 2H), 7.40 (t, *J* = 7.7 Hz, 1H), 7.34 – 7.27 (m, 3H), 7.23 – 7.13 (m, 3H), 7.06 (t, *J* = 8.3 Hz, 2H), 4.78 (d, *J* = 15.2 Hz, 1H), 3.82 (d, *J* = 15.2 Hz, 1H), 3.62 (s, 1H), 2.37 (s, 3H).

**<sup>13</sup>C NMR (101 MHz, CDCl<sub>3</sub>)** δ 162.9 (d, *J* = 247.9 Hz, 1C), 143.6, 135.6, 135.4, 132.0, 132.0, 129.7 (d, *J* = 10.4 Hz, 1C), 129.2, 128.0, 127.5 (d, *J* = 8.4 Hz, 1C), 126.9, 126.3, 126.1, 115.9 (d, *J* = 21.7 Hz, 1C), 68.6, 59.0, 46.5, 21.8.

**HRMS (ESI)** *m/z*: [M+Na]<sup>+</sup> Calcd. for C<sub>22</sub>H<sub>18</sub>FNO<sub>3</sub>SNa 418.0884; found: 418.0892.

**1a-(4-Bromophenyl)-3-tosyl-1a,2,3,7b-tetrahydrooxireno[2,3-*c*]quinoline (8f)**

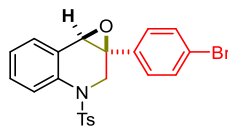

White solid, 62.0 mg, 68% yield; m.p. 145.2 – 146.0 °C

**<sup>1</sup>H NMR (400 MHz, CDCl<sub>3</sub>)** δ 7.85 (d, *J* = 8.2 Hz, 1H), 7.52 – 7.43 (m, 4H), 7.39 (t, *J* = 7.7 Hz, 1H), 7.27 (d, *J* = 7.5 Hz, 1H), 7.23 – 7.14 (m, 5H), 4.76 (d, *J* = 15.2 Hz, 1H), 3.82 (d, *J* = 15.2 Hz, 1H), 3.60 (s, 1H), 2.36 (s, 3H).

**<sup>13</sup>C NMR (101 MHz, CDCl<sub>3</sub>)** δ 143.6, 135.6, 135.4, 135.1, 132.0, 129.8, 129.7, 129.1, 128.0, 127.2, 126.8, 126.3, 126.1, 122.8, 68.5, 59.1, 46.2, 21.7.

**HRMS (ESI)** *m/z*: [M+Na]<sup>+</sup> Calcd. for C<sub>22</sub>H<sub>18</sub>BrNO<sub>3</sub>SNa 478.0083, 480.0064; found: 478.0084, 480.0065.

**1a-(3-Fluorophenyl)-3-tosyl-1a,2,3,7b-tetrahydrooxireno[2,3-*c*]quinoline (8g)**

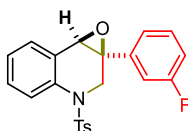

White solid, 48.1 mg, 61% yield; m.p. 143.4 – 143.9 °C

**<sup>1</sup>H NMR (400 MHz, CDCl<sub>3</sub>)** δ 7.87 (d, *J* = 8.2 Hz, 1H), 7.47 (d, *J* = 8.0 Hz, 2H), 7.44 – 7.32 (m, 2H), 7.31 – 7.24 (m, 1H), 7.19 (t, *J* = 7.5 Hz, 3H), 7.12 (d, *J* = 7.7 Hz, 1H), 7.08 – 6.97 (m, 2H), 4.79 (d, *J* = 15.2 Hz, 1H), 3.86 (d, *J* = 15.2 Hz, 1H), 3.62 (s, 1H), 2.38 (s, 3H).

$^{13}\text{C}$  NMR (101 MHz,  $\text{CDCl}_3$ )  $\delta$  163.1 (d,  $J = 247.3$  Hz), 143.6, 138.7, 138.6, 135.6, 135.4, 130.6 (d,  $J = 8.3$  Hz), 129.8, 129.7, 129.2, 128.0, 126.7, 126.3, 126.1, 121.2 (d,  $J = 3.0$  Hz), 115.7 (d,  $J = 21.1$  Hz), 112.6 (d,  $J = 22.9$  Hz), 68.4 (d,  $J = 2.0$  Hz), 59.3, 46.2, 21.7.

HRMS (ESI)  $m/z$ :  $[\text{M}+\text{Na}]^+$  Calcd. for  $\text{C}_{22}\text{H}_{18}\text{FNO}_3\text{SNa}$  418.0884; found: 418.0888.

#### 1a-(Naphthalen-2-yl)-3-tosyl-1a,2,3,7b-tetrahydrooxireno[2,3-c]quinoline (8h)

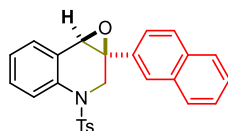

White solid, 47.8 mg, 56% yield; m.p. 165.8 – 166.2 °C

$^1\text{H}$  NMR (400 MHz,  $\text{CDCl}_3$ )  $\delta$  7.91 (d,  $J = 8.2$  Hz, 1H), 7.89 – 7.79 (m, 4H), 7.52 (d,  $J = 7.2$  Hz, 4H), 7.46 – 7.37 (m, 2H), 7.32 (d,  $J = 7.4$  Hz, 1H), 7.25 – 7.16 (m, 3H), 4.93 (d,  $J = 15.2$  Hz, 1H), 3.99 (d,  $J = 15.2$  Hz, 1H), 3.75 (s, 1H), 2.39 (s, 3H).

$^{13}\text{C}$  NMR (101 MHz,  $\text{CDCl}_3$ )  $\delta$  143.5, 135.7, 135.5, 133.5, 133.3, 133.1, 129.8, 129.7, 129.2, 128.8, 128.1, 127.9, 127.1, 126.8, 126.7, 126.3, 126.0, 125.1, 122.9, 69.2, 59.2, 46.6, 21.8.

HRMS (ESI)  $m/z$ :  $[\text{M}+\text{Na}]^+$  Calcd. for  $\text{C}_{26}\text{H}_{21}\text{NO}_3\text{SNa}$  450.1134; found: 450.1127.

#### 6-Chloro-1a-phenyl-3-tosyl-1a,2,3,7b-tetrahydrooxireno[2,3-c]quinoline (8i)

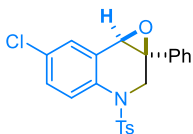

White solid, 47.2 mg, 57% yield; m.p. 153.6 – 154.2 °C

$^1\text{H}$  NMR (400 MHz,  $\text{CDCl}_3$ )  $\delta$  7.81 (d,  $J = 8.7$  Hz, 1H), 7.47 (d,  $J = 7.8$  Hz, 2H), 7.41 – 7.32 (m, 4H), 7.31 – 7.27 (m, 2H), 7.25 (s, 1H), 7.20 (d,  $J = 7.9$  Hz, 2H), 4.78 (d,  $J = 15.3$  Hz, 1H), 3.83 (d,  $J = 15.3$  Hz, 1H), 3.57 (s, 1H), 2.37 (s, 3H).

$^{13}\text{C}$  NMR (101 MHz,  $\text{CDCl}_3$ )  $\delta$  143.7, 135.5, 135.2, 134.0, 131.2, 129.5, 129.2, 128.9, 128.0, 127.6, 125.5, 69.0, 58.3, 46.3, 21.7.

HRMS (ESI)  $m/z$ :  $[\text{M}+\text{Na}]^+$  Calcd. for  $\text{C}_{22}\text{H}_{18}\text{ClNO}_3\text{SNa}$  434.0588, 436.0565; found: 434.0591, 436.0570.

#### 6-Bromo-1a-phenyl-3-tosyl-1a,2,3,7b-tetrahydrooxireno[2,3-c]quinoline (8j)

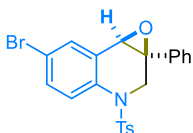

White solid, 42.3 mg, 46% yield; m.p. 162.5 – 163.3 °C

$^1\text{H}$  NMR (400 MHz,  $\text{CDCl}_3$ )  $\delta$  7.76 (d,  $J = 8.7$  Hz, 1H), 7.53 – 7.44 (m, 3H), 7.42 – 7.34 (m, 4H), 7.33 – 7.27 (m, 2H), 7.21 (d,  $J = 7.9$  Hz, 2H), 4.79 (d,  $J = 15.3$  Hz, 1H), 3.83 (d,  $J = 15.3$  Hz, 1H), 3.57 (s, 1H), 2.39 (s, 3H).

$^{13}\text{C}$  NMR (101 MHz,  $\text{CDCl}_3$ )  $\delta$  143.8, 135.6, 135.2, 134.6, 132.5, 132.4, 129.3, 129.2, 128.9, 128.0, 127.9, 125.5, 119.0, 69.1, 58.2, 46.4, 21.7.

**HRMS (ESI)**  $m/z$ :  $[M+Na]^+$  Calcd. for  $C_{22}H_{18}BrNO_3SNa$  478.0083, 480.0064; found: 478.0088, 480.0069.

**7-Bromo-1a-phenyl-3-tosyl-1a,2,3,7b-tetrahydrooxireno[2,3-c]quinoline (8k)**

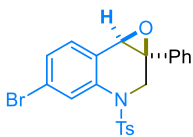

White solid, 30.3 mg, 33% yield; m.p. 166.4 – 166.9 °C

**$^1H$  NMR (400 MHz,  $CDCl_3$ )**  $\delta$  8.06 (s, 1H), 7.51 (d,  $J = 8.0$  Hz, 2H), 7.40 – 7.34 (m, 3H), 7.33 – 7.27 (m, 3H), 7.21 (d,  $J = 7.8$  Hz, 2H), 7.14 (d,  $J = 8.0$  Hz, 1H), 4.79 (d,  $J = 15.3$  Hz, 1H), 3.84 (d,  $J = 15.3$  Hz, 1H), 3.62 (s, 1H), 2.38 (s, 3H).

**$^{13}C$  NMR (101 MHz,  $CDCl_3$ )**  $\delta$  143.9, 136.6, 135.7, 135.2, 130.8, 129.3, 129.1, 129.0, 128.9, 128.1, 126.1, 125.5, 123.1, 69.0, 58.5, 46.3, 21.8.

**HRMS (ESI)**  $m/z$ :  $[M+Na]^+$  Calcd. for  $C_{22}H_{18}BrNO_3SNa$  478.0083, 480.0064; found: 478.0084, 480.0065.

**4-methyl-1a-phenyl-3-tosyl-1a,2,3,7b-tetrahydrooxireno[2,3-c]quinoline (8l)**

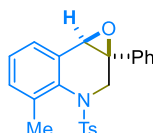

White solid, 43.2 mg, 55% yield; m.p. 148.5 – 148.8 °C

**$^1H$  NMR (400 MHz,  $CDCl_3$ )**  $\delta$  7.47 (d,  $J = 7.7$  Hz, 2H), 7.38 – 7.29 (m, 4H), 7.26 – 7.11 (m, 6H), 4.56 (d,  $J = 15.4$  Hz, 1H), 3.73 (d,  $J = 15.4$  Hz, 1H), 3.61 (s, 1H), 2.51 (s, 3H), 2.41 (s, 3H).

**$^{13}C$  NMR (101 MHz,  $CDCl_3$ )**  $\delta$  143.2, 138.4, 136.6, 136.1, 134.3, 132.7, 129.2, 129.0, 128.8, 128.6, 128.5, 127.3, 126.9, 125.6, 66.9, 58.8, 47.4, 21.7, 20.2.

**HRMS (ESI)**  $m/z$ :  $[M+Na]^+$  Calcd. for  $C_{23}H_{21}NO_3SNa$  414.1134; found: 414.1136.

**6. Procedure for the synthesis of 3-phenylquinoline 9**

In a dry round-bottom flask, the 1-(methylsulfonyl)-3-phenyl-1,2-dihydroquinoline **3i** (57.1 mg, 0.2 mmol) was added under Ar atmosphere, followed by anhydrous THF (3.5 mL) and *t*-BuOH (90  $\mu$ L), *t*-BuOK (45 mg) at 25 °C. The mixture was stirred at room temperature for 16 h. Upon reaction completion, 10% NaOH (10 mL) was added and the mixture was extracted with EtOAc, washed with water and brine, dried over  $Mg_2SO_4$ , filtered, and concentrated to afford the crude product. The product was purified by flash chromatography with MTBE/PE to provide the desired compound in 99% yield (42.2 mg) as a white solid.

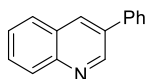

White solid, 42.2 mg, 99% yield; m.p. 51.7 – 52.4 °C

**$^1H$  NMR (300 MHz,  $CDCl_3$ )**  $\delta$  9.19 (s, 1H), 8.28 (s, 1H), 8.15 (d,  $J = 8.4$  Hz, 1H), 7.86 (d,  $J = 8.0$  Hz, 1H), 7.78 – 7.66 (m, 3H), 7.62 – 7.48 (m, 3H), 7.47 – 7.38 (m, 1H).

$^{13}\text{C}$  NMR (75 MHz,  $\text{CDCl}_3$ )  $\delta$  150.0, 147.4, 137.9, 133.9, 133.3, 129.5, 129.3, 129.2, 128.2, 128.1, 127.5, 127.1.

HRMS (ESI)  $m/z$ :  $[\text{M} + \text{H}]^+$  Calcd. for  $\text{C}_{15}\text{H}_{12}\text{N}$  206.0964; found: 206.0970.

### 7. Procedure for the synthesis of 3-phenyl-1-tosyl-1,2,3,4-tetrahydroquinoline 10

To the substrate **3a** (108.5 mg, 0.3 mmol) in a dry hydrogenation reactor was added anhydrous THF (3.0 mL) and 10% Pd/C (32.4 mg). The mixture was stirred at room temperature under a  $\text{H}_2$  atmosphere (0.8 MPa) for 18 h. Filtered with diatomite, and concentrated to afford the crude product. The product was purified by flash chromatography with MTBE/PE to provide the title compound in 99% yield (107.8 mg) as a white solid.

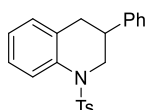

White solid, 107.8 mg, 99% yield; m.p. 127.0 – 127.6 °C

$^1\text{H}$  NMR (300 MHz,  $\text{CDCl}_3$ )  $\delta$  7.88 (d,  $J = 8.3$  Hz, 1H), 7.52 (d,  $J = 8.2$  Hz, 2H), 7.36 – 7.28 (m, 2H), 7.27 – 7.17 (m, 4H), 7.15 – 7.00 (m, 4H), 4.39 – 4.28 (m, 1H), 3.47 – 3.34 (m, 1H), 2.81 – 2.62 (m, 3H), 2.40 (s, 3H).

$^{13}\text{C}$  NMR (75 MHz,  $\text{CDCl}_3$ )  $\delta$  143.9, 141.9, 136.7, 136.4, 130.1, 129.8, 129.3, 128.9, 127.3, 127.0, 126.8, 125.1, 124.7, 52.3, 38.2, 34.5, 21.7.

HRMS (ESI)  $m/z$ :  $[\text{M} + \text{Na}]^+$  Calcd. for  $\text{C}_{22}\text{H}_{21}\text{NO}_2\text{SNa}$  386.1185; found: 386.1189.

### 8. Procedure for the synthesis of 3,7-diphenyl-1-tosyl-1,2,3,4-tetrahydroquinoline 11

Under Ar nitrogen atmosphere, compound **3f** (88.0 mg, 0.2 mmol), phenylboronic acid (36.6 mg, 0.3 mmol, 1.5 equiv),  $\text{Cs}_2\text{CO}_3$  (130.0 mg, 0.4 mmol, 2.0 equiv),  $\text{Pd}(\text{OAc})_2$  (0.20 equiv), and butyl di-1-adamantylphosphine (0.24 equiv) were successively added to a dried sealed tube, followed by the addition of 2.0 mL of DME. The resulting mixture was stirred at 80 °C for 38 h until almost full consumption of **3f** (monitored by thin layer chromatography), and then the reaction mixture was directly subjected to flash column chromatography on silica gel to afford the corresponding product **6** in 96% yield (84.1 mg) as a white solid.

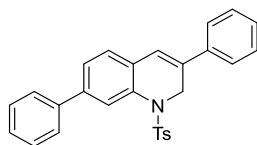

White solid, 84.1 mg, 96% yield; m.p. 152.0 – 152.9 °C

$^1\text{H}$  NMR (400 MHz,  $\text{CDCl}_3$ )  $\delta$  8.10-8.05 (m, 1H), 7.71 (d,  $J = 7.4$  Hz, 2H), 7.52 – 7.46 (m, 3H), 7.43 – 7.33 (m, 4H), 7.32 – 7.27 (m, 2H), 7.22 (d,  $J = 8.2$  Hz, 2H), 7.10 (d,  $J = 7.9$  Hz, 1H), 6.93 (d,  $J = 8.1$  Hz, 2H), 6.37 (s, 1H), 4.85 (s, 2H), 2.29 (s, 3H).

$^{13}\text{C}$  NMR (101 MHz,  $\text{CDCl}_3$ )  $\delta$  143.5, 140.8, 140.1, 137.5, 135.8, 134.8, 134.5, 129.5, 129.1, 129.0, 128.8, 128.4, 127.8, 127.4, 127.3, 127.1, 125.5, 125.4, 125.2, 121.1, 47.8, 21.6.

HRMS (ESI)  $m/z$ :  $[\text{M} + \text{Na}]^+$  Calcd. for  $\text{C}_{28}\text{H}_{23}\text{NO}_2\text{SNa}$  460.1342; found: 460.1343.

## 9. Crystal data and structure refinement

Single crystals of compound **3f** were prepared through dissolving the sample in mixture solvent of EtOH/DCM (5/1) at room temperature and crystallizing by slow evaporation of solvent. A suitable crystal was selected for structure determination on a 'Oxford Gemini E' diffractometer. The crystal was kept at 293 K during data collection. Using Olex2<sup>1</sup>, the structure was solved with the ShelXT<sup>2</sup> structure solution program using Intrinsic Phasing and refined with the ShelXL<sup>3</sup> refinement package using Least Squares minimisation.

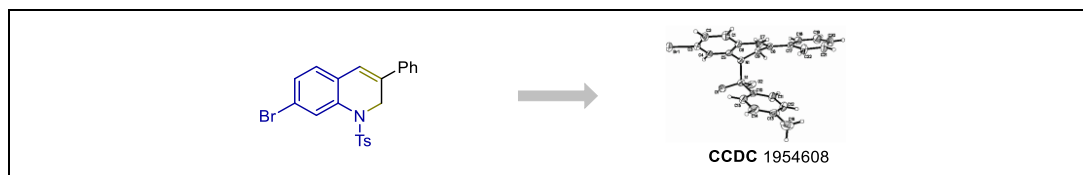

|                                             |                                                               |
|---------------------------------------------|---------------------------------------------------------------|
| Identification code                         | <b>3f</b>                                                     |
| Empirical formula                           | C <sub>22</sub> H <sub>18</sub> BrNO <sub>2</sub> S           |
| Formula weight                              | 440.34                                                        |
| Temperature/K                               | 293(2)                                                        |
| Crystal system                              | monoclinic                                                    |
| Space group                                 | P2 <sub>1</sub> /c                                            |
| a/Å                                         | 13.8433(6)                                                    |
| b/Å                                         | 14.8254(6)                                                    |
| c/Å                                         | 9.4672(4)                                                     |
| α/°                                         | 90                                                            |
| β/°                                         | 90.436(4)                                                     |
| γ/°                                         | 90                                                            |
| Volume/Å <sup>3</sup>                       | 1942.93(14)                                                   |
| Z                                           | 4                                                             |
| ρ <sub>calc</sub> /cm <sup>3</sup>          | 1.505                                                         |
| μ/mm <sup>-1</sup>                          | 4.023                                                         |
| F(000)                                      | 896.0                                                         |
| Crystal size/mm <sup>3</sup>                | 0.13 × 0.1 × 0.09                                             |
| Radiation                                   | CuKα (λ = 1.54184)                                            |
| 2θ range for data collection/°              | 8.74 to 134.158                                               |
| Index ranges                                | -16 ≤ h ≤ 16, -17 ≤ k ≤ 12, -11 ≤ l ≤ 9                       |
| Reflections collected                       | 7440                                                          |
| Independent reflections                     | 3462 [R <sub>int</sub> = 0.0361, R <sub>sigma</sub> = 0.0489] |
| Data/restraints/parameters                  | 3462/0/233                                                    |
| Goodness-of-fit on F <sup>2</sup>           | 1.038                                                         |
| Final R indexes [I >= 2σ (I)]               | R <sub>1</sub> = 0.0482, wR <sub>2</sub> = 0.1235             |
| Final R indexes [all data]                  | R <sub>1</sub> = 0.0685, wR <sub>2</sub> = 0.1389             |
| Largest diff. peak/hole / e Å <sup>-3</sup> | 0.37/-0.42                                                    |

1. Dolomanov, O. V., Bourhis, L.J., Gildea, R.J, Howard, J.A.K. & Puschmann, H. *J. Appl. Cryst.* **2009**, *42*, 339-341.
2. Sheldrick, G. M. *Acta Cryst.* **2008**. *A64*, 112-122.
3. Sheldrick, G. M. *Acta Cryst.* **2015**. *C71*, 3-8

Single crystals of compound **6b** were prepared through dissolving the sample in mixture solvent of EtOH/DCM (4/1) at room temperature and crystalizing by slow evaporation of solvent. A suitable crystal was selected for structure determination on a 'Oxford Gemini E' diffractometer. The crystal was kept at 293 K during data collection. Using Olex2<sup>1</sup>, the structure was solved with the ShelXT<sup>2</sup> structure solution program using Intrinsic Phasing and refined with the ShelXL<sup>3</sup> refinement package using Least Squares minimisation.

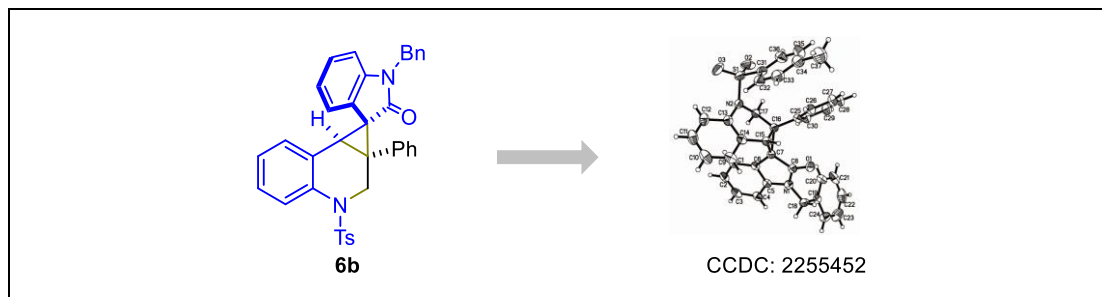

|                                             |                                                                 |
|---------------------------------------------|-----------------------------------------------------------------|
| Identification code                         | <b>6b</b>                                                       |
| Empirical formula                           | C <sub>37</sub> H <sub>30</sub> N <sub>2</sub> O <sub>3</sub> S |
| Formula weight                              | 582.69                                                          |
| Temperature/K                               | 293(2)                                                          |
| Crystal system                              | monoclinic                                                      |
| Space group                                 | P2 <sub>1</sub> /n                                              |
| a/Å                                         | 13.5153(3)                                                      |
| b/Å                                         | 7.31558(19)                                                     |
| c/Å                                         | 30.8108(7)                                                      |
| α/°                                         | 90                                                              |
| β/°                                         | 98.412(2)                                                       |
| γ/°                                         | 90                                                              |
| Volume/Å <sup>3</sup>                       | 3013.55(12)                                                     |
| Z                                           | 4                                                               |
| ρ <sub>calc</sub> /cm <sup>3</sup>          | 1.284                                                           |
| μ/mm <sup>-1</sup>                          | 1.271                                                           |
| F(000)                                      | 1224.0                                                          |
| Crystal size/mm <sup>3</sup>                | 0.15 × 0.12 × 0.09                                              |
| Radiation                                   | CuKα (λ = 1.54184)                                              |
| 2θ range for data collection/°              | 6.82 to 134.156                                                 |
| Index ranges                                | -16 ≤ h ≤ 13, -8 ≤ k ≤ 5, -34 ≤ l ≤ 36                          |
| Reflections collected                       | 10849                                                           |
| Independent reflections                     | 5374 [R <sub>int</sub> = 0.0289, R <sub>sigma</sub> = 0.0414]   |
| Data/restraints/parameters                  | 5374/0/389                                                      |
| Goodness-of-fit on F <sup>2</sup>           | 1.017                                                           |
| Final R indexes [I ≥ 2σ (I)]                | R <sub>1</sub> = 0.0533, wR <sub>2</sub> = 0.1361               |
| Final R indexes [all data]                  | R <sub>1</sub> = 0.0797, wR <sub>2</sub> = 0.1571               |
| Largest diff. peak/hole / e Å <sup>-3</sup> | 0.18/-0.27                                                      |

1. Dolomanov, O. V., Bourhis, L.J., Gildea, R.J, Howard, J.A.K. & Puschmann, H. *J. Appl. Cryst.* **2009**, *42*, 339-341.
2. Sheldrick, G. M. *Acta Cryst.* **2008**, *A64*, 112-122.
3. Sheldrick, G. M. *Acta Cryst.* **2015**, *C71*, 3-8

Single crystals of compound **8a** were prepared through dissolving the sample in mixture solvent of EtOH/DCM (1/1) at room temperature and crystalizing by slow evaporation of solvent. A suitable crystal was selected for structure determination on a 'Oxford Gemini E' diffractometer. The crystal was kept at 293 K during data collection. Using Olex2<sup>1</sup>, the structure was solved with the ShelXT<sup>2</sup> structure solution program using Intrinsic Phasing and refined with the ShelXL<sup>3</sup> refinement package using Least Squares minimisation.

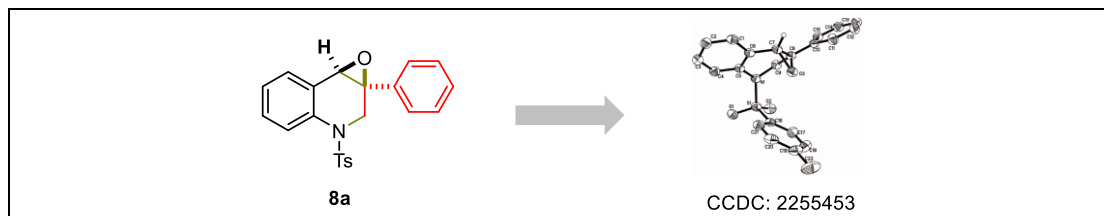

|                                             |                                                               |
|---------------------------------------------|---------------------------------------------------------------|
| Identification code                         | <b>8a</b>                                                     |
| Empirical formula                           | C <sub>22</sub> H <sub>19</sub> NO <sub>3</sub> S             |
| Formula weight                              | 377.44                                                        |
| Temperature/K                               | 293(2)                                                        |
| Crystal system                              | triclinic                                                     |
| Space group                                 | P-1                                                           |
| a/Å                                         | 8.3137(4)                                                     |
| b/Å                                         | 10.2800(9)                                                    |
| c/Å                                         | 11.9158(9)                                                    |
| α/°                                         | 67.229(8)                                                     |
| β/°                                         | 81.908(5)                                                     |
| γ/°                                         | 89.234(5)                                                     |
| Volume/Å <sup>3</sup>                       | 928.71(13)                                                    |
| Z                                           | 2                                                             |
| ρ <sub>calc</sub> /cm <sup>3</sup>          | 1.350                                                         |
| μ/mm <sup>-1</sup>                          | 1.733                                                         |
| F(000)                                      | 396.0                                                         |
| Crystal size/mm <sup>3</sup>                | 0.18 × 0.12 × 0.1                                             |
| Radiation                                   | CuKα (λ = 1.54184)                                            |
| 2θ range for data collection/°              | 8.136 to 134.14                                               |
| Index ranges                                | -5 ≤ h ≤ 9, -12 ≤ k ≤ 11, -14 ≤ l ≤ 14                        |
| Reflections collected                       | 6490                                                          |
| Independent reflections                     | 3313 [R <sub>int</sub> = 0.0222, R <sub>sigma</sub> = 0.0323] |
| Data/restraints/parameters                  | 3313/0/246                                                    |
| Goodness-of-fit on F <sup>2</sup>           | 1.036                                                         |
| Final R indexes [I >= 2σ (I)]               | R <sub>1</sub> = 0.0441, wR <sub>2</sub> = 0.1236             |
| Final R indexes [all data]                  | R <sub>1</sub> = 0.0533, wR <sub>2</sub> = 0.1340             |
| Largest diff. peak/hole / e Å <sup>-3</sup> | 0.20/-0.25                                                    |

1. Dolomanov, O. V., Bourhis, L.J., Gildea, R.J, Howard, J.A.K. & Puschmann, H. *J. Appl. Cryst.* **2009**, *42*, 339-341.
2. Sheldrick, G. M. *Acta Cryst.* **2008**, *A64*, 112-122.
3. Sheldrick, G. M. *Acta Cryst.* **2015**, *C71*, 3-8

10.  $^1\text{H}$ ,  $^{13}\text{C}$  NMR spectra for compounds 3, 6, 8, 9, 10, and 11

$^1\text{H}$  NMR (300 MHz,  $\text{CDCl}_3$ ) of 3a

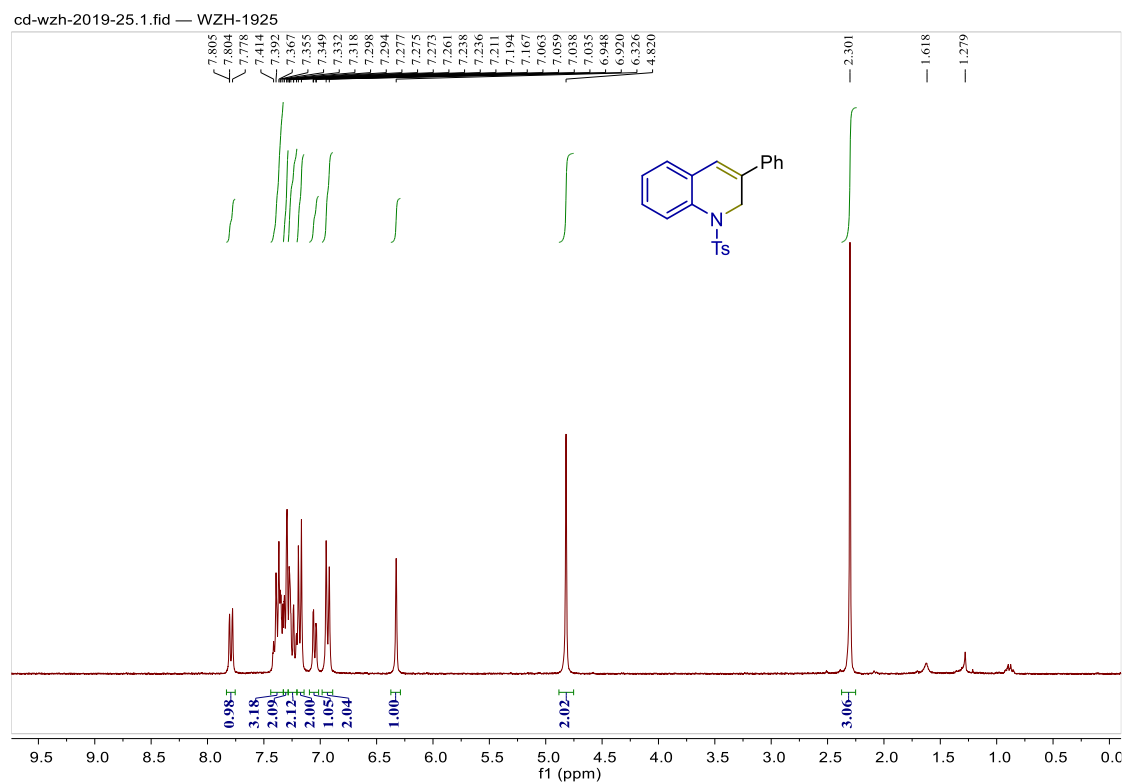

$^{13}\text{C}$  NMR (75 MHz,  $\text{CDCl}_3$ ) of 3a

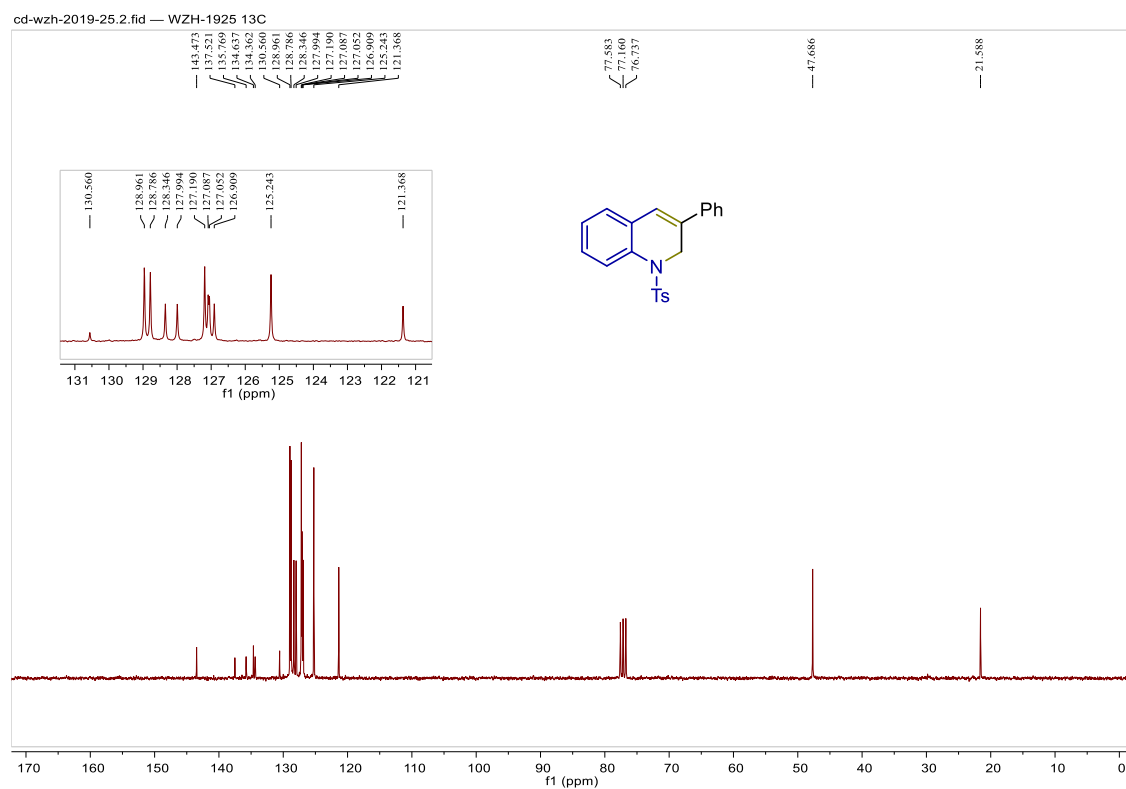



# <sup>1</sup>H NMR (300 MHz, CDCl<sub>3</sub>) of **3b**

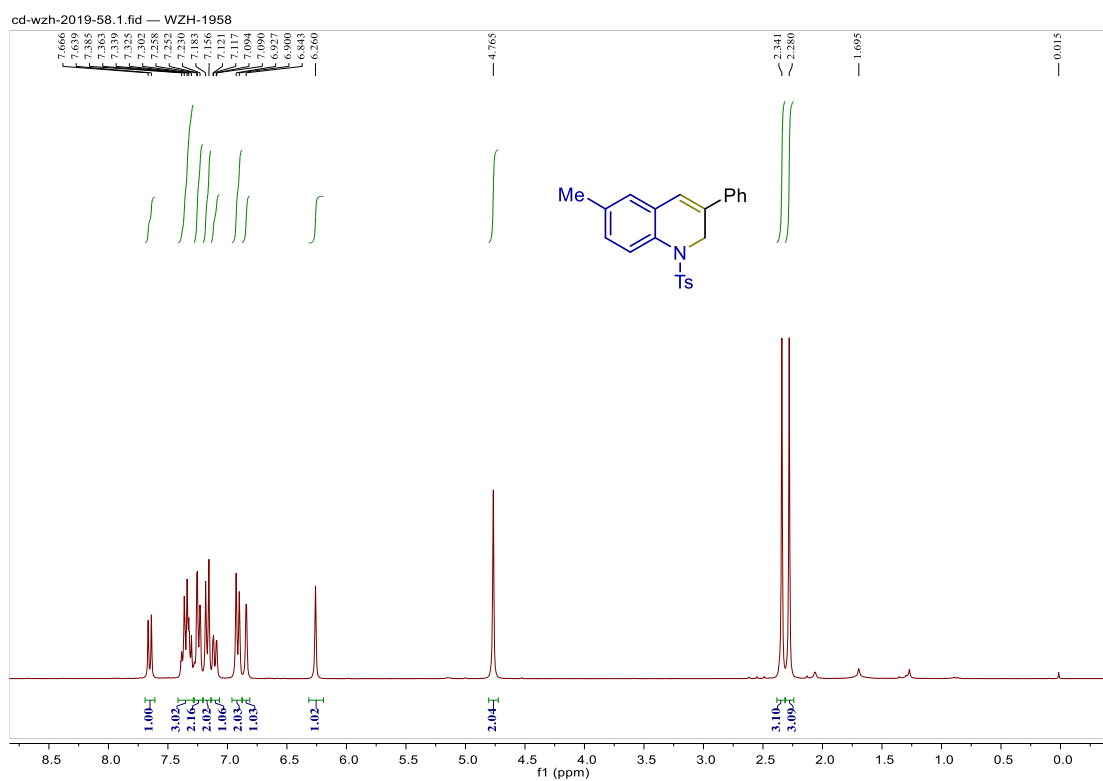

# <sup>13</sup>C NMR (75 MHz, CDCl<sub>3</sub>) of **3b**

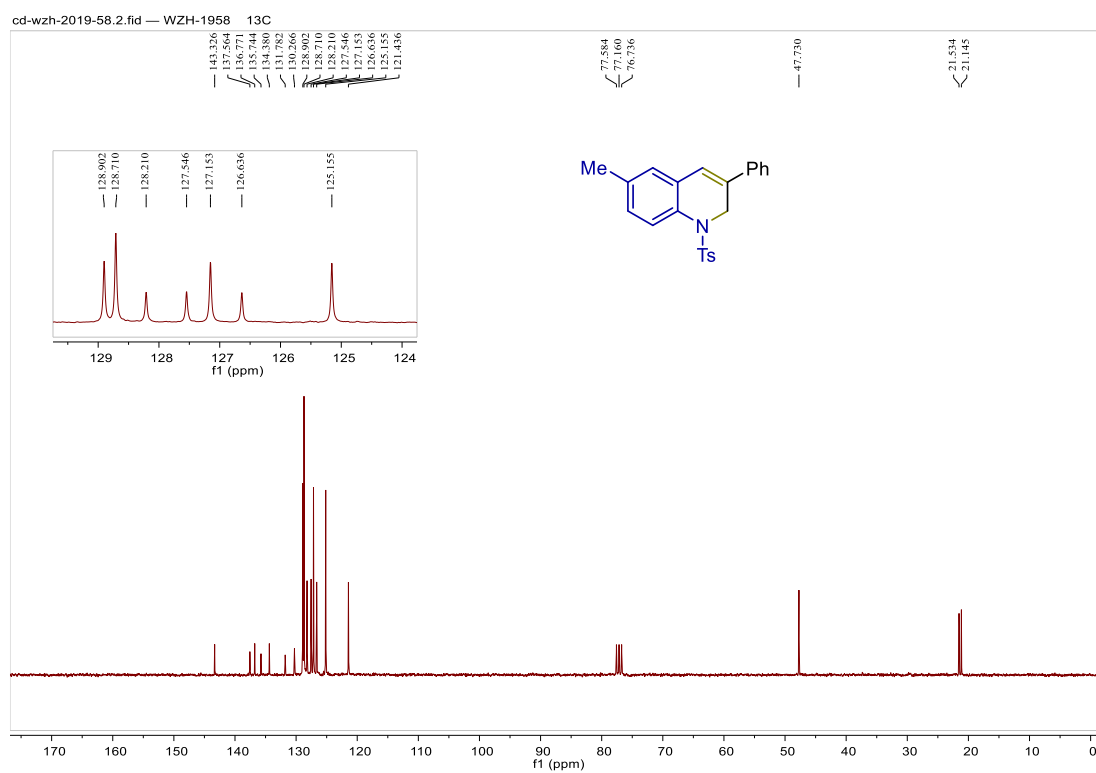

<sup>1</sup>H NMR (300 MHz, CDCl<sub>3</sub>) of **3c**

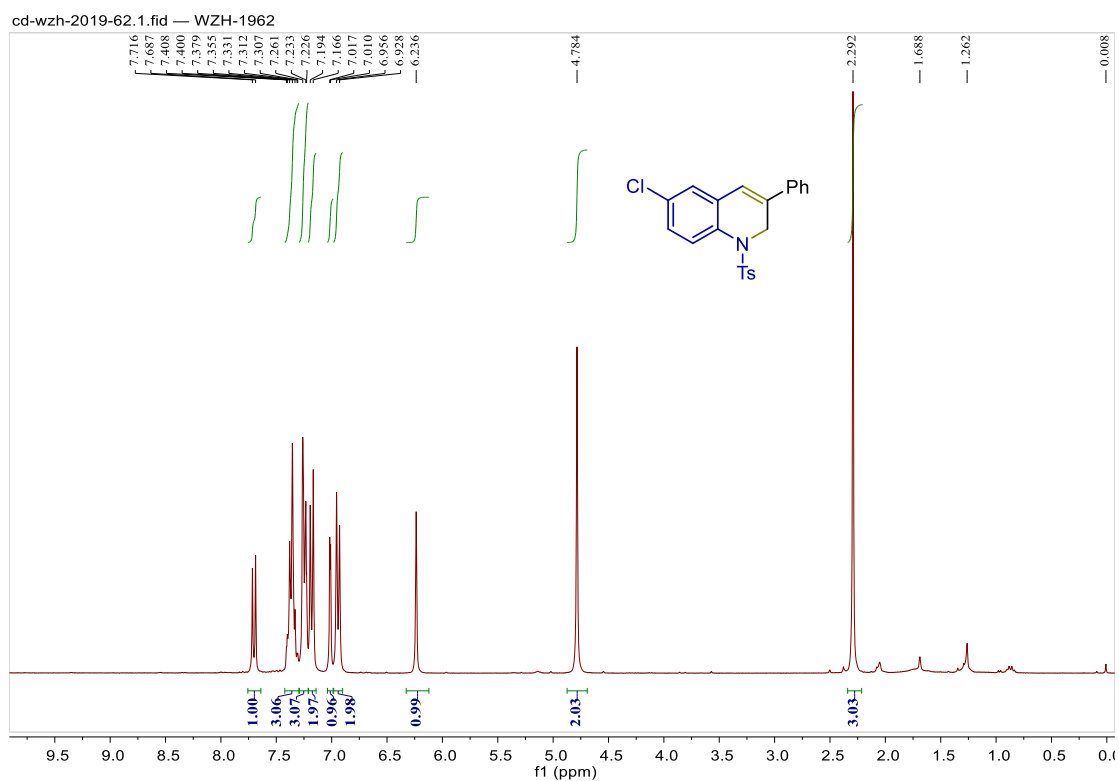

<sup>13</sup>C NMR (75 MHz, CDCl<sub>3</sub>) of **3c**

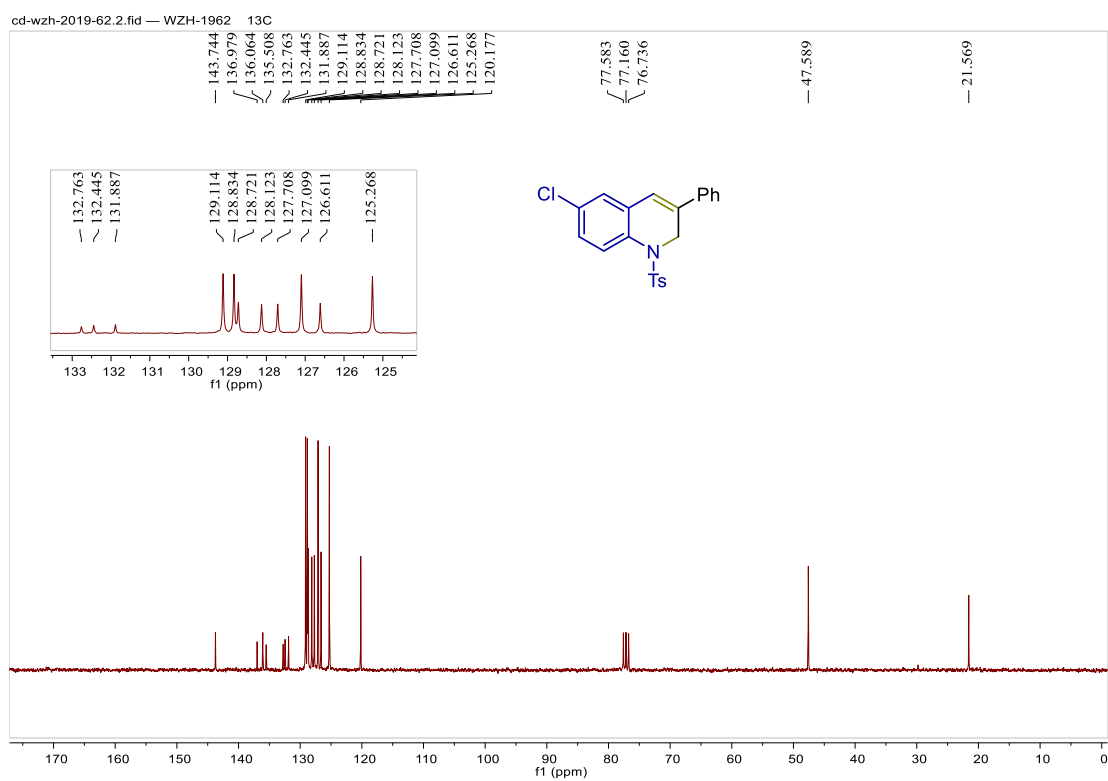

<sup>1</sup>H NMR (300 MHz, CDCl<sub>3</sub>) of **3d**

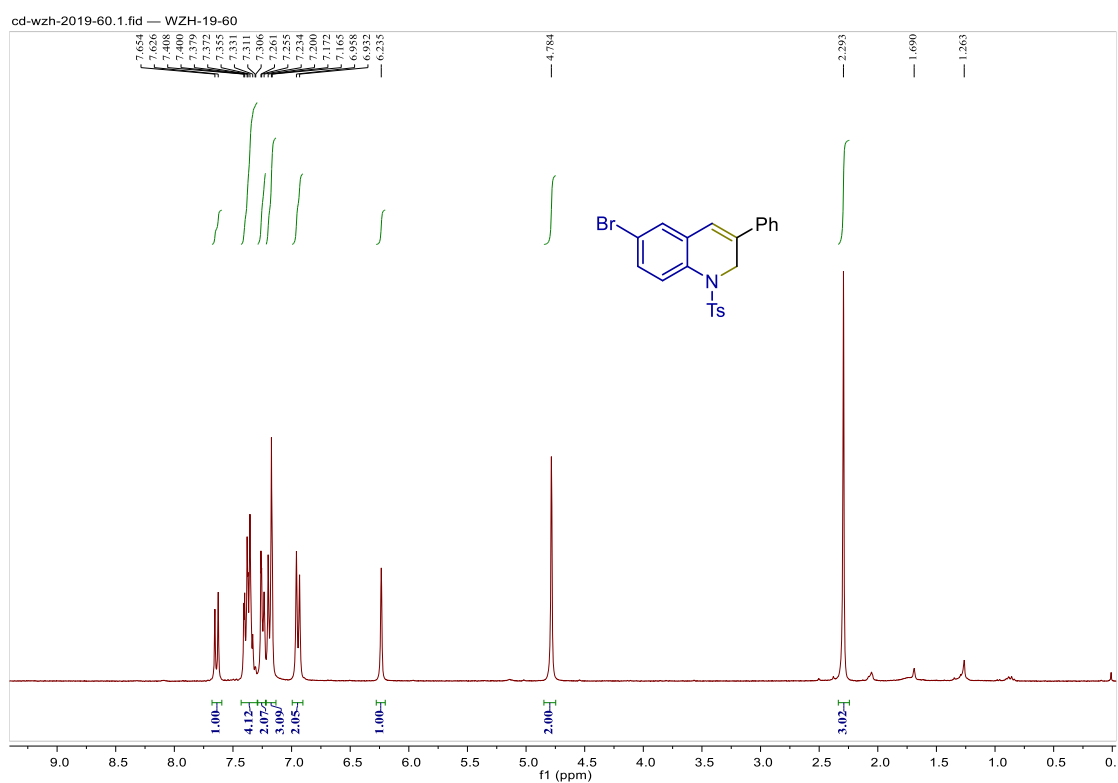

<sup>13</sup>C NMR (75 MHz, CDCl<sub>3</sub>) of **3d**

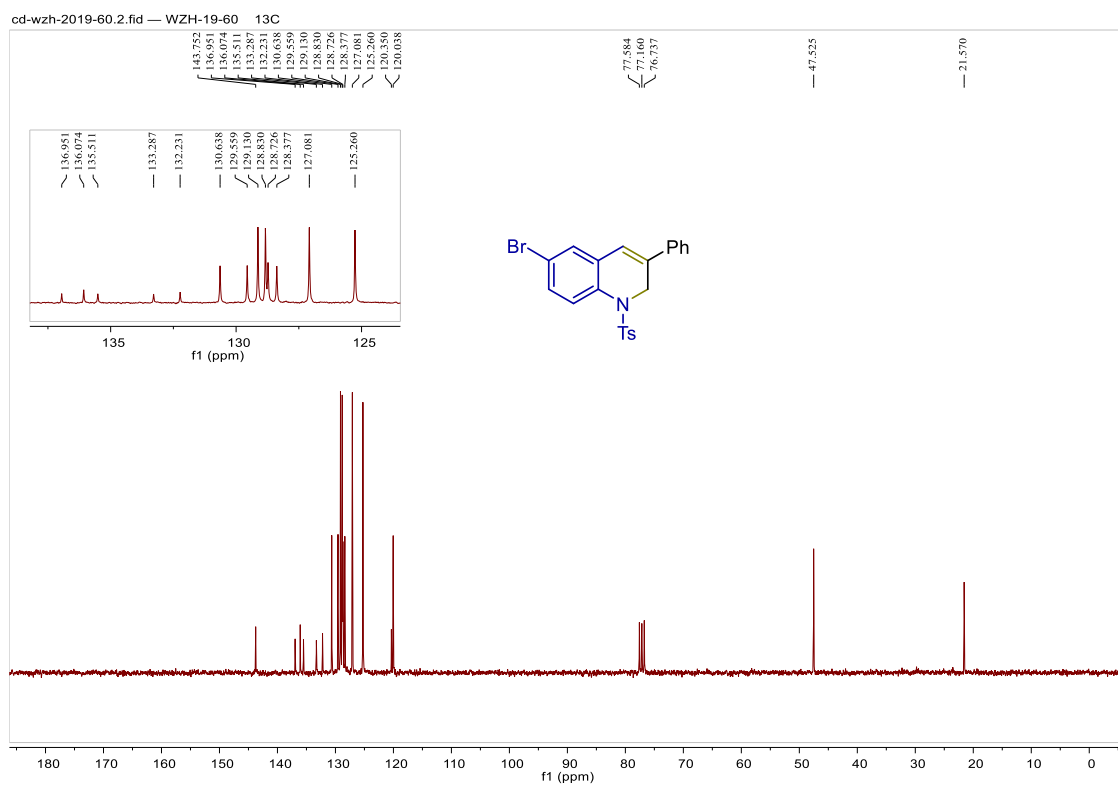

<sup>1</sup>H NMR (300 MHz, CDCl<sub>3</sub>) of **3e**

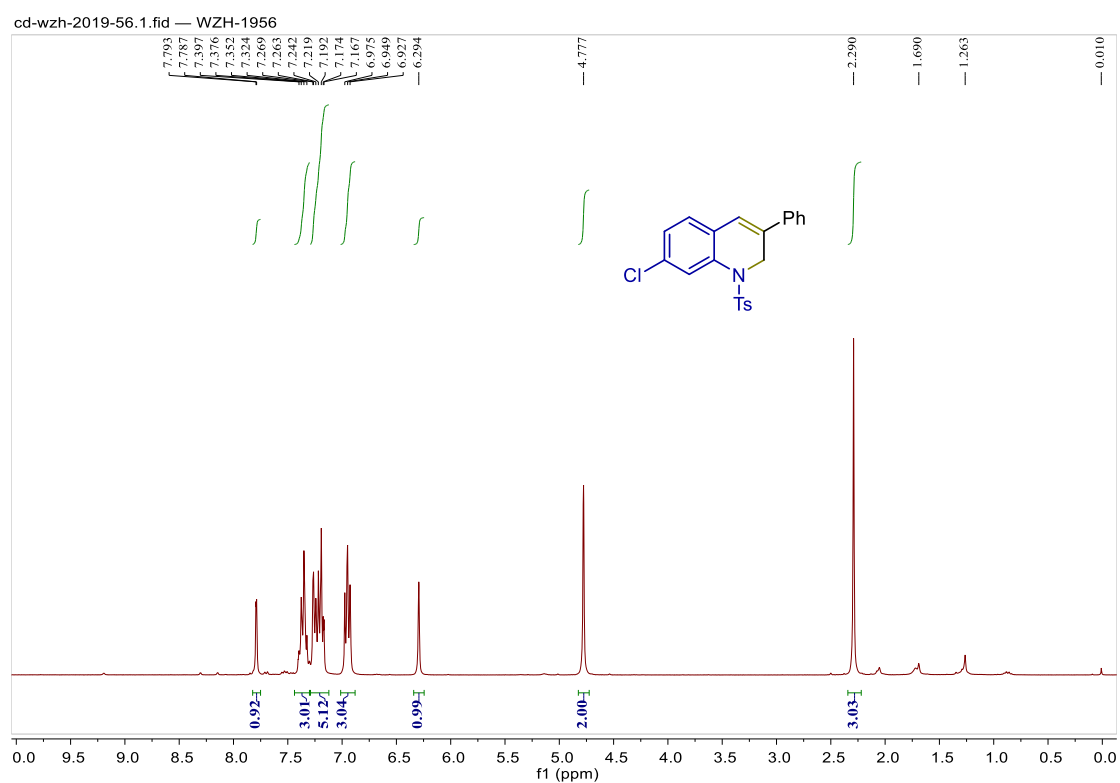

<sup>13</sup>C NMR (75 MHz, CDCl<sub>3</sub>) of **3e**

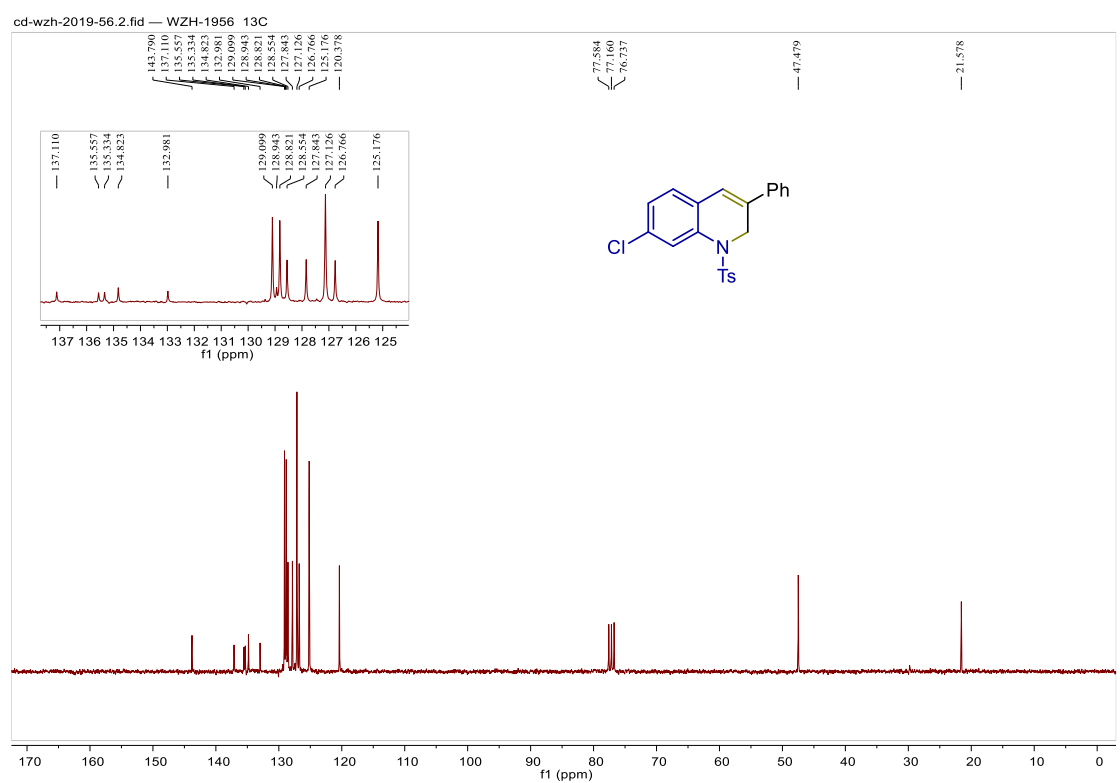

<sup>1</sup>H NMR (400 MHz, CDCl<sub>3</sub>) of **3f**

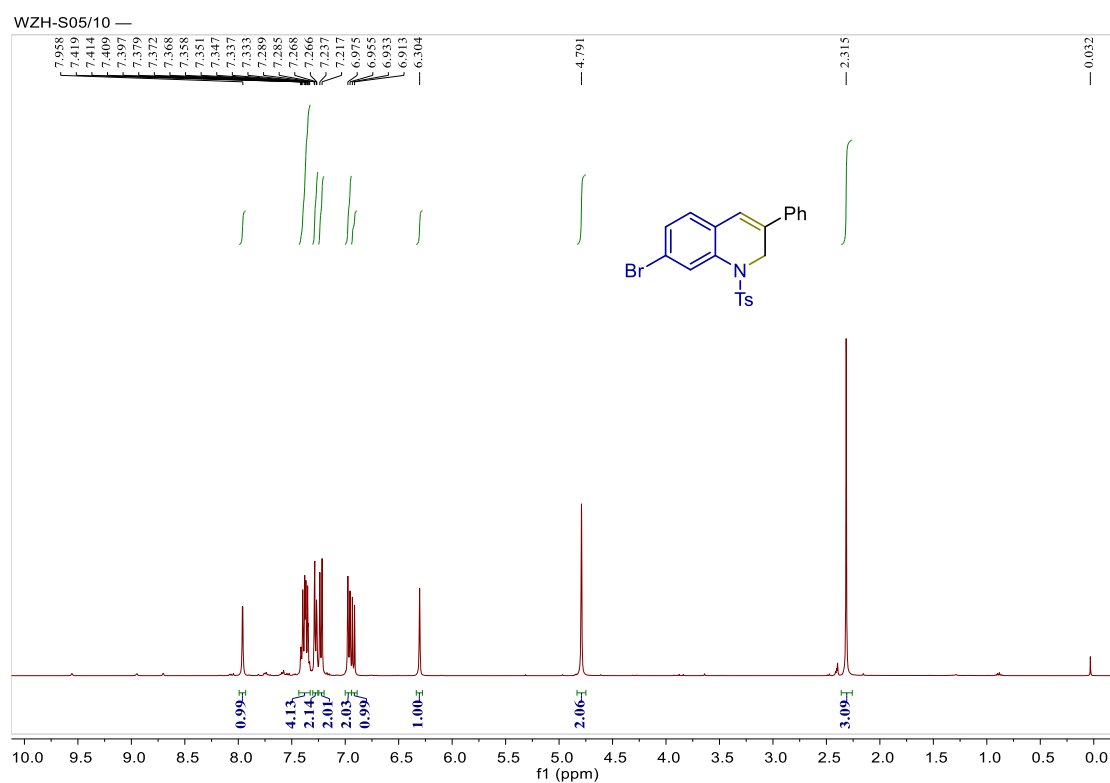

<sup>13</sup>C NMR (101 MHz, CDCl<sub>3</sub>) of **3f**

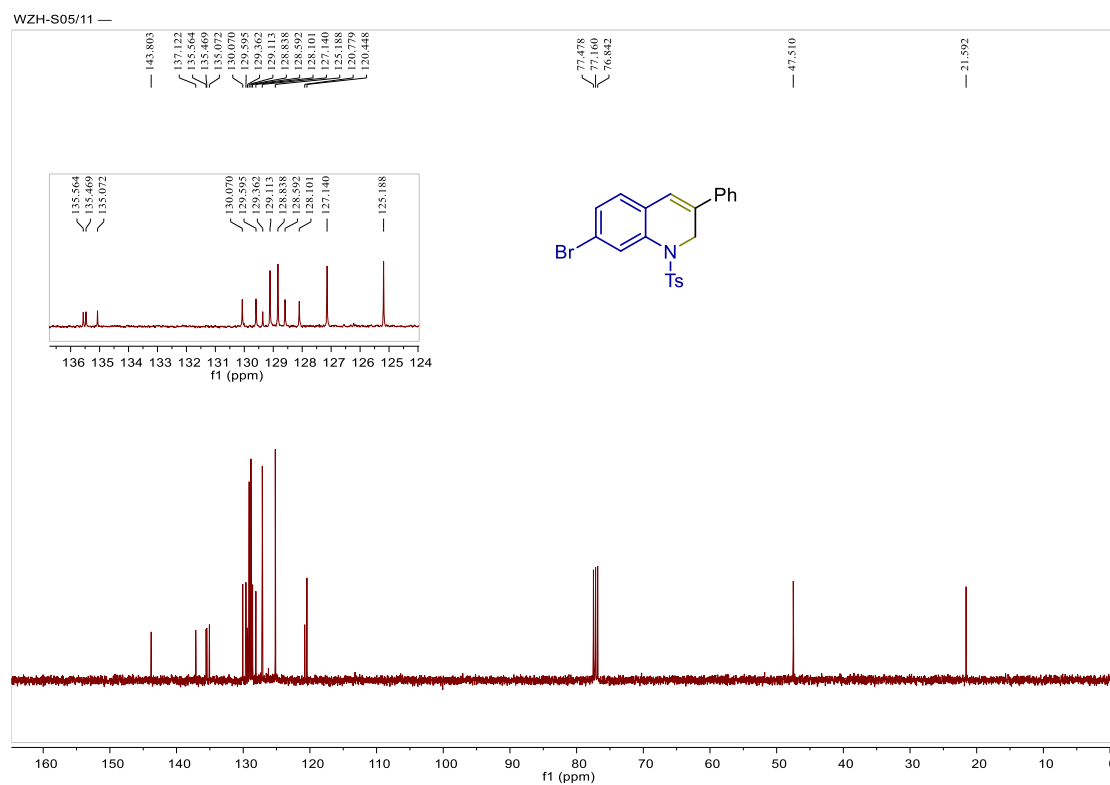

### <sup>1</sup>H NMR (300 MHz, CDCl<sub>3</sub>) of **3g**

cd-wzh-2019-57.1.fid — WZH-19-57

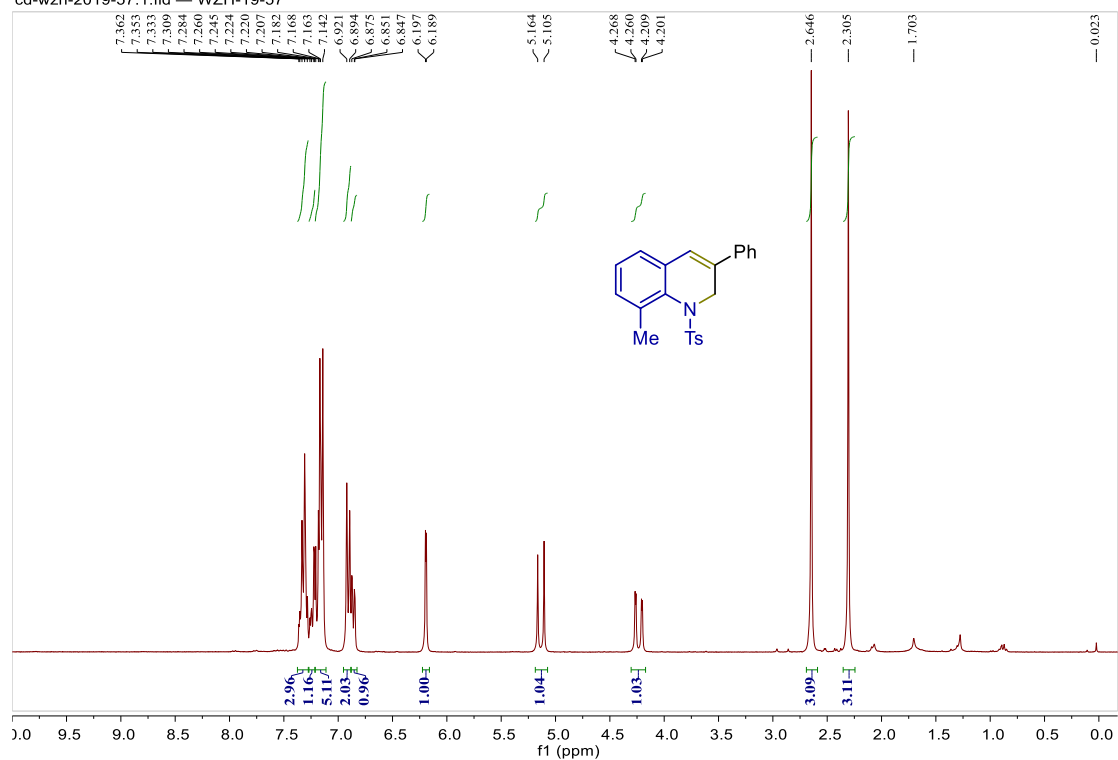

### <sup>13</sup>C NMR (75 MHz, CDCl<sub>3</sub>) of **3g**

cd-wzh-2019-57.2.fid — WZH-19-57 13C

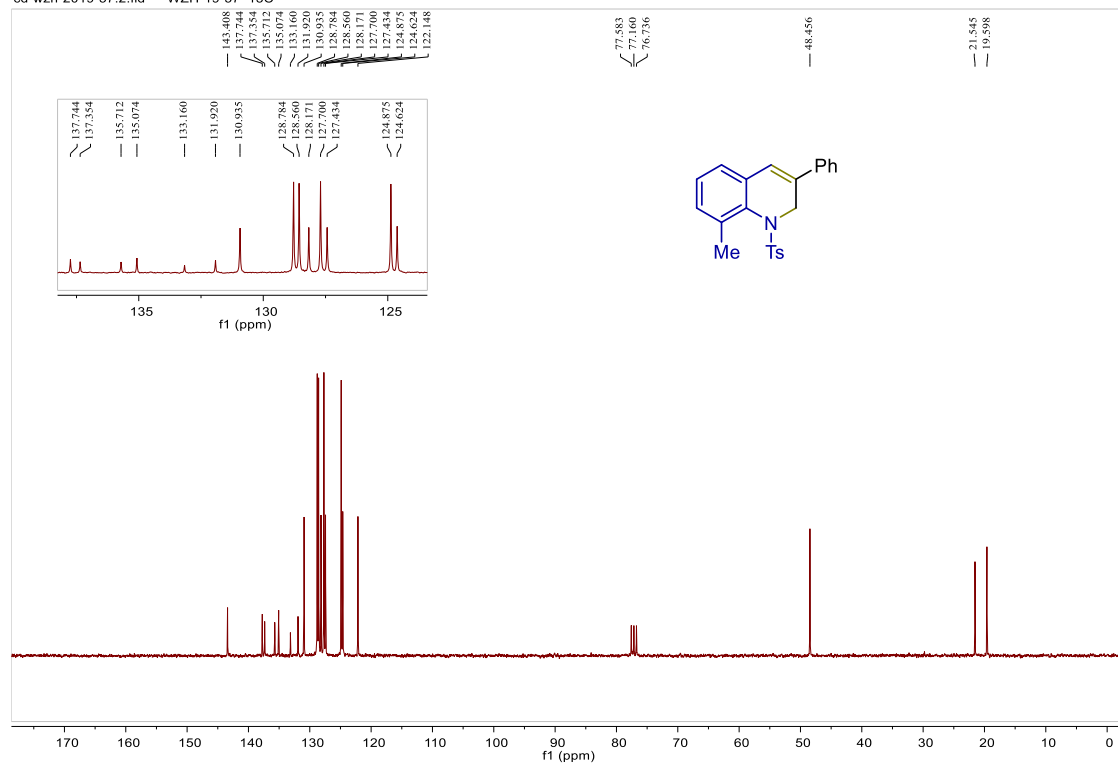

<sup>1</sup>H NMR (400 MHz, CDCl<sub>3</sub>) of **3h**

WZH-2019-04/10

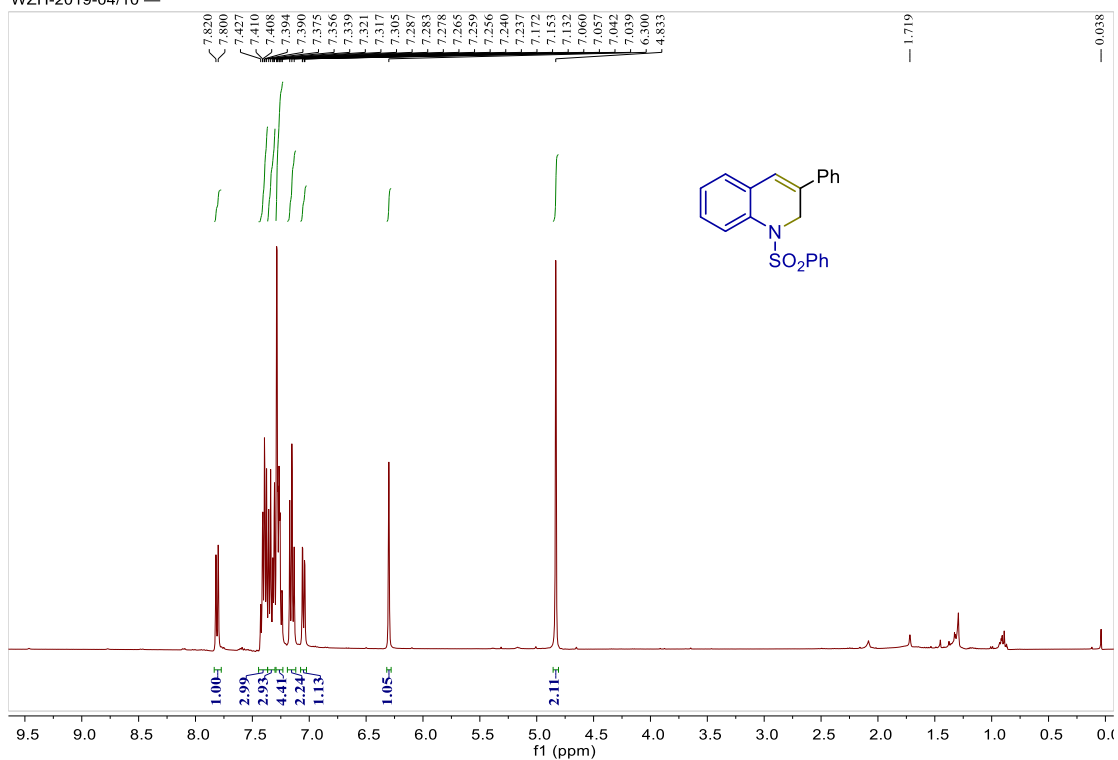

<sup>13</sup>C NMR (101 MHz, CDCl<sub>3</sub>) of **3h**

WZH-2019-04/11

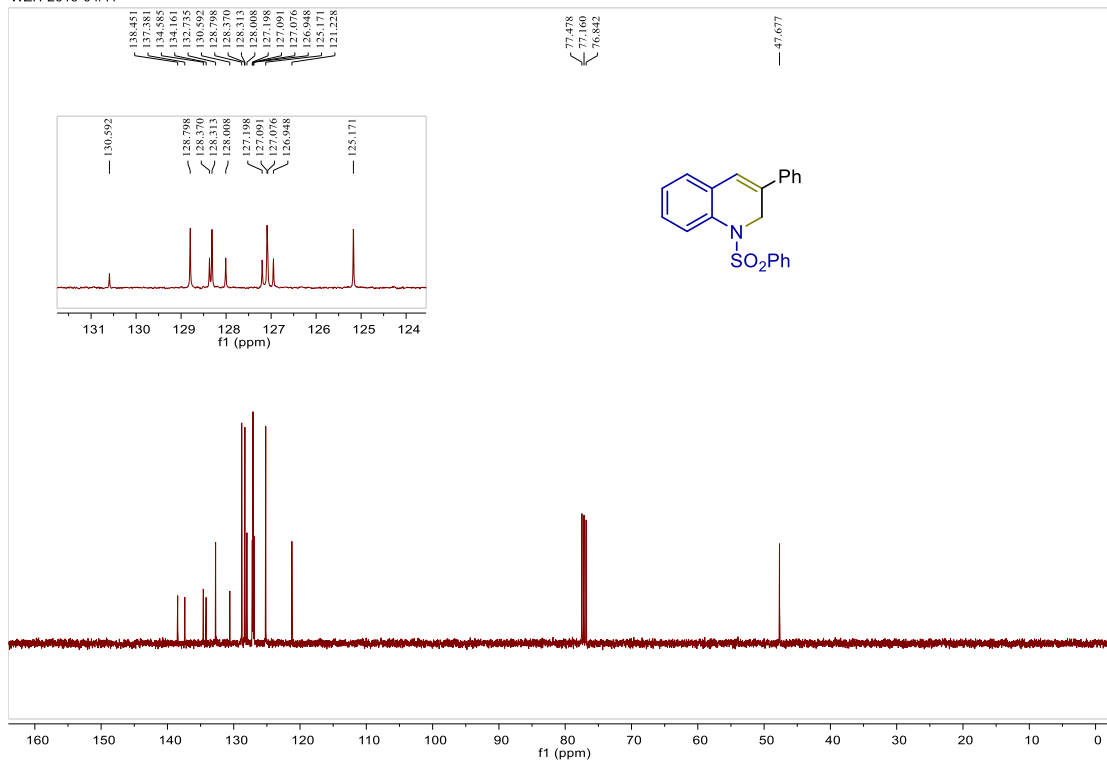

<sup>1</sup>H NMR (300 MHz, CDCl<sub>3</sub>) of **3i**

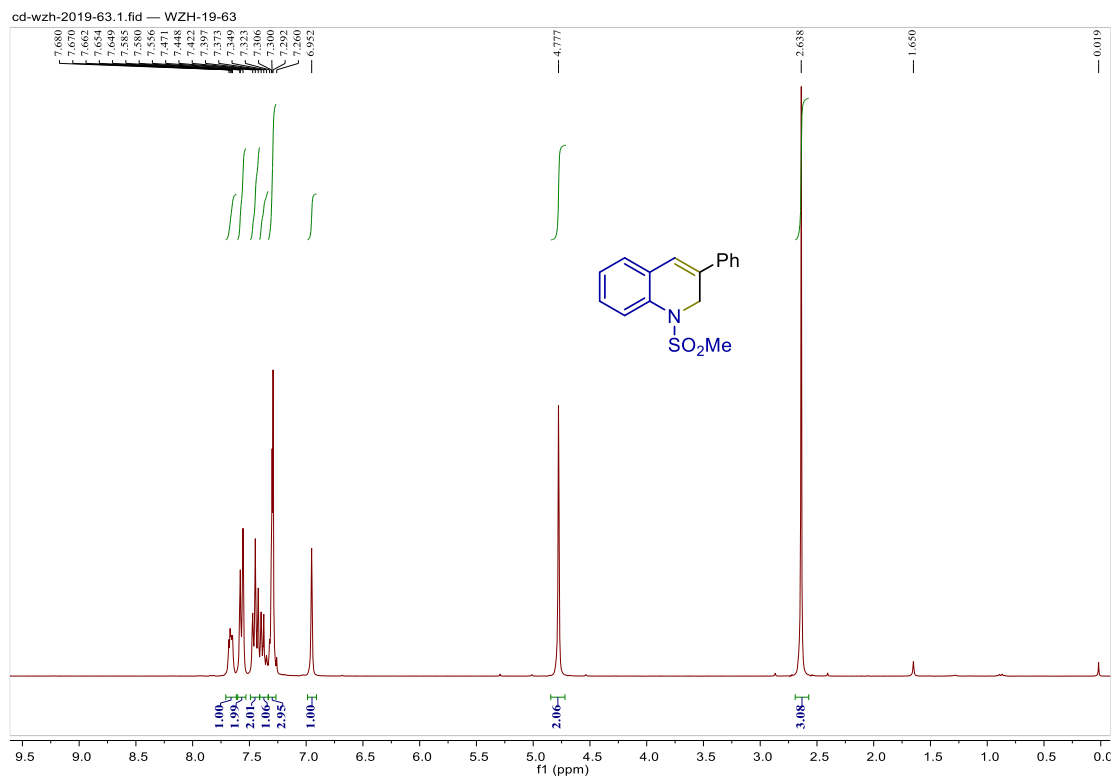

<sup>13</sup>C NMR (75 MHz, CDCl<sub>3</sub>) of **3i**

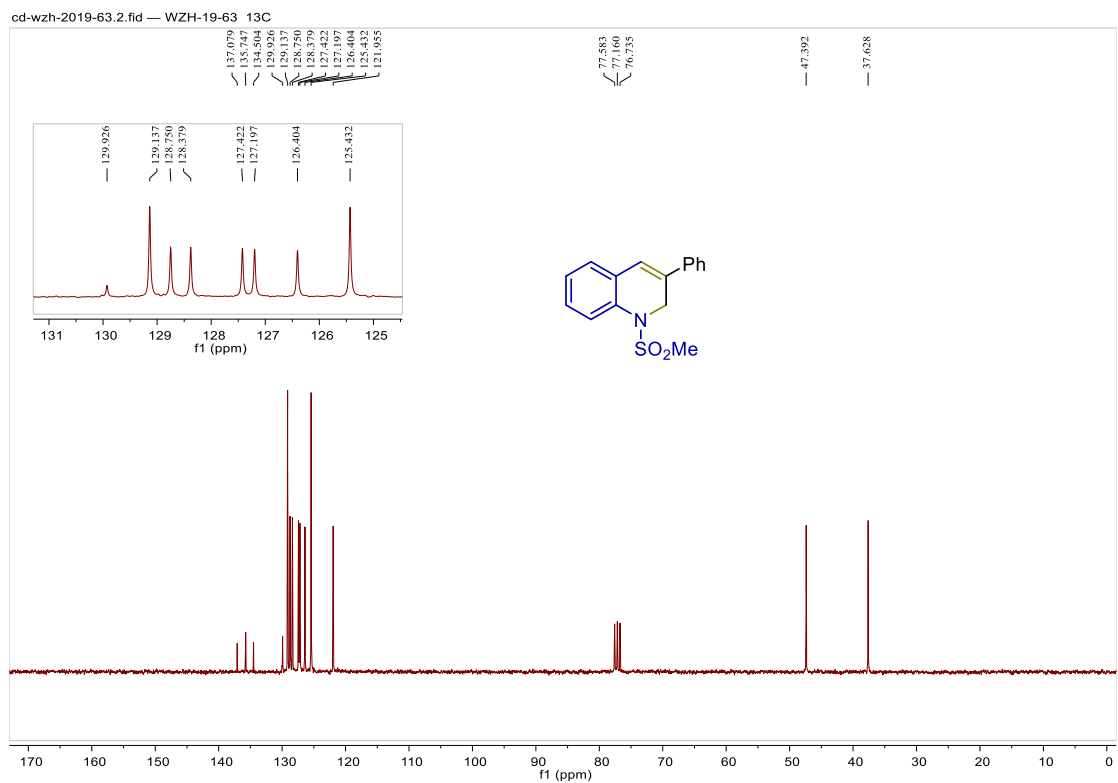



<sup>1</sup>H NMR (400 MHz, CDCl<sub>3</sub>) of **3j**

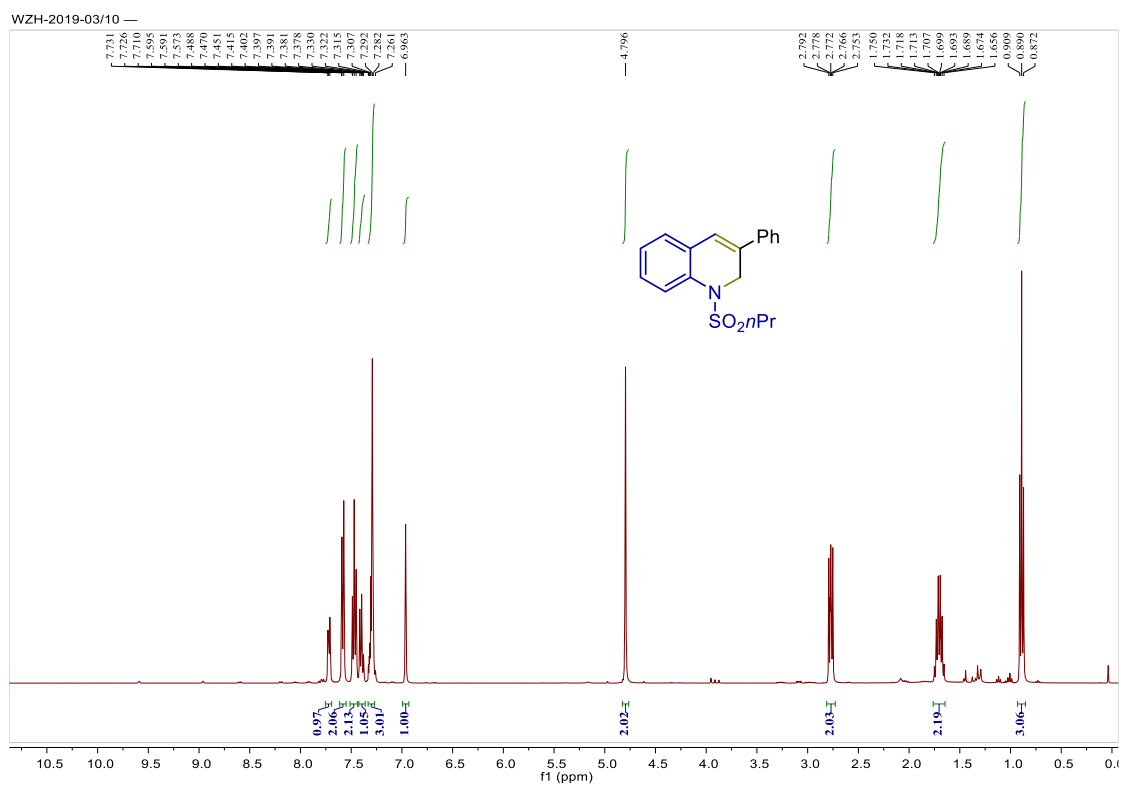

<sup>13</sup>C NMR (101 MHz, CDCl<sub>3</sub>) of **3j**

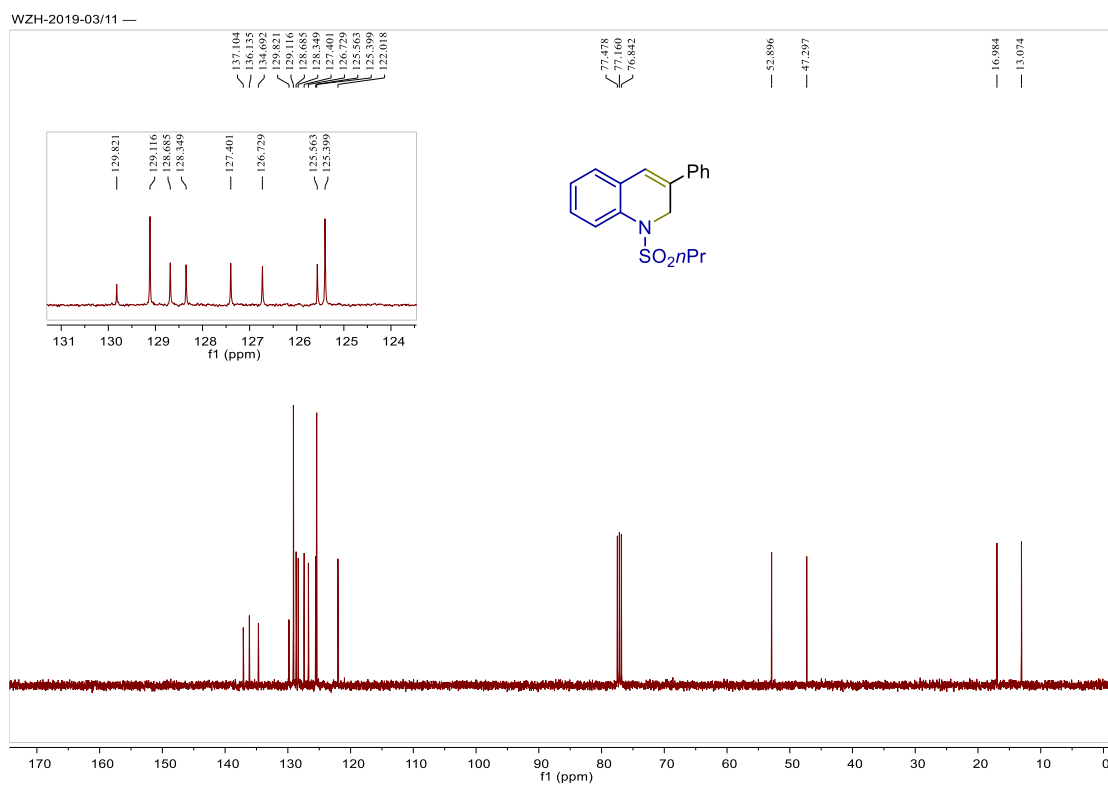

<sup>1</sup>H NMR (400 MHz, CDCl<sub>3</sub>) of **3k**

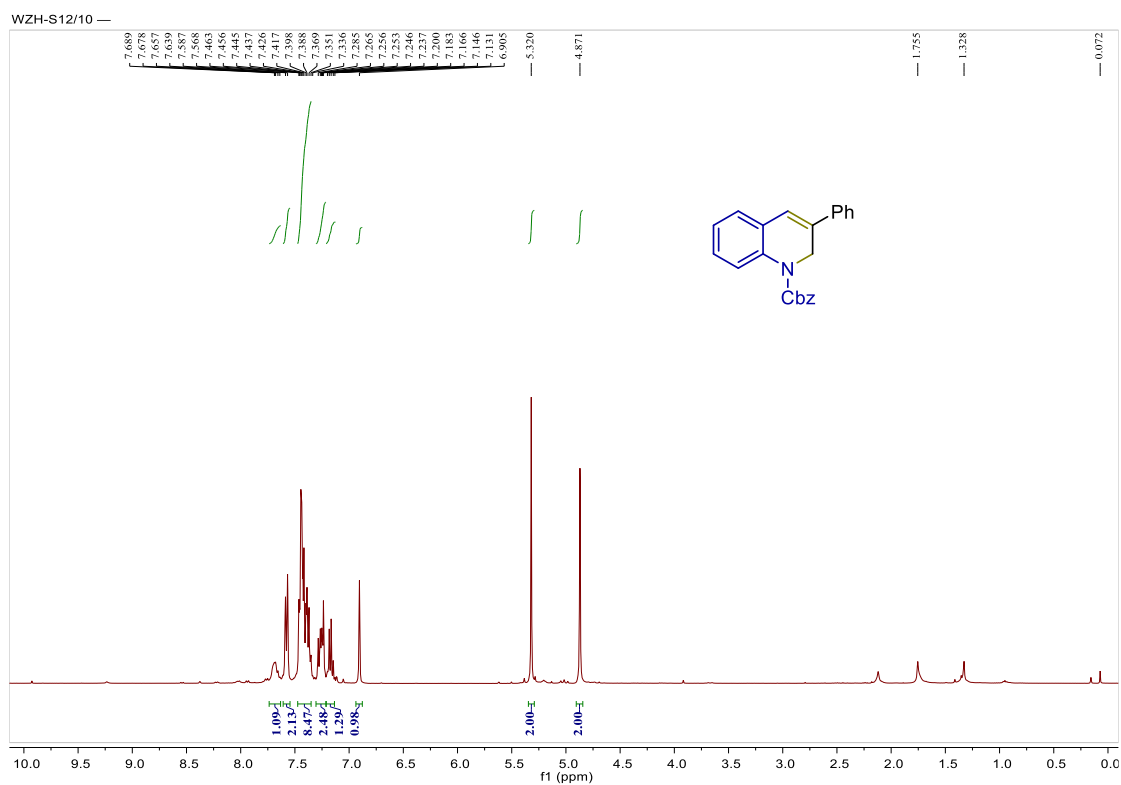

<sup>13</sup>C NMR (101 MHz, CDCl<sub>3</sub>) of **3k**

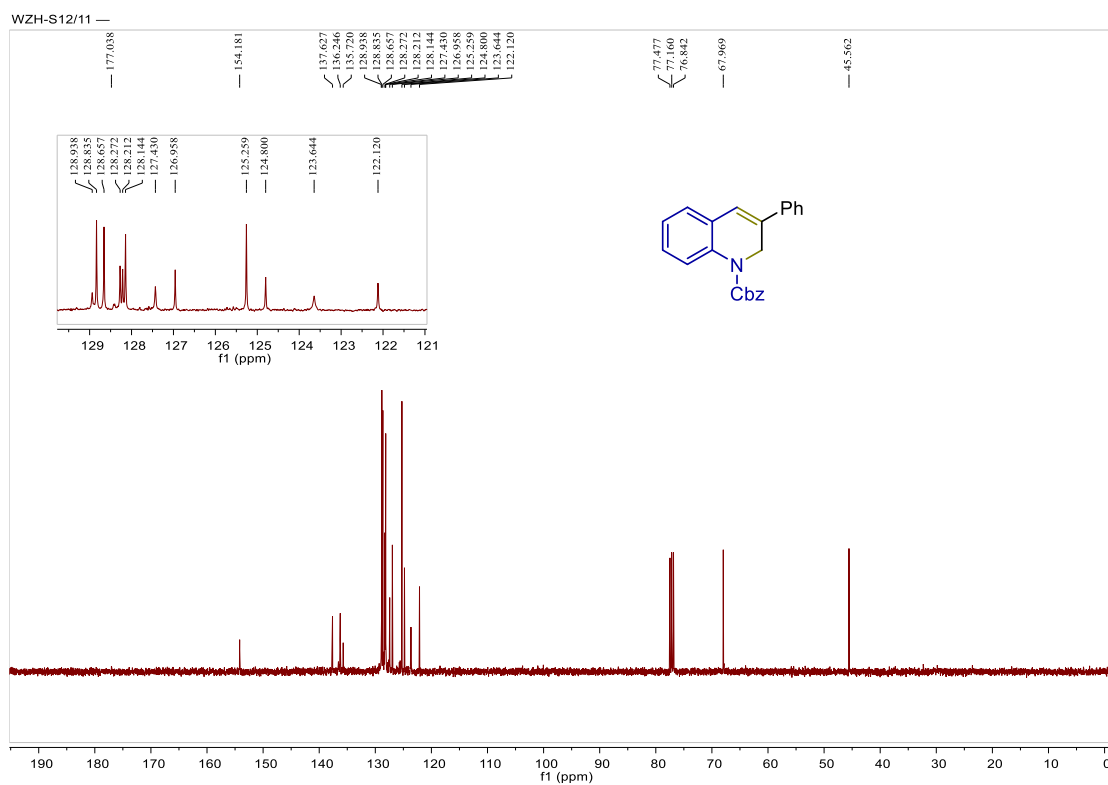

### <sup>1</sup>H NMR (300 MHz, CDCl<sub>3</sub>) of **31**

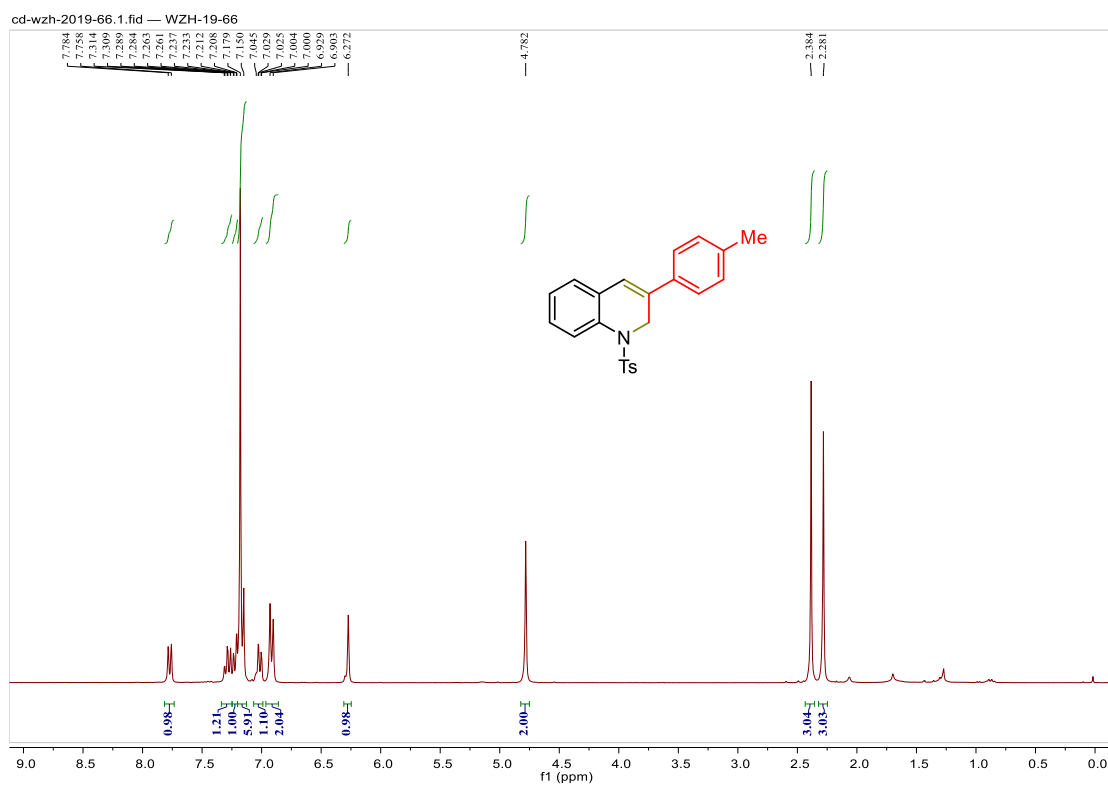

### <sup>13</sup>C NMR (75 MHz, CDCl<sub>3</sub>) of **31**

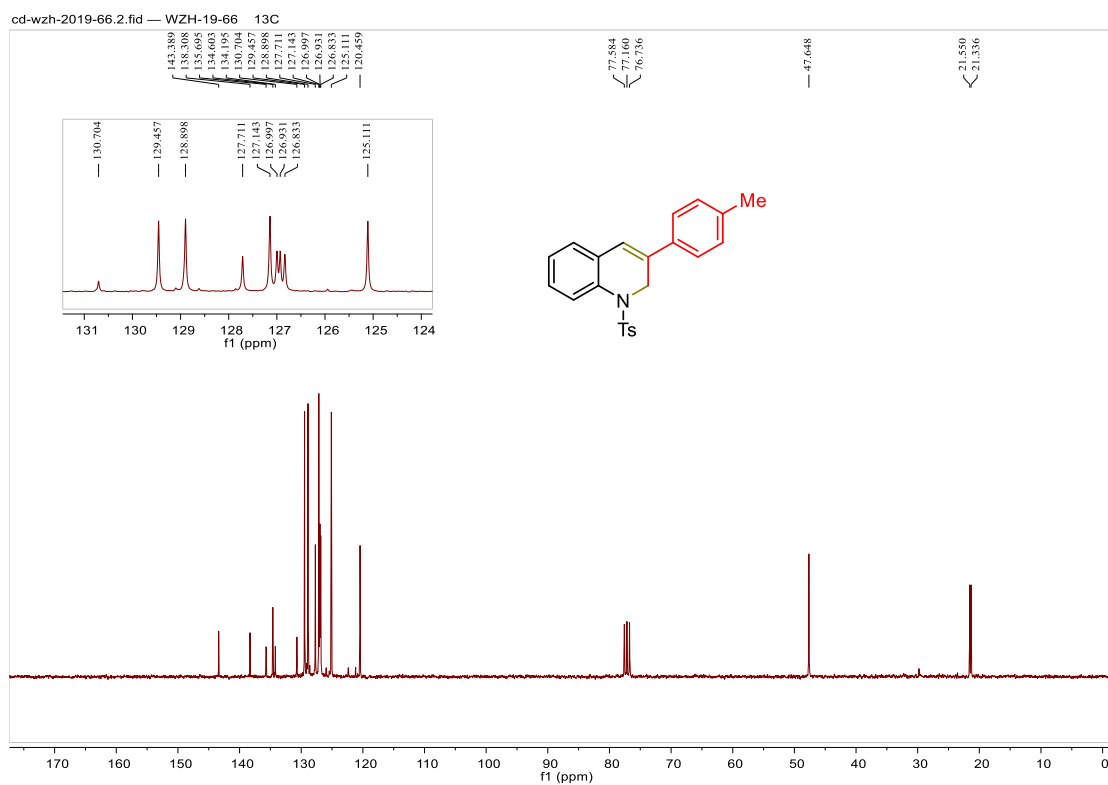

### <sup>1</sup>H NMR (300 MHz, CDCl<sub>3</sub>) of **3m**

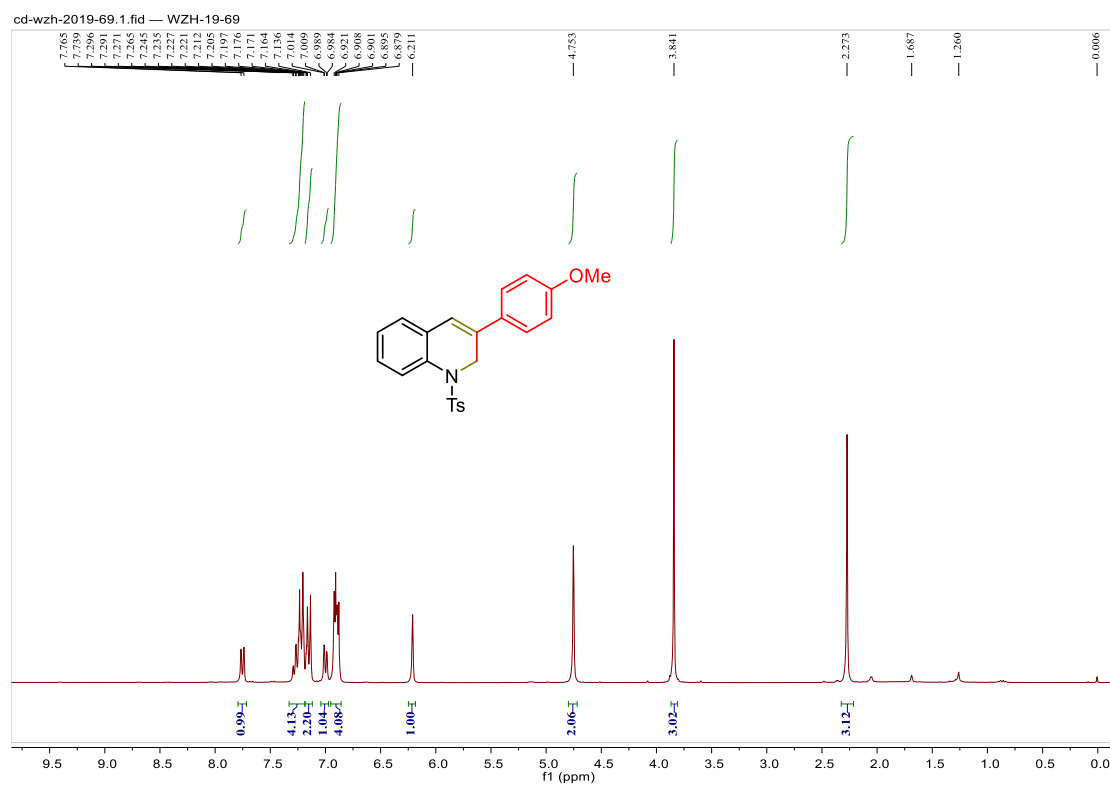

### <sup>13</sup>C NMR (75 MHz, CDCl<sub>3</sub>) of **3m**

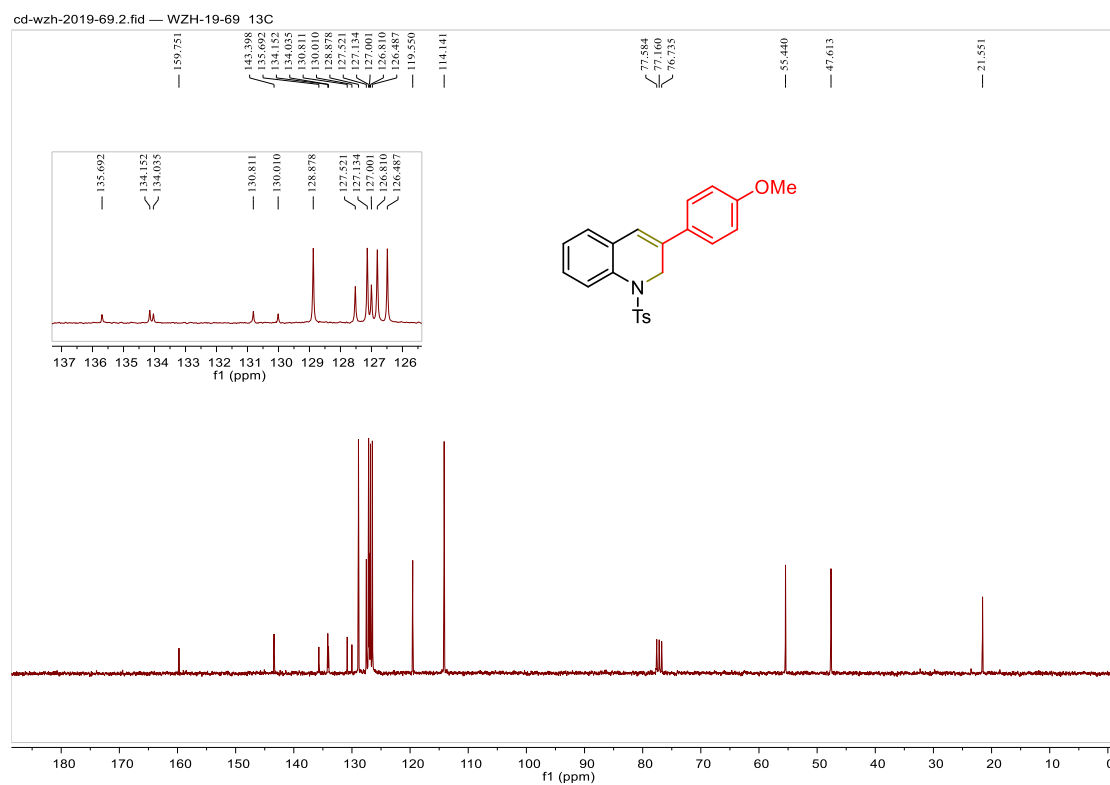

<sup>1</sup>H NMR (300 MHz, CDCl<sub>3</sub>) of **3n**

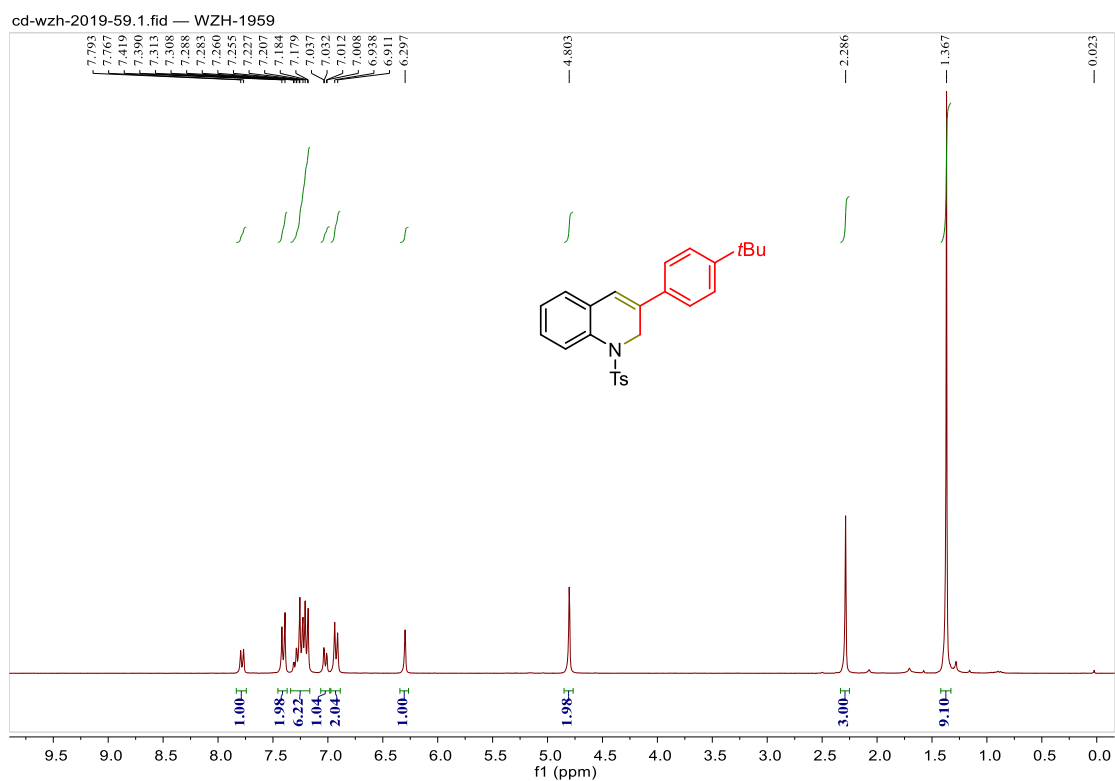

<sup>13</sup>C NMR (75 MHz, CDCl<sub>3</sub>) of **3n**

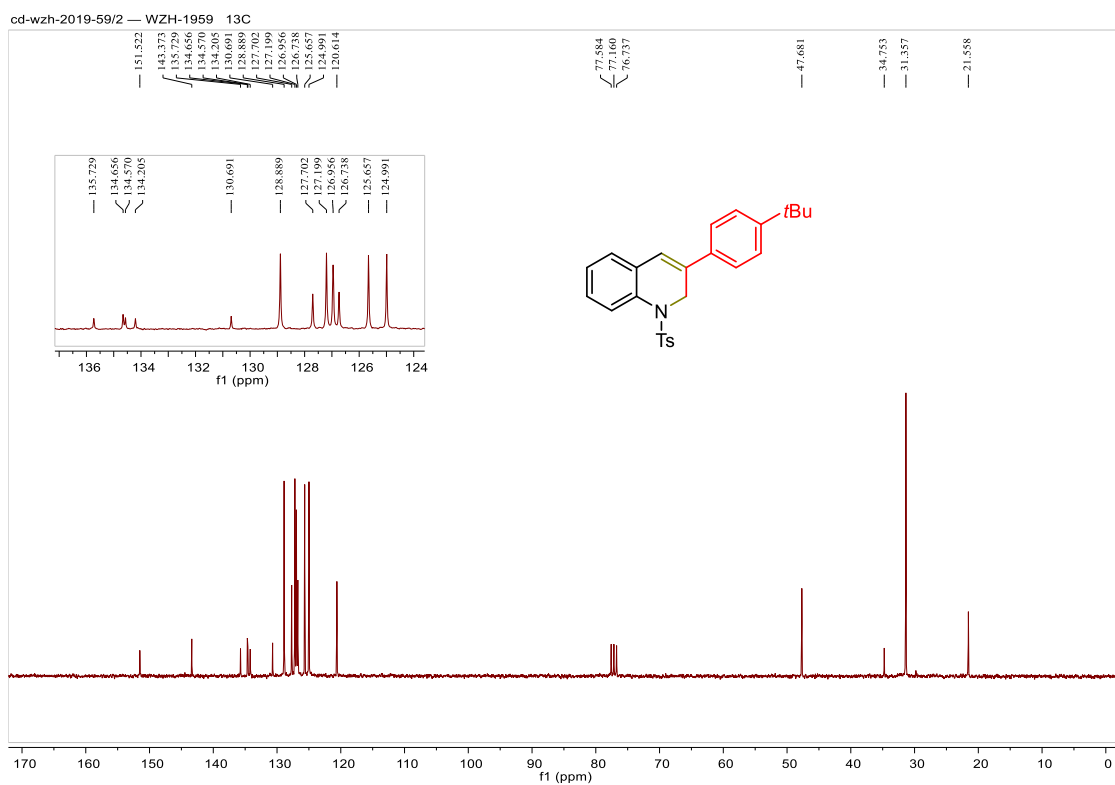

### <sup>1</sup>H NMR (300 MHz, CDCl<sub>3</sub>) of **3o**

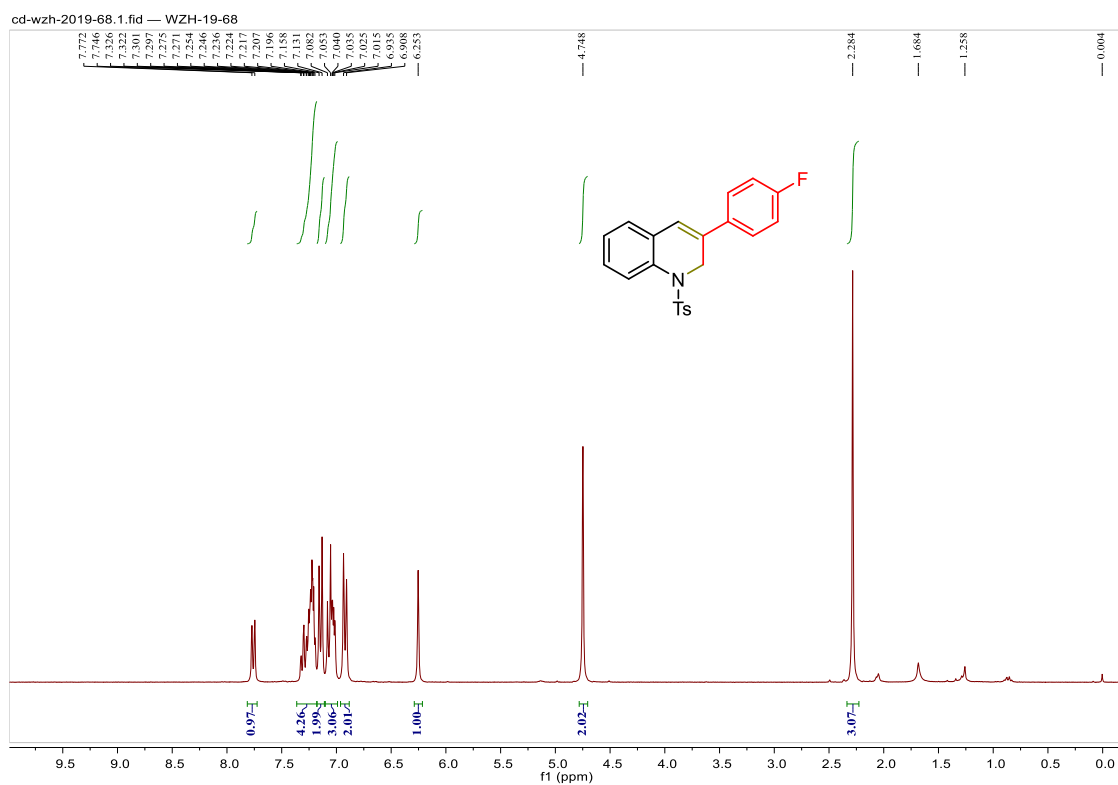

### <sup>13</sup>C NMR (75 MHz, CDCl<sub>3</sub>) of **3o**

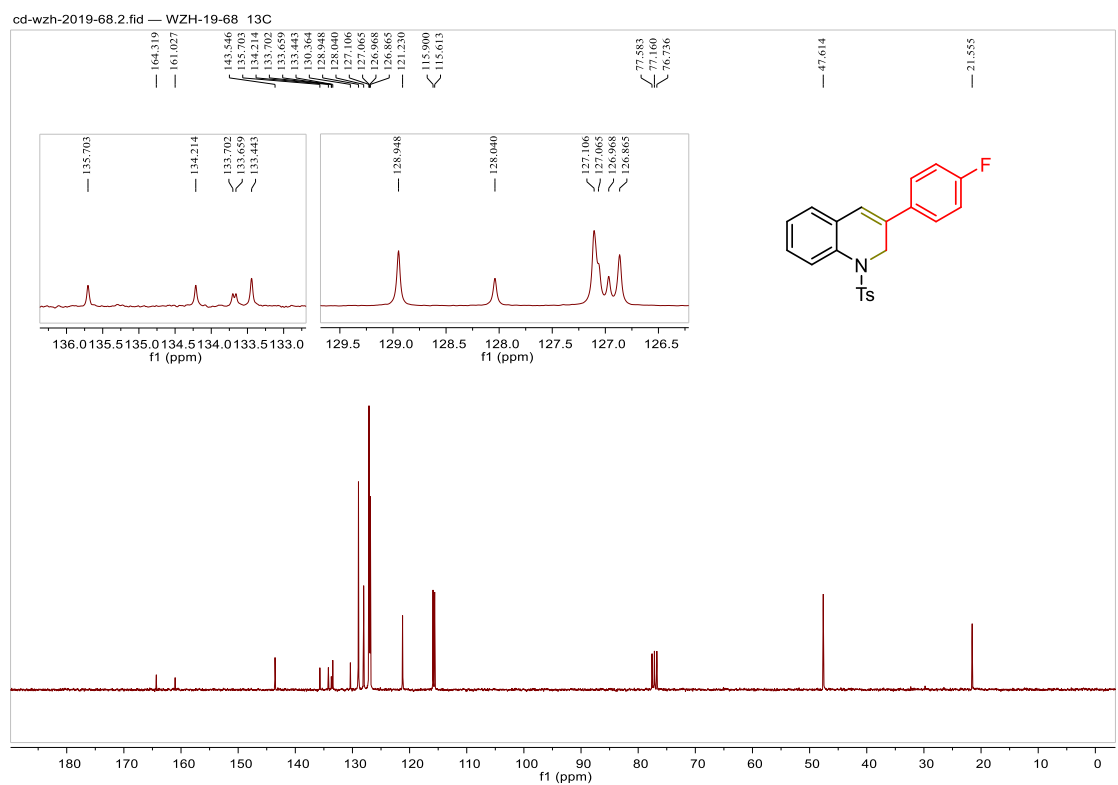

<sup>1</sup>H NMR (300 MHz, CDCl<sub>3</sub>) of **3p**

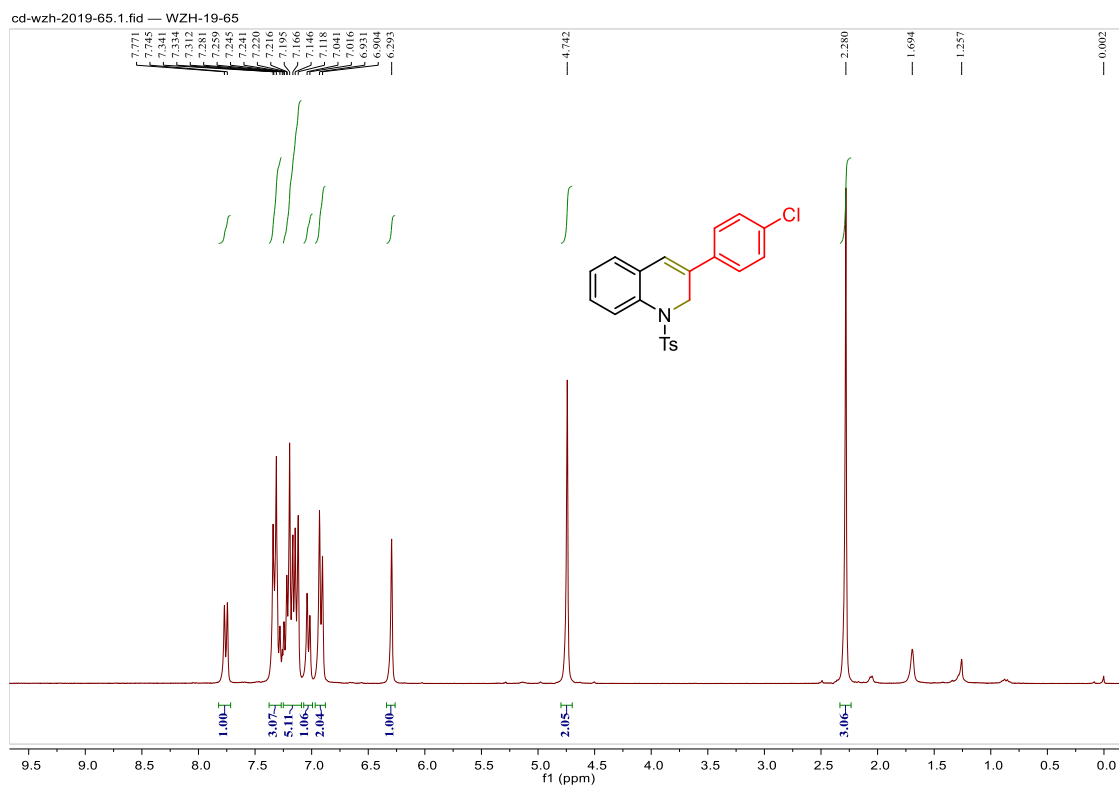

<sup>13</sup>C NMR (75 MHz, CDCl<sub>3</sub>) of **3p**

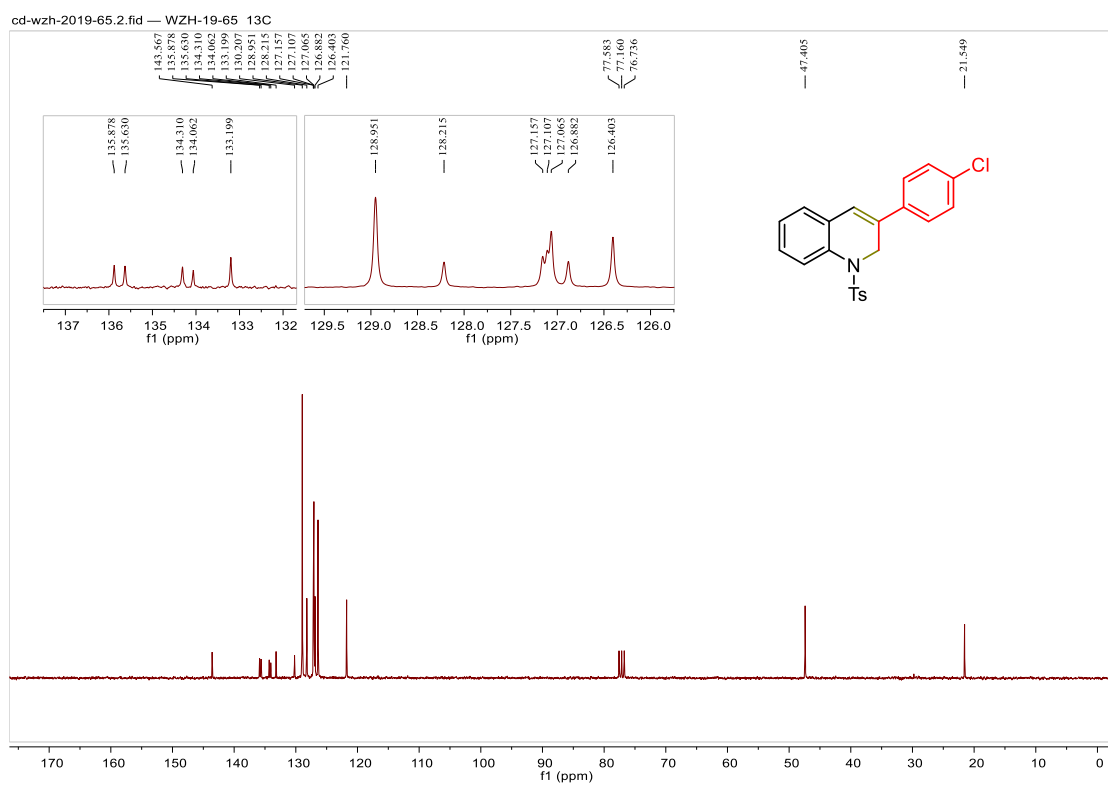

<sup>1</sup>H NMR (400 MHz, CDCl<sub>3</sub>) of **3q**

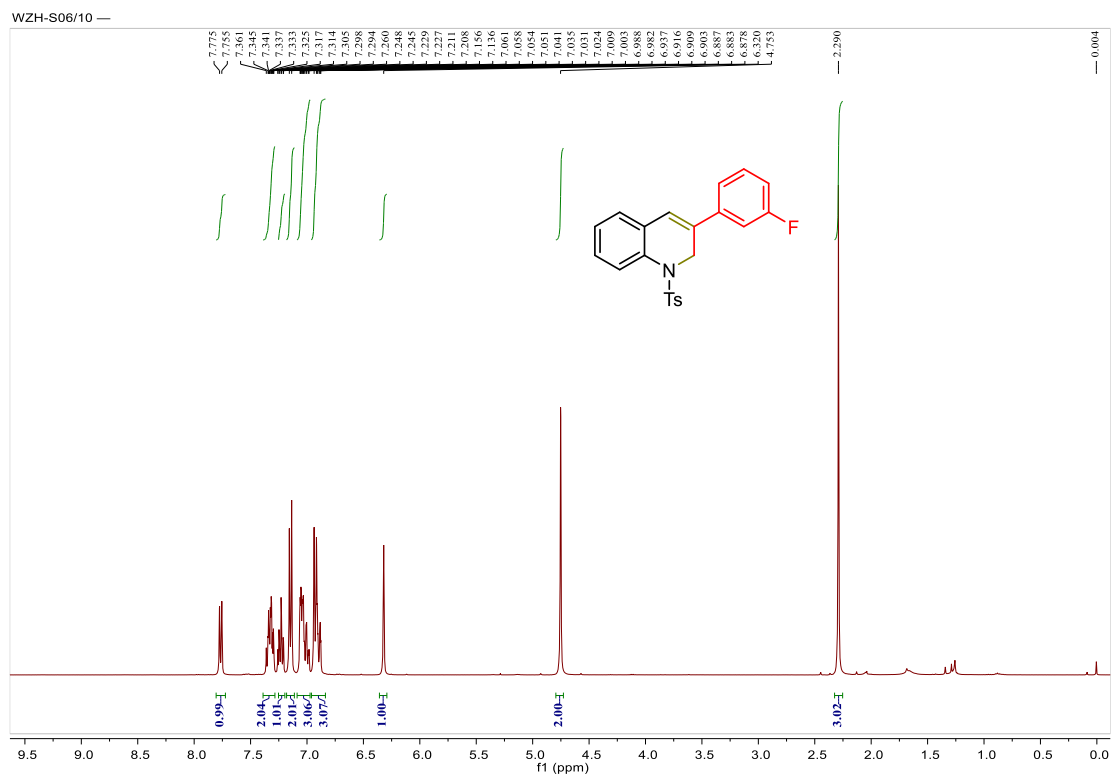

<sup>13</sup>C NMR (101 MHz, CDCl<sub>3</sub>) of **3q**

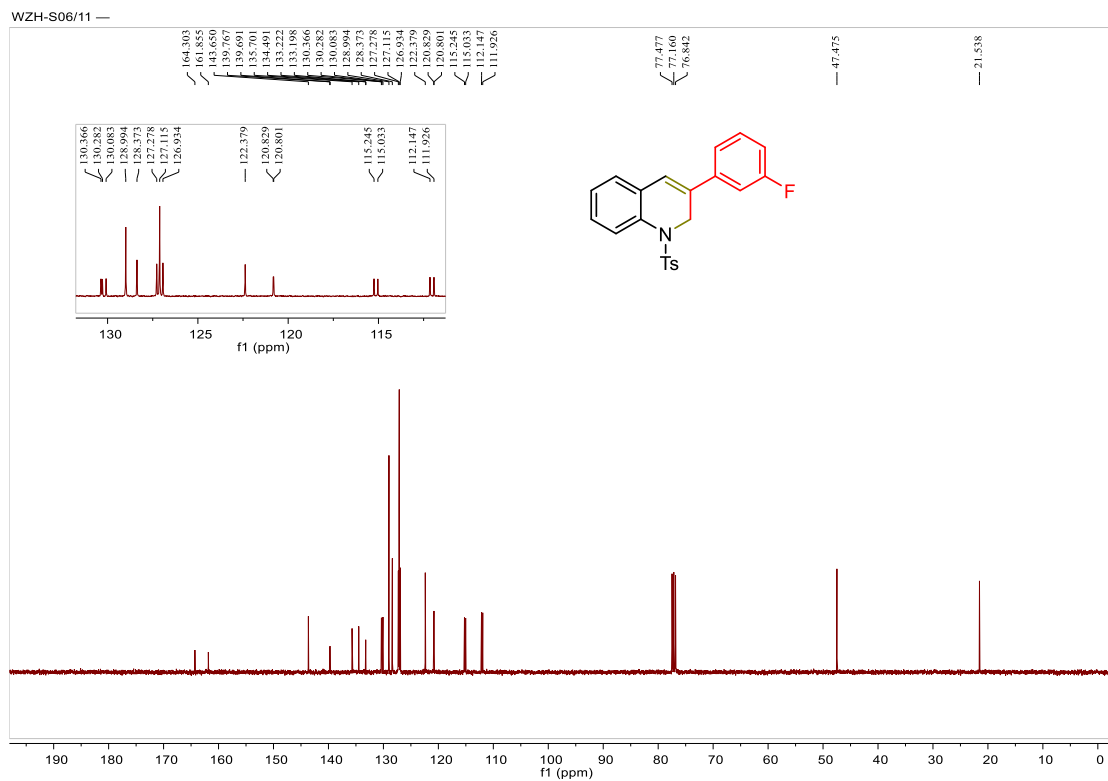



### <sup>1</sup>H NMR (300 MHz, CDCl<sub>3</sub>) of **3r**

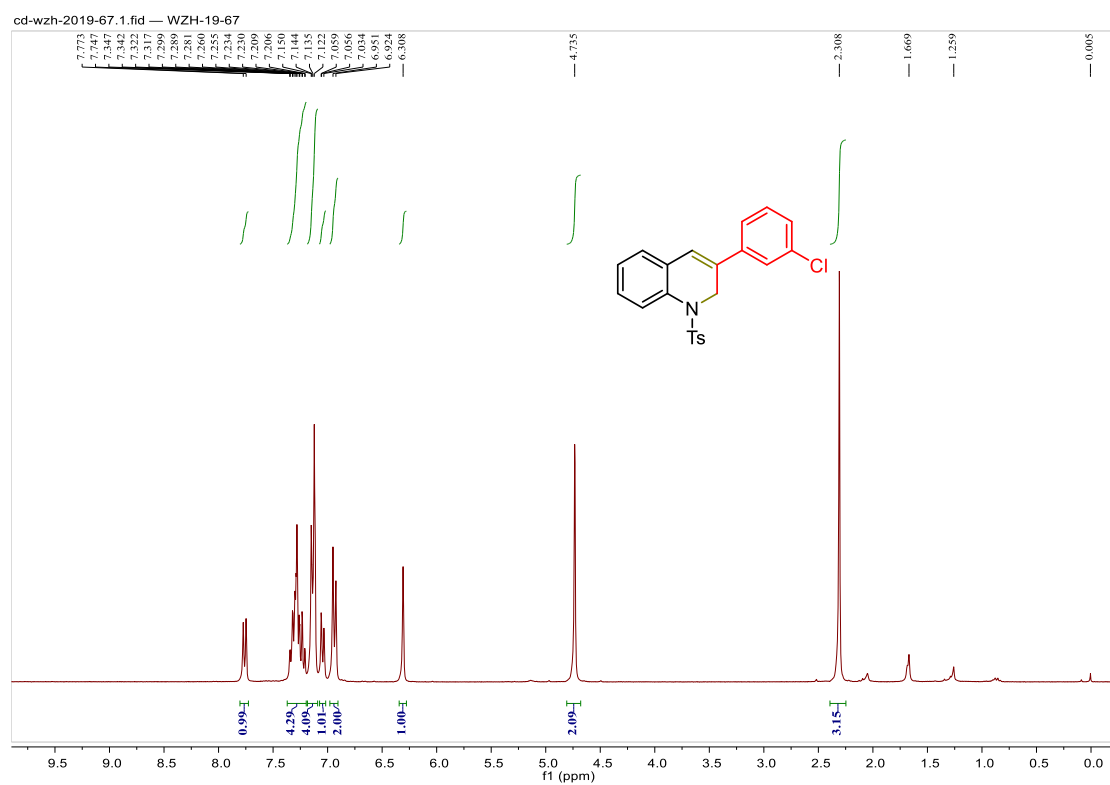

### <sup>13</sup>C NMR (75 MHz, CDCl<sub>3</sub>) of **3r**

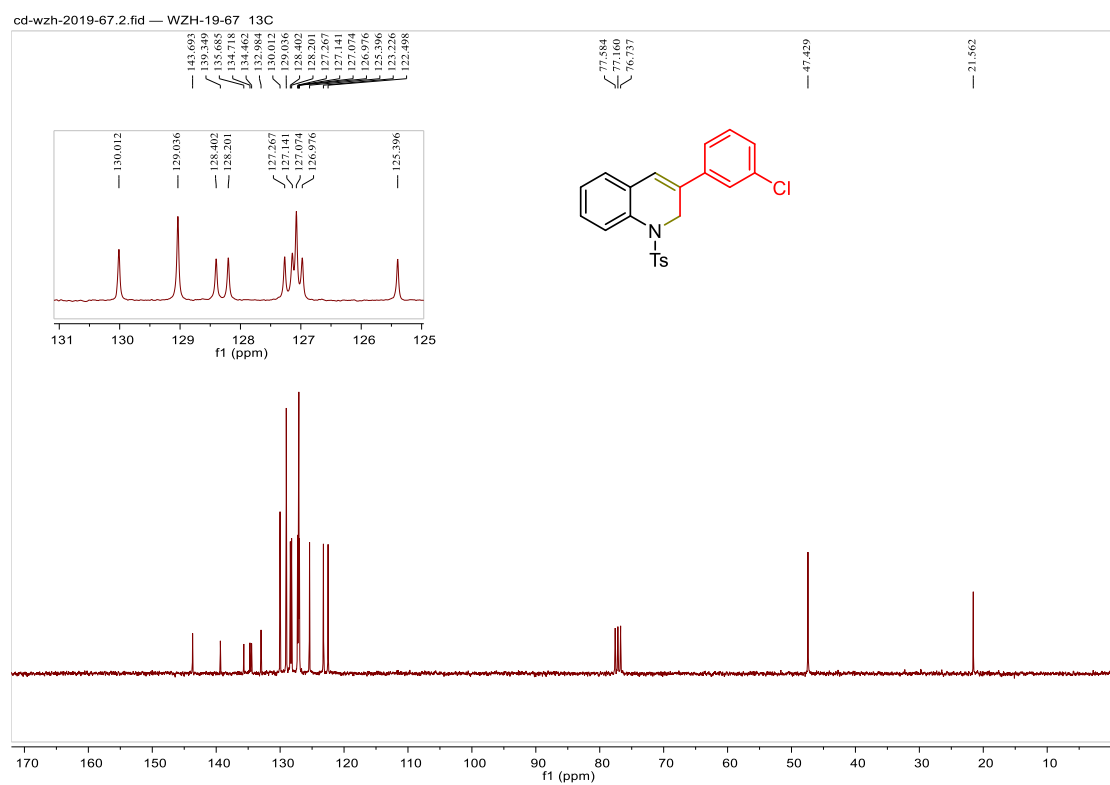

<sup>1</sup>H NMR (300 MHz, CDCl<sub>3</sub>) of **3s**

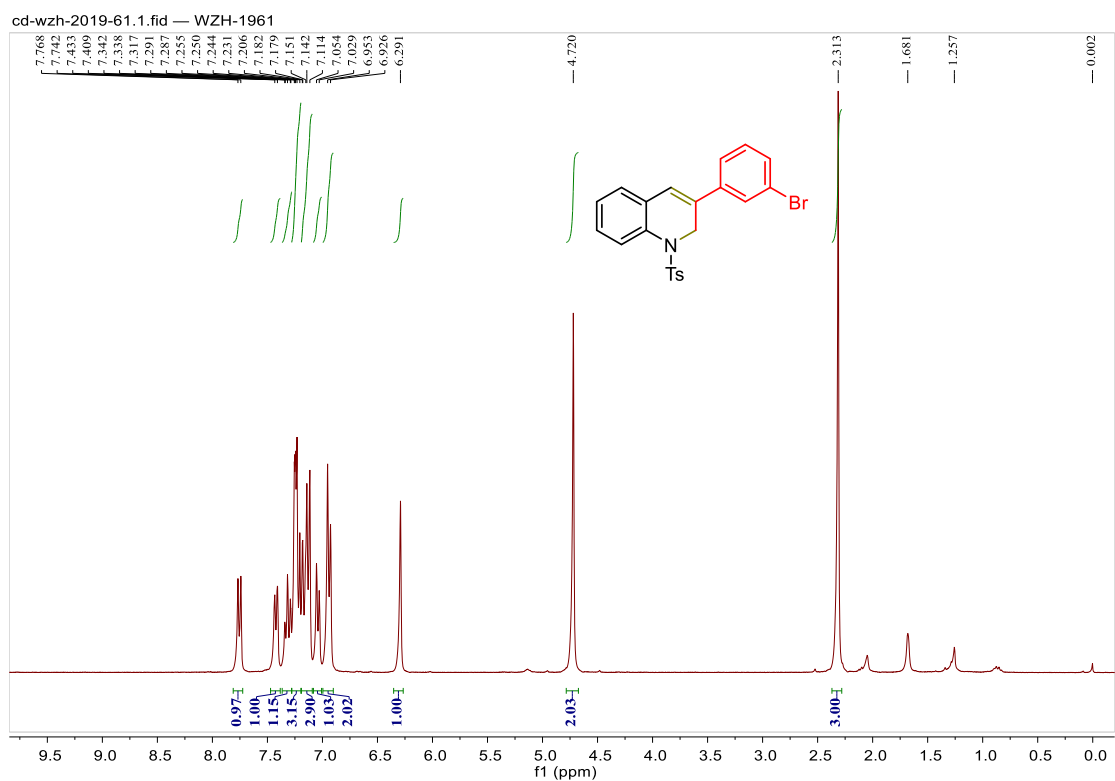

<sup>13</sup>C NMR (75 MHz, CDCl<sub>3</sub>) of **3s**

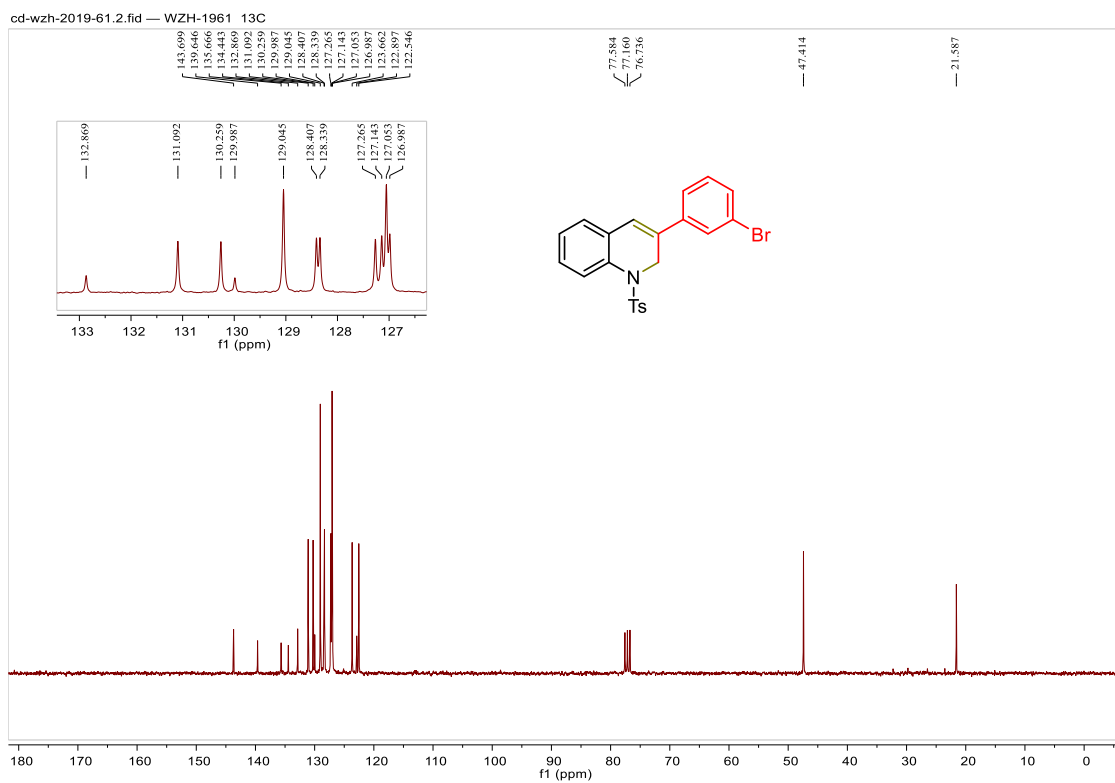

### <sup>1</sup>H NMR (300 MHz, CDCl<sub>3</sub>) of 3t

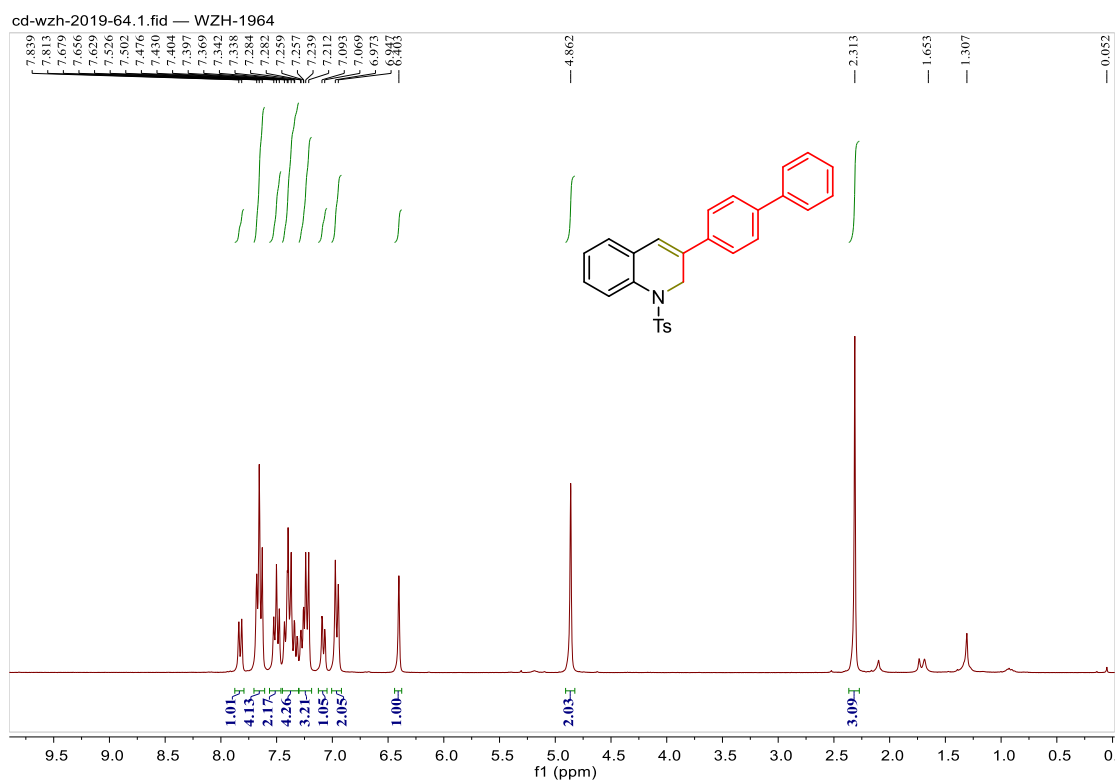

### <sup>13</sup>C NMR (75 MHz, CDCl<sub>3</sub>) of 3t

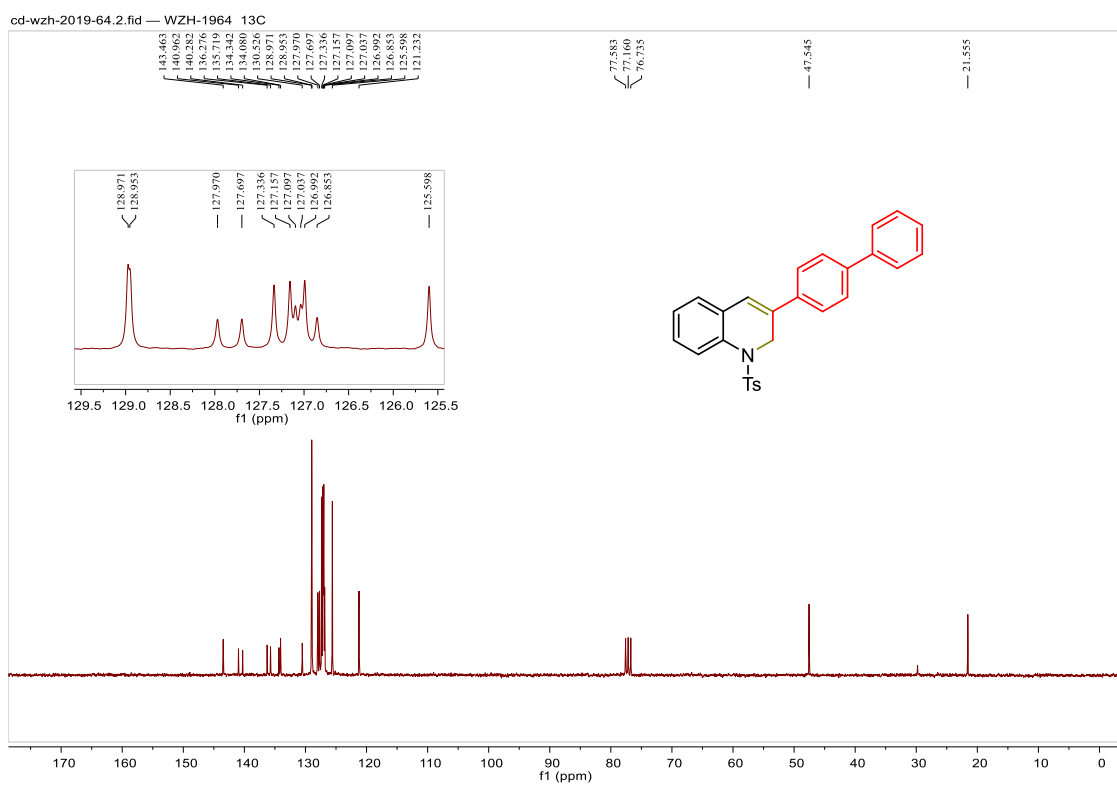

<sup>1</sup>H NMR (300 MHz, CDCl<sub>3</sub>) of **3u**

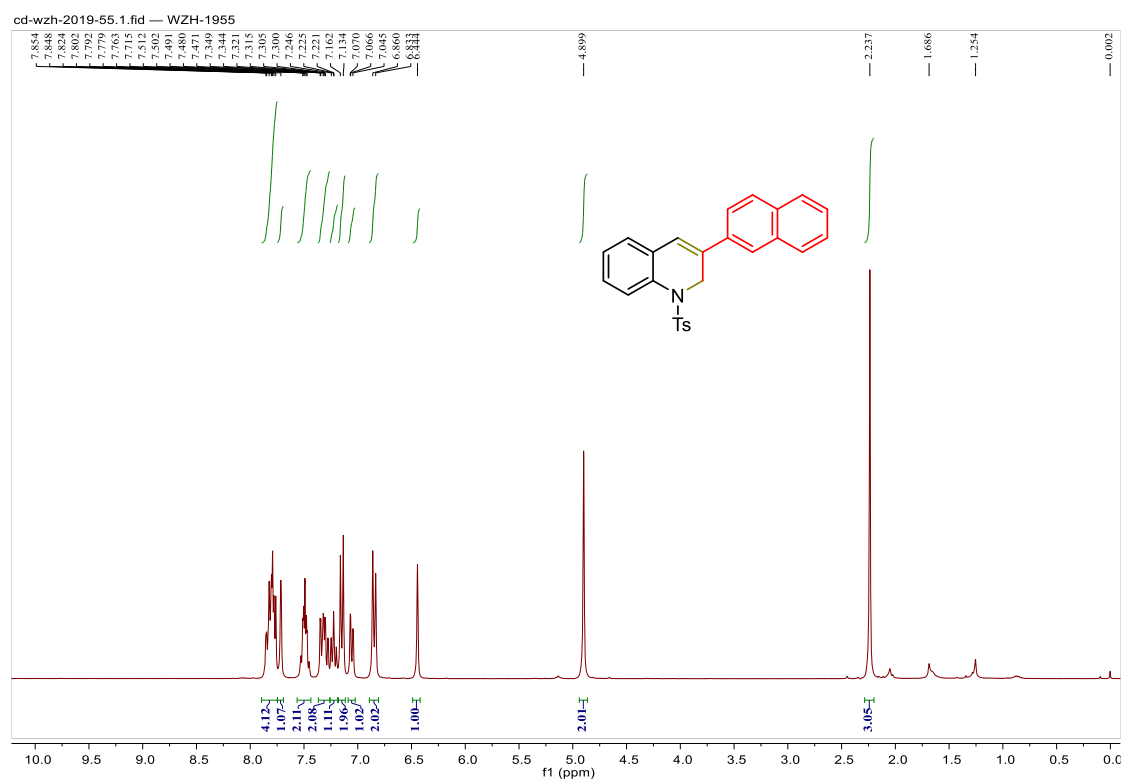

<sup>13</sup>C NMR (75 MHz, CDCl<sub>3</sub>) of **3u**

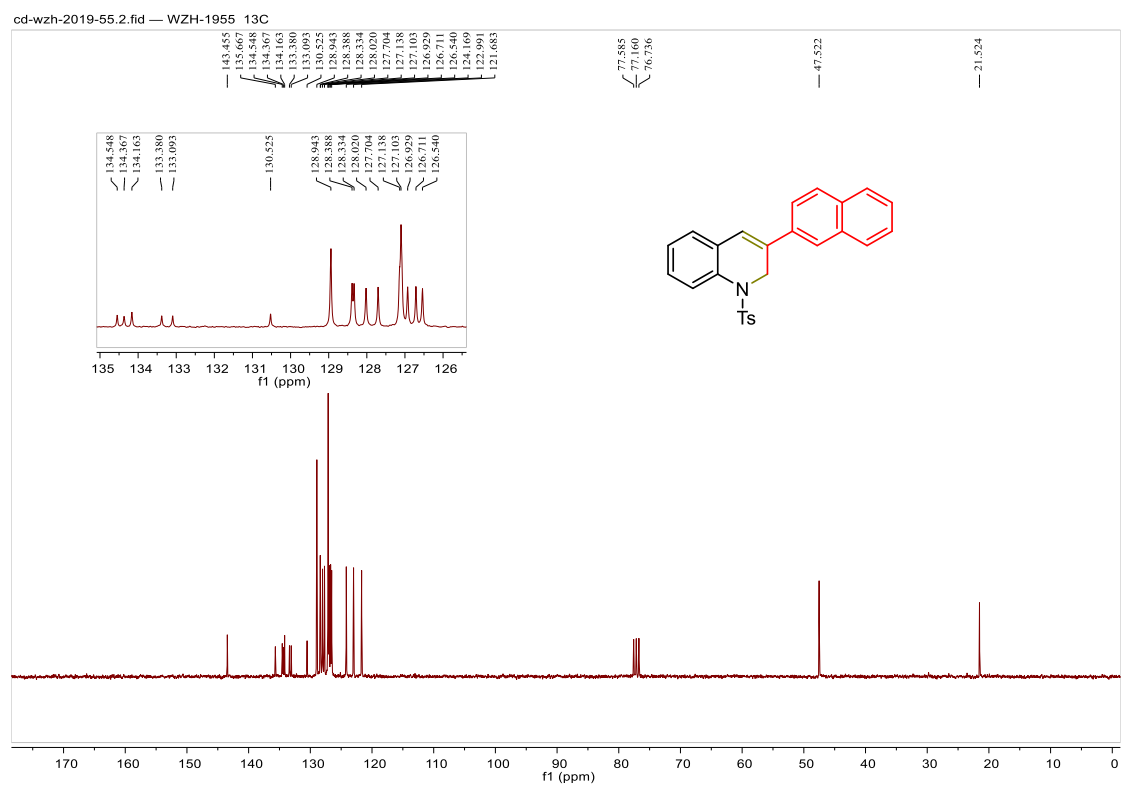

<sup>1</sup>H NMR (400 MHz, CDCl<sub>3</sub>) of **6a**

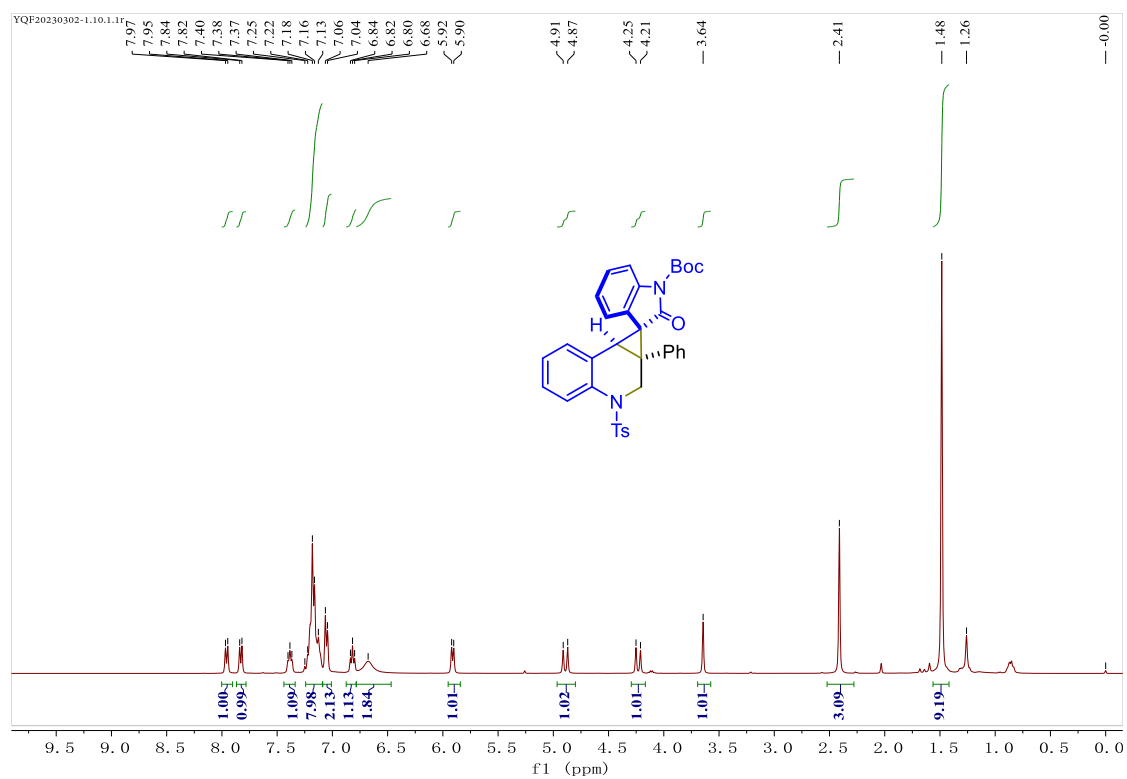

<sup>13</sup>C NMR (101 MHz, CDCl<sub>3</sub>) of **6a**

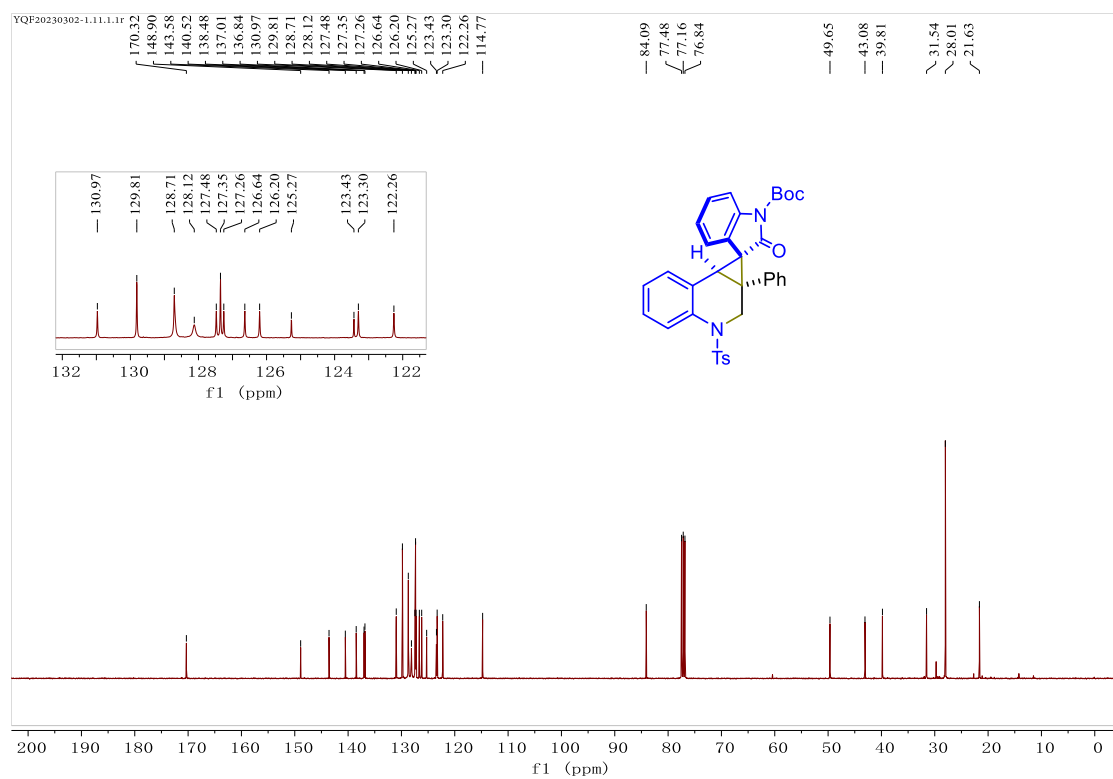

<sup>1</sup>H NMR (400 MHz, CDCl<sub>3</sub>) of **6b**

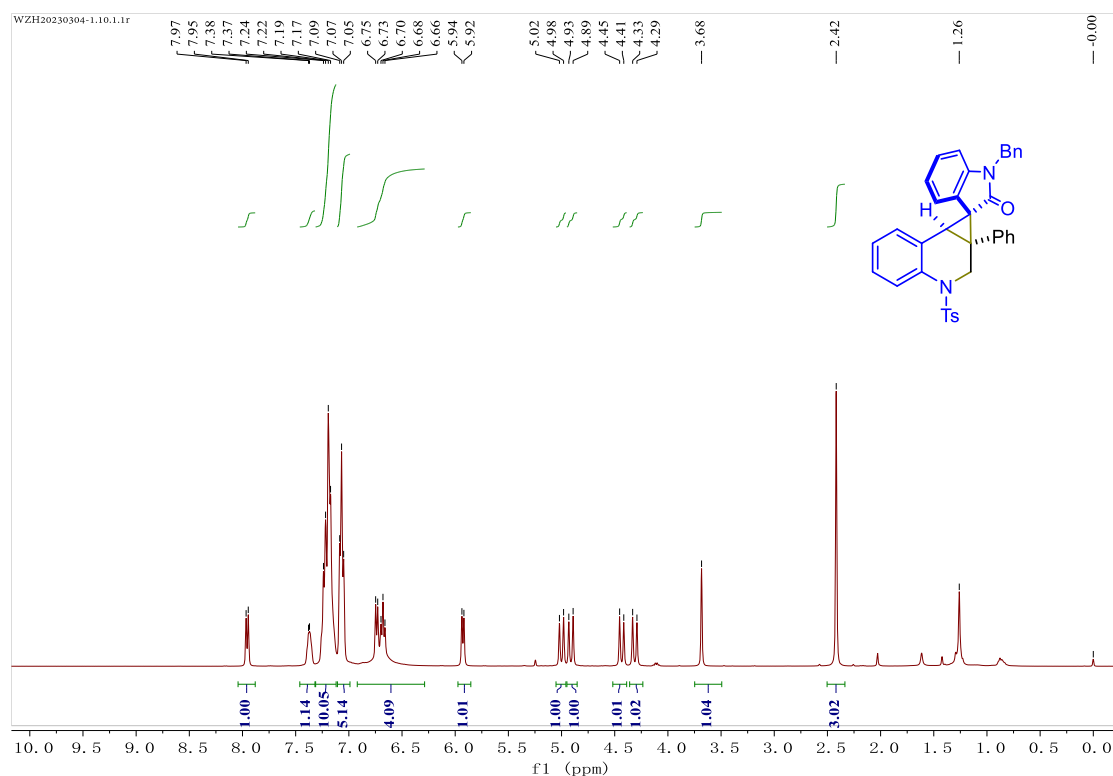

<sup>13</sup>C NMR (101 MHz, CDCl<sub>3</sub>) of **6b**

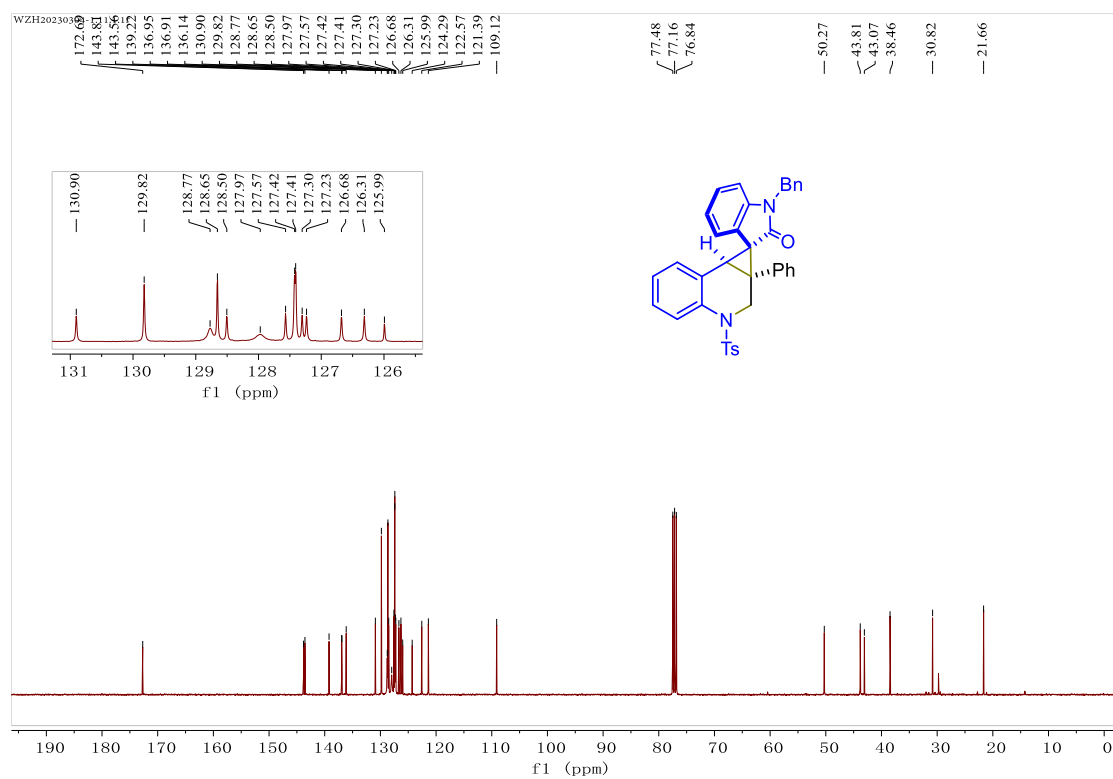

<sup>1</sup>H NMR (400 MHz, CDCl<sub>3</sub>) of **6c**

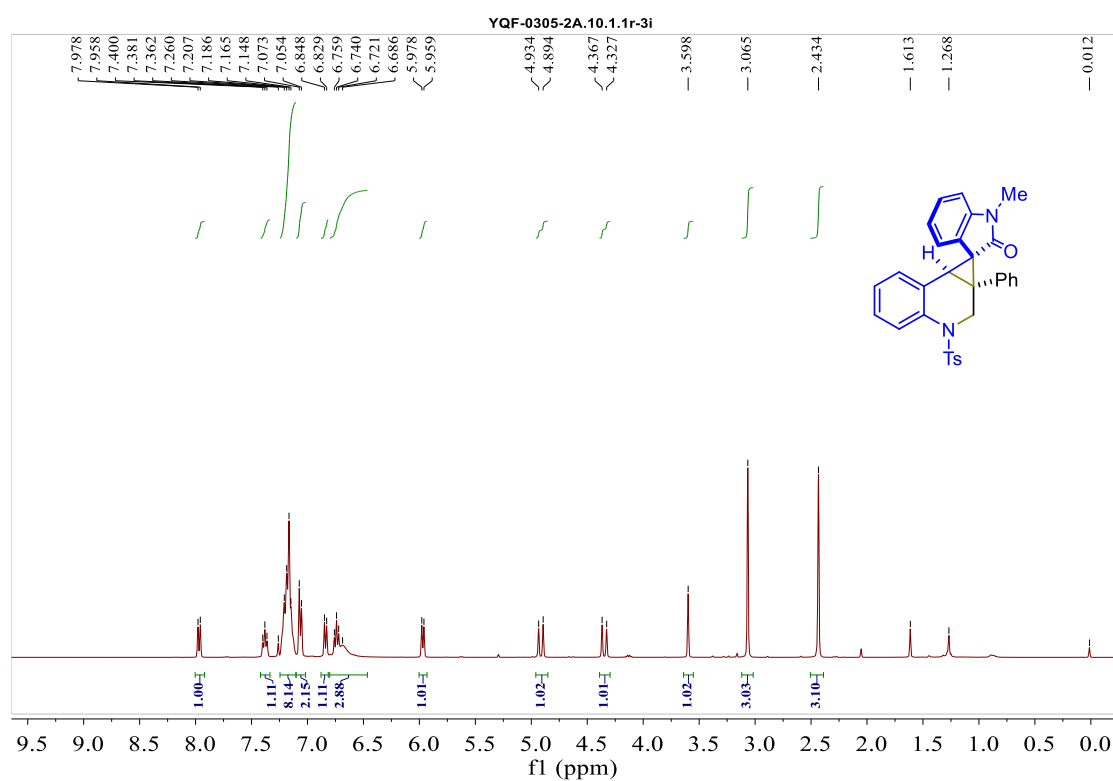

<sup>13</sup>C NMR (101 MHz, CDCl<sub>3</sub>) of **6c**

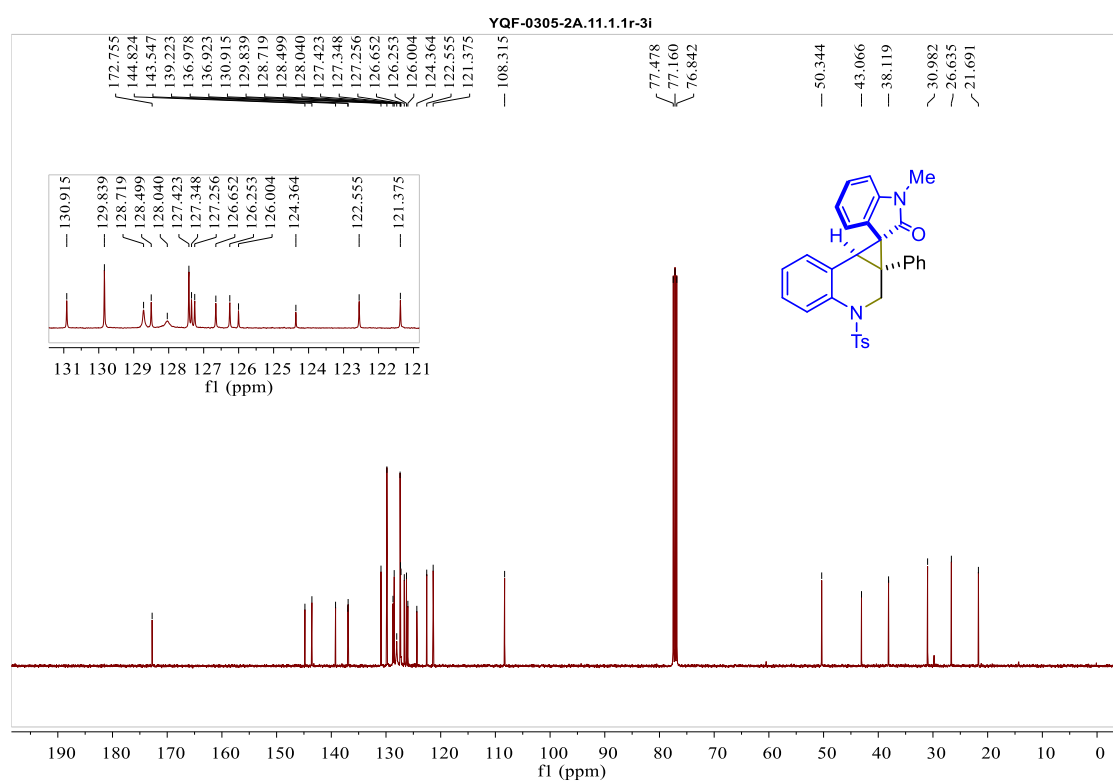

<sup>1</sup>H NMR (400 MHz, CDCl<sub>3</sub>) of **6d**

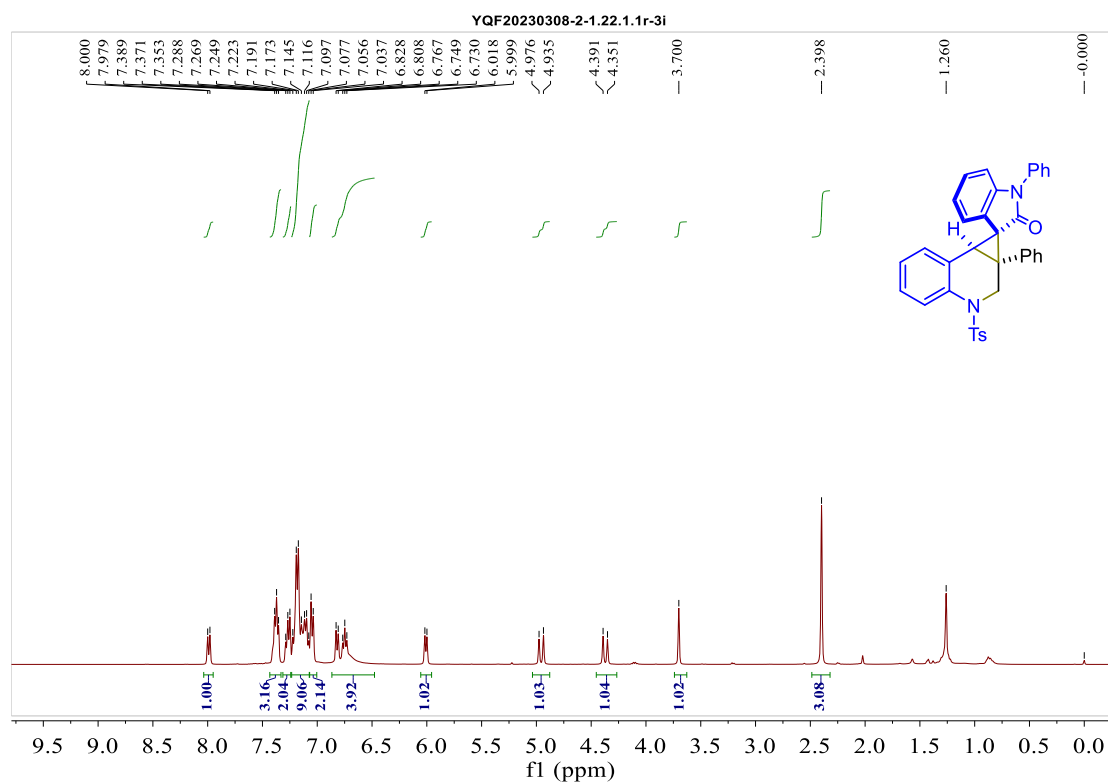

<sup>13</sup>C NMR (101 MHz, CDCl<sub>3</sub>) of **6d**

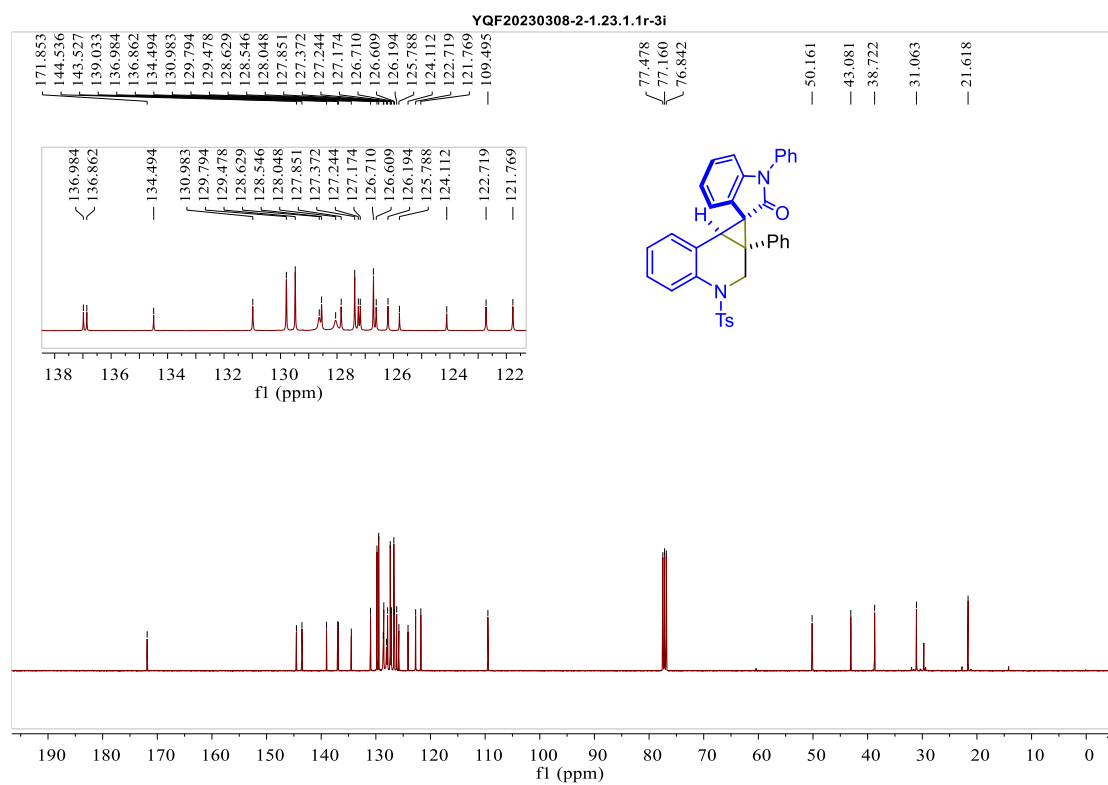



<sup>1</sup>H NMR (400 MHz, CDCl<sub>3</sub>) of **6e**

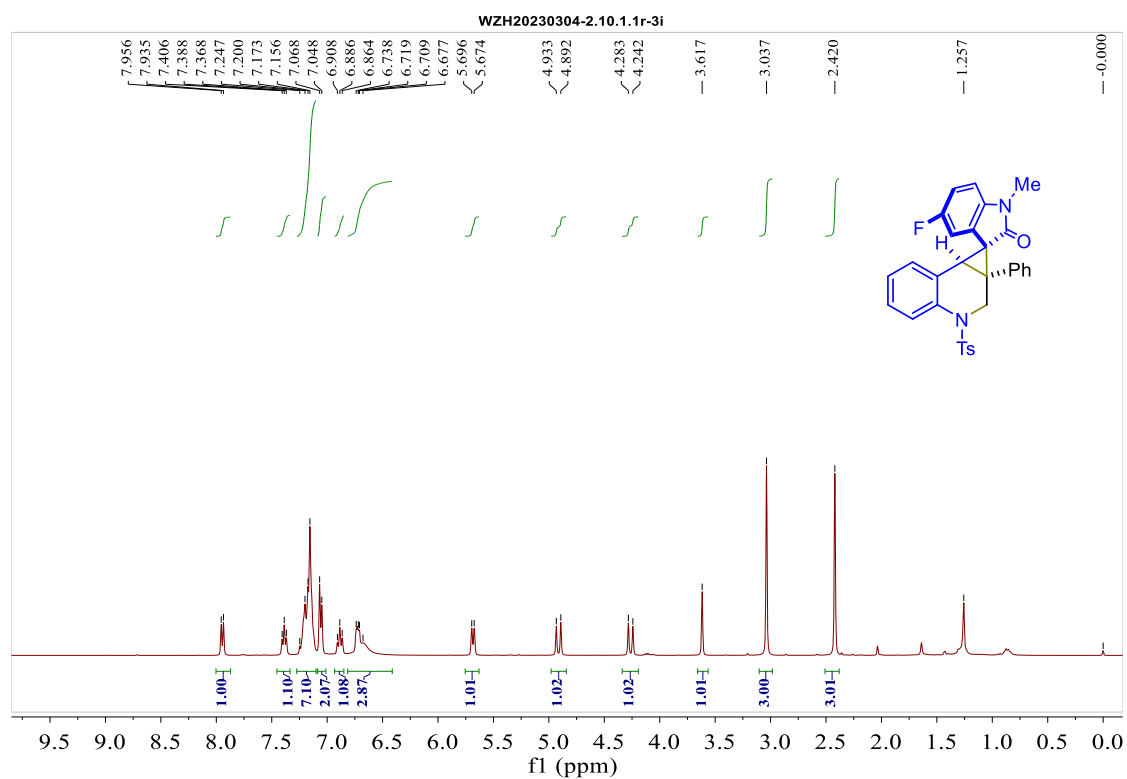

<sup>13</sup>C NMR (101 MHz, CDCl<sub>3</sub>) of **6e**

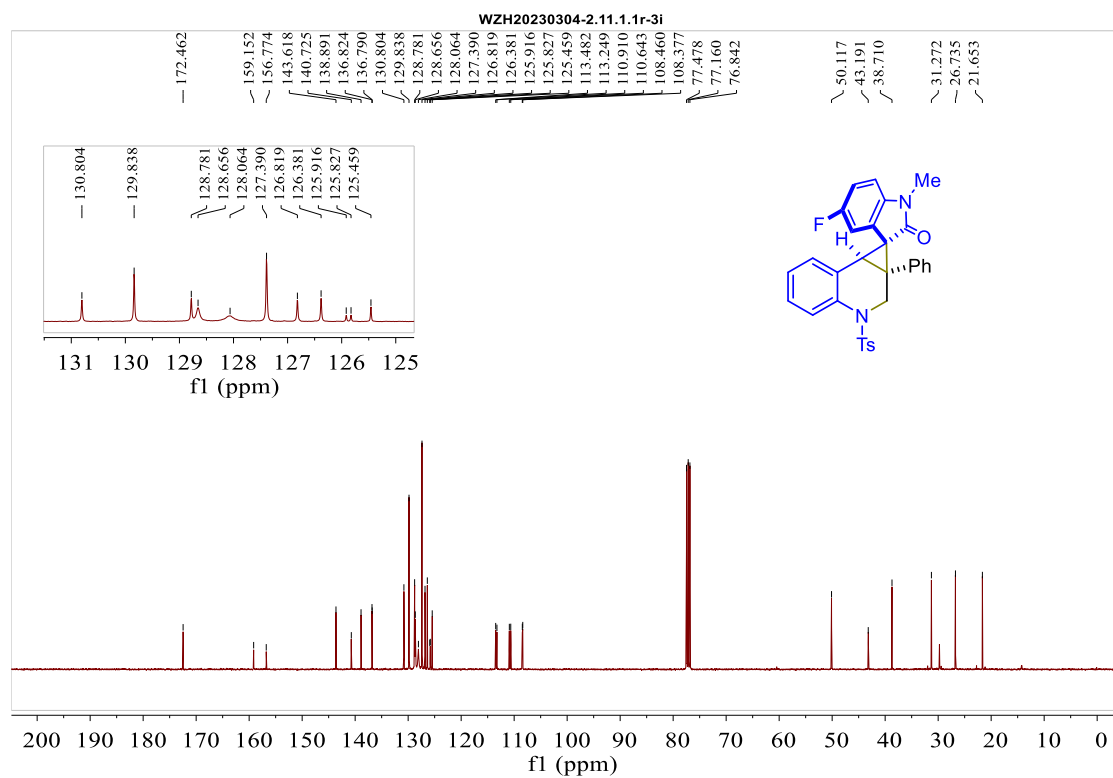

<sup>1</sup>H NMR (400 MHz, CDCl<sub>3</sub>) of **6f**

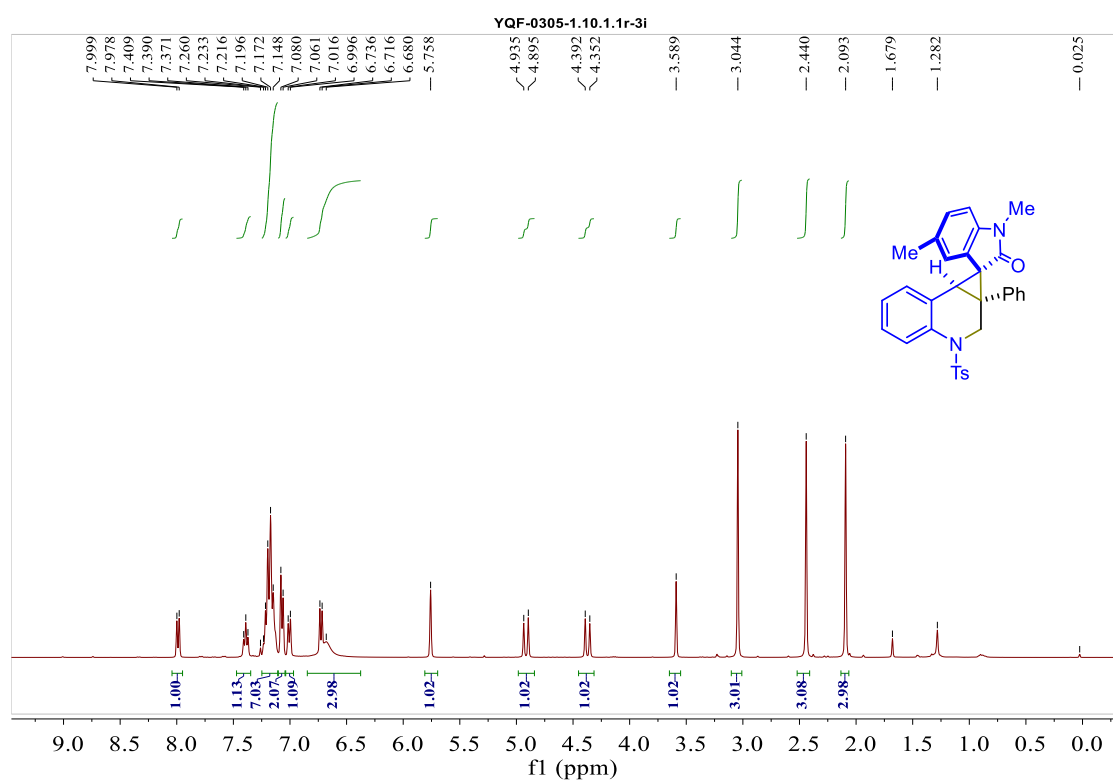

<sup>13</sup>C NMR (101 MHz, CDCl<sub>3</sub>) of **6f**

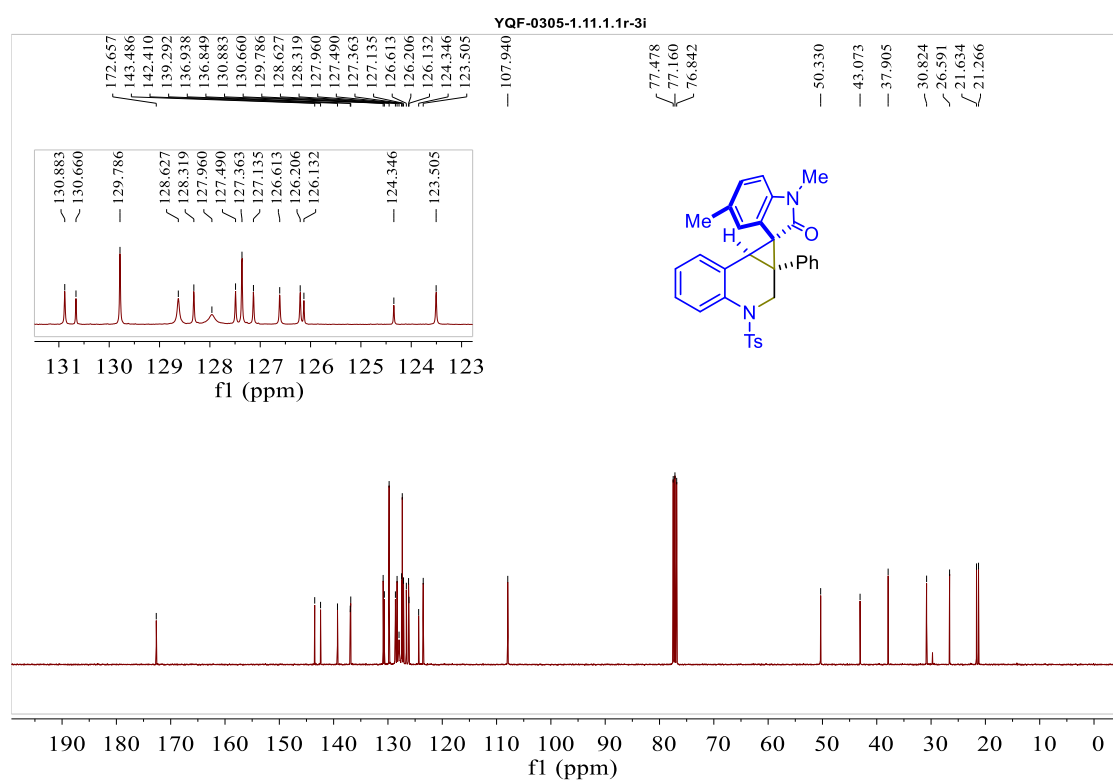

<sup>1</sup>H NMR (400 MHz, CDCl<sub>3</sub>) of **6g**

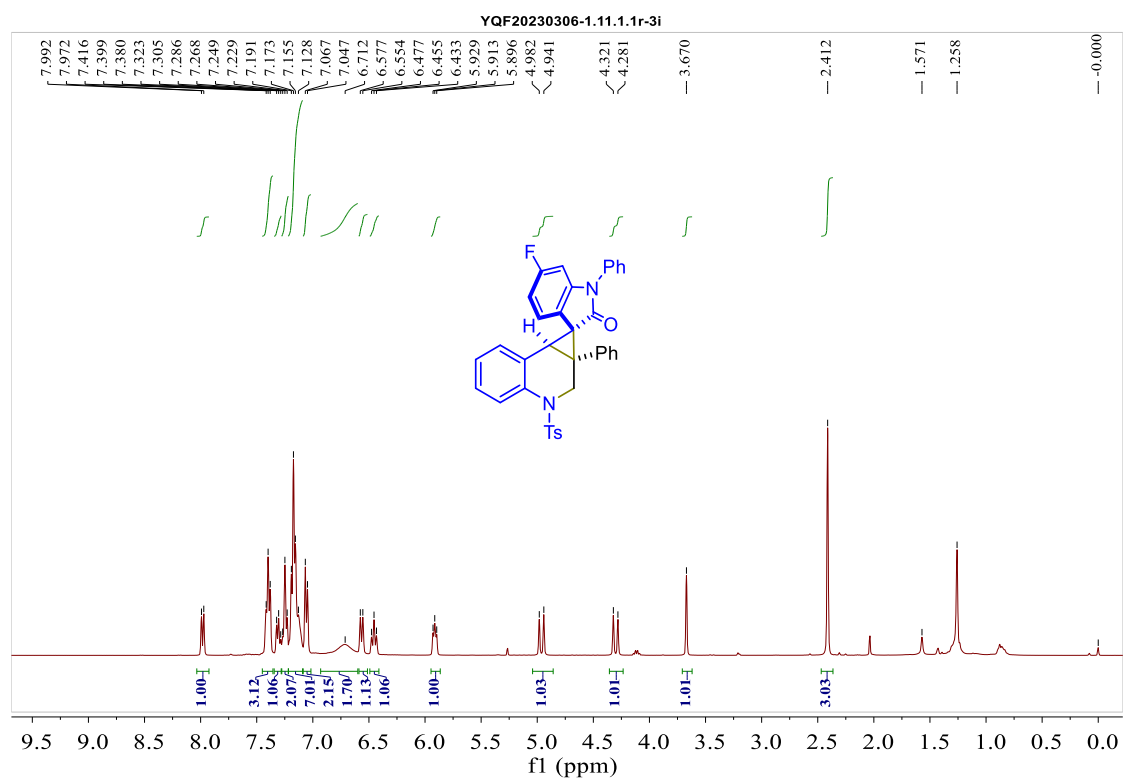

<sup>13</sup>C NMR (101 MHz, CDCl<sub>3</sub>) of **6g**

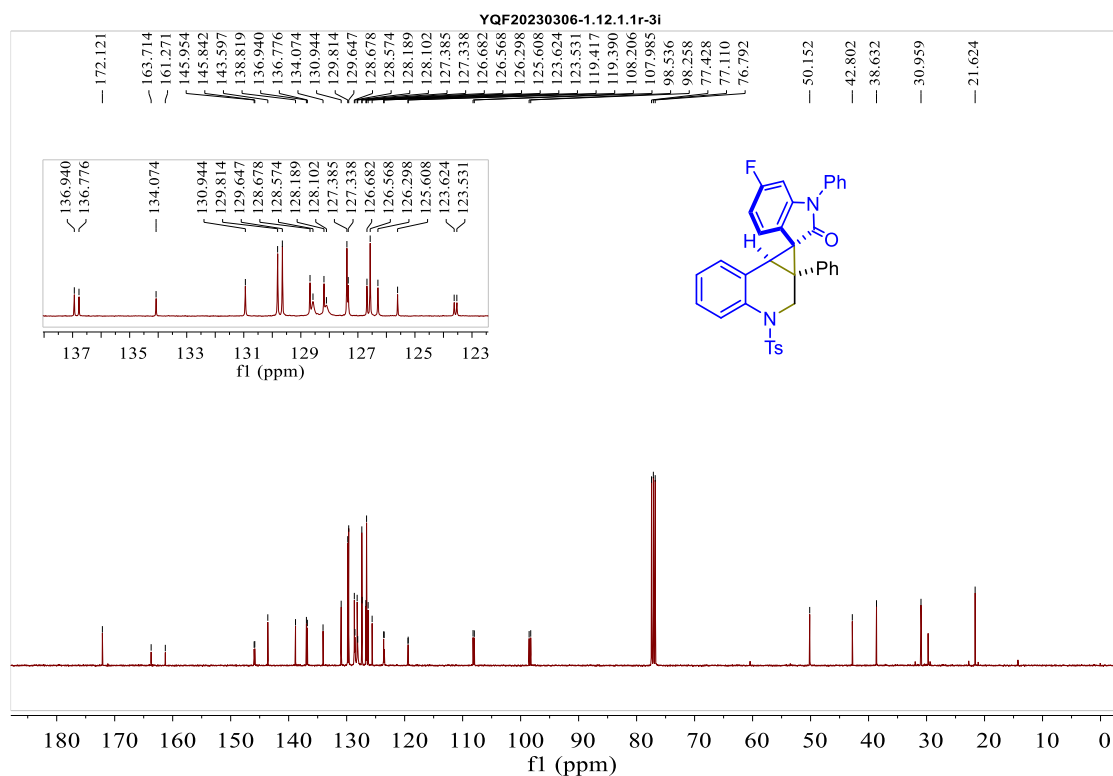



<sup>1</sup>H NMR (400 MHz, CDCl<sub>3</sub>) of **6i**

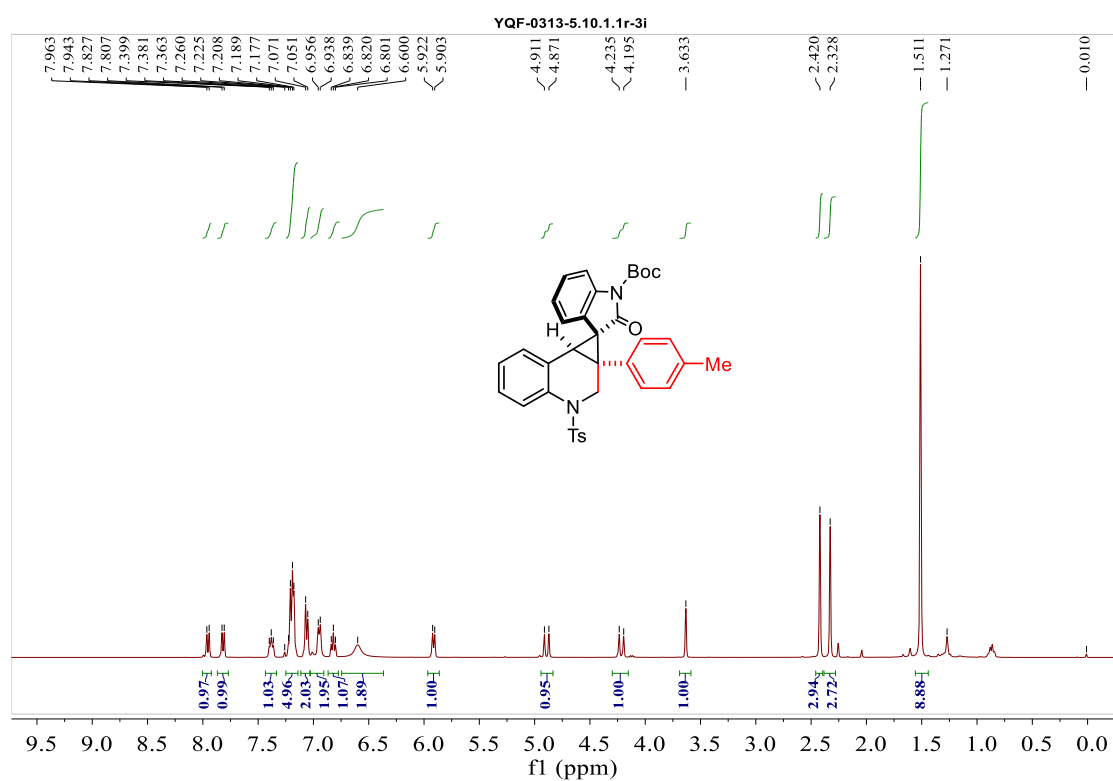

<sup>13</sup>C NMR (101 MHz, CDCl<sub>3</sub>) of **6i**

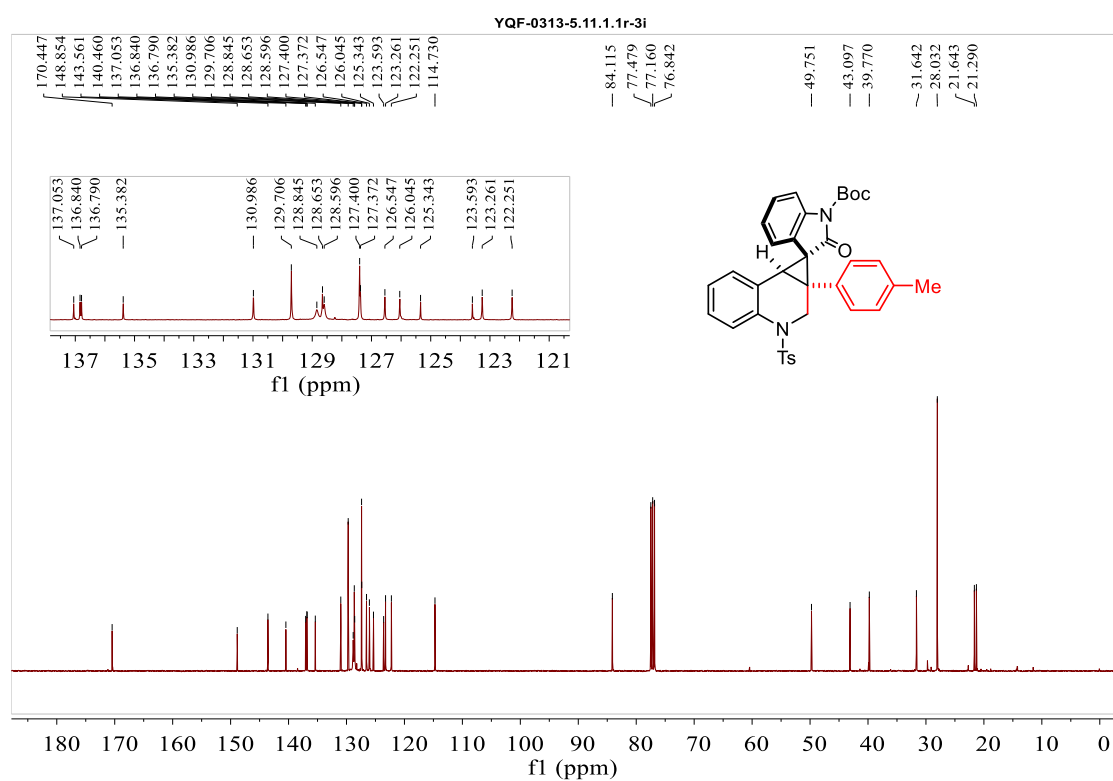

<sup>1</sup>H NMR (400 MHz, CDCl<sub>3</sub>) of **6j**

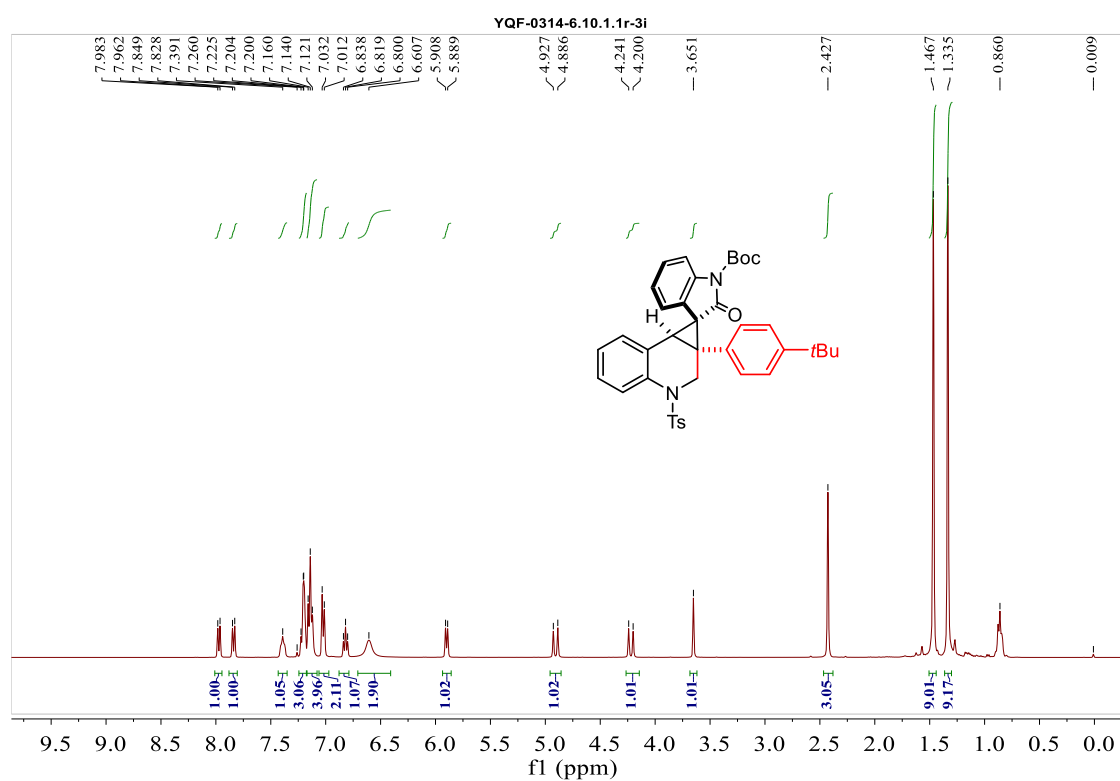

<sup>13</sup>C NMR (101 MHz, CDCl<sub>3</sub>) of **6j**

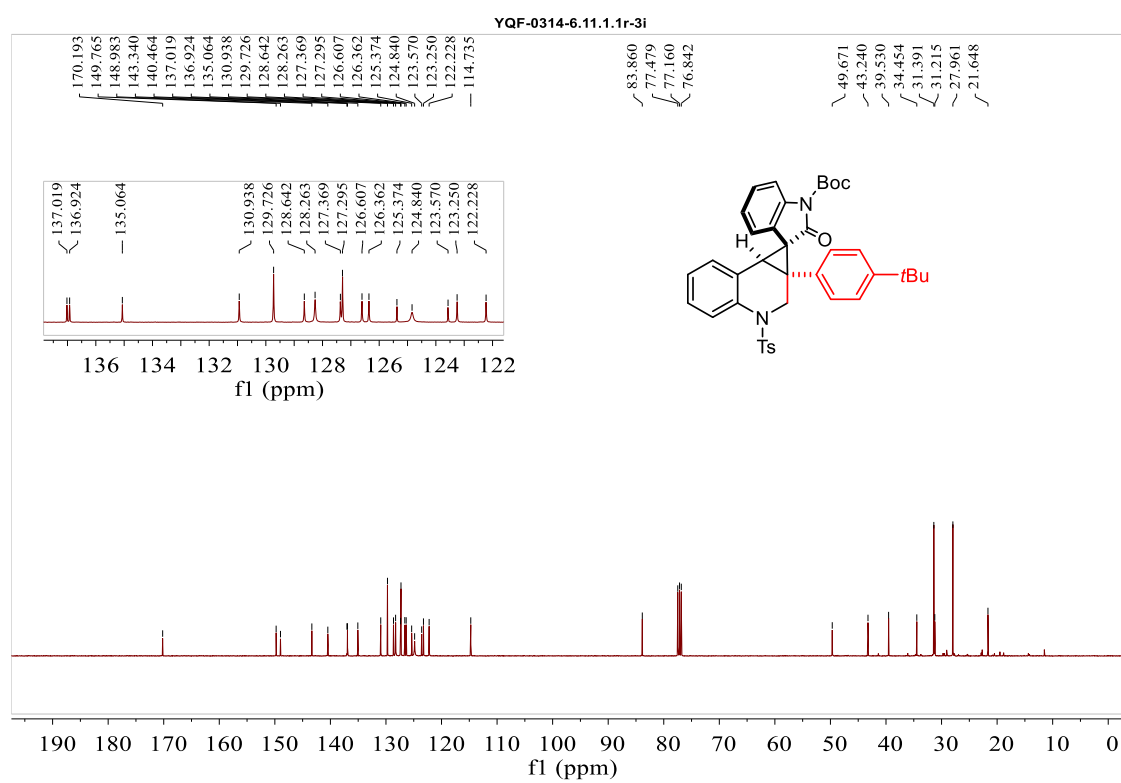

<sup>1</sup>H NMR (400 MHz, CDCl<sub>3</sub>) of **6k**

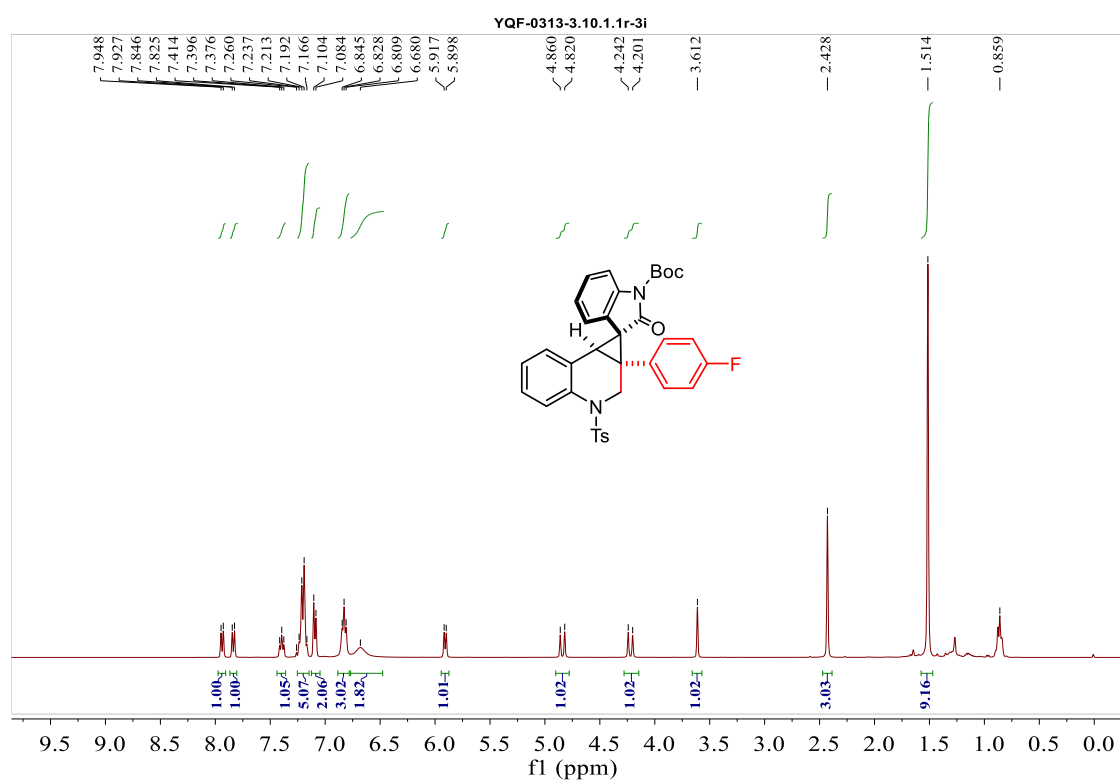

<sup>13</sup>C NMR (101 MHz, CDCl<sub>3</sub>) of **6k**

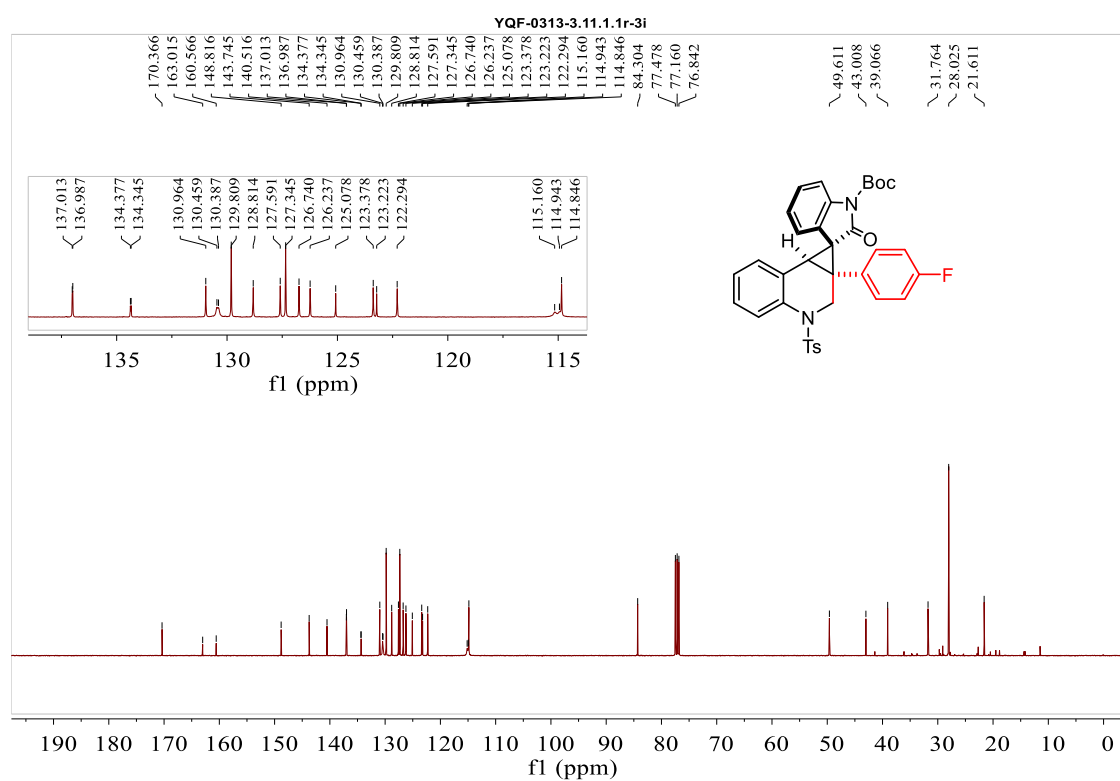

<sup>1</sup>H NMR (400 MHz, CDCl<sub>3</sub>) of **6l**

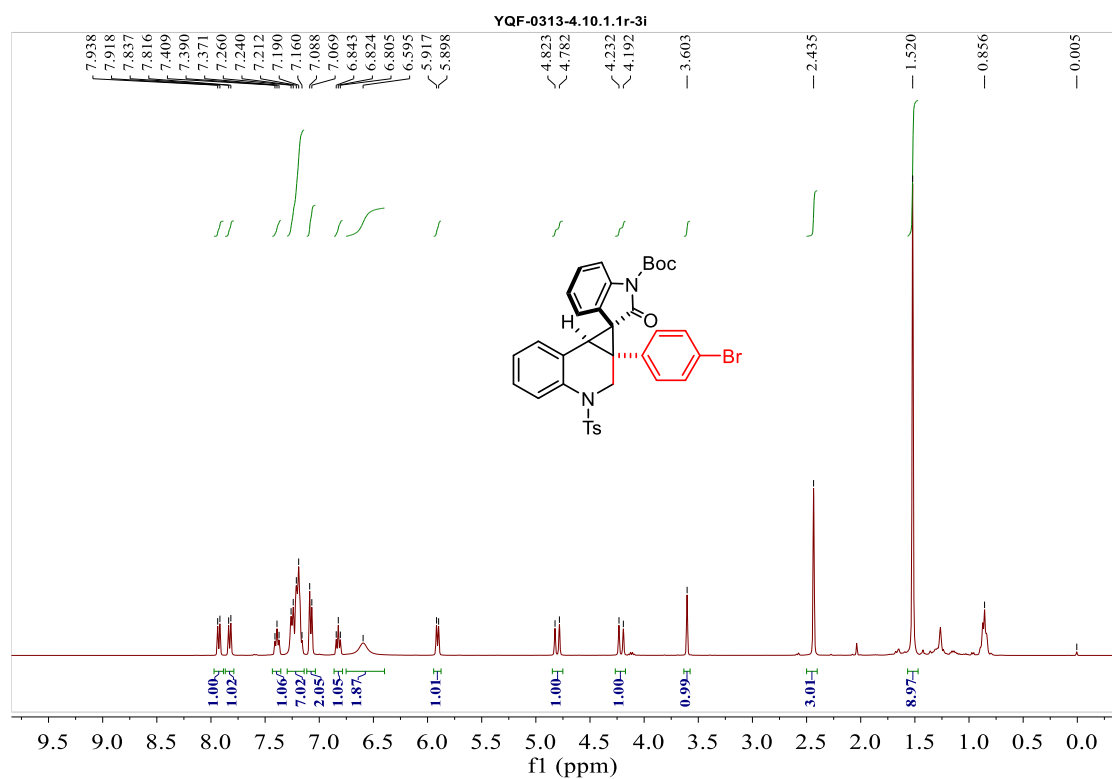

<sup>13</sup>C NMR (101 MHz, CDCl<sub>3</sub>) of **6l**

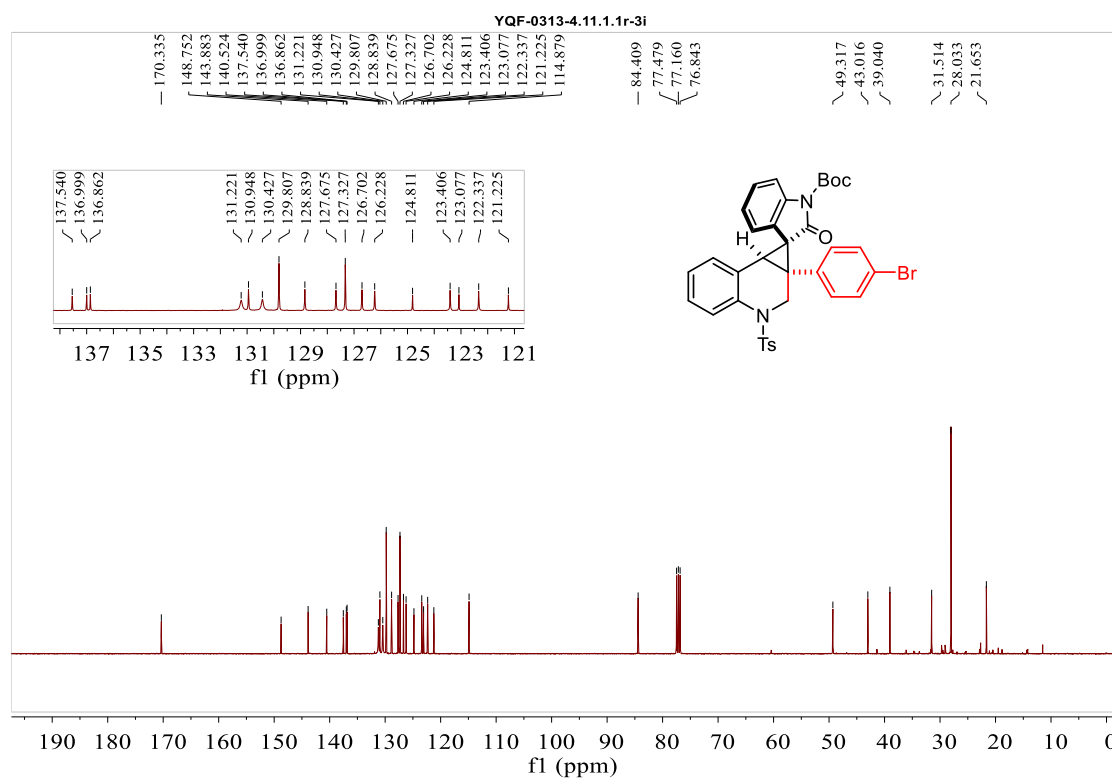



<sup>1</sup>H NMR (400 MHz, CDCl<sub>3</sub>) of **6m**

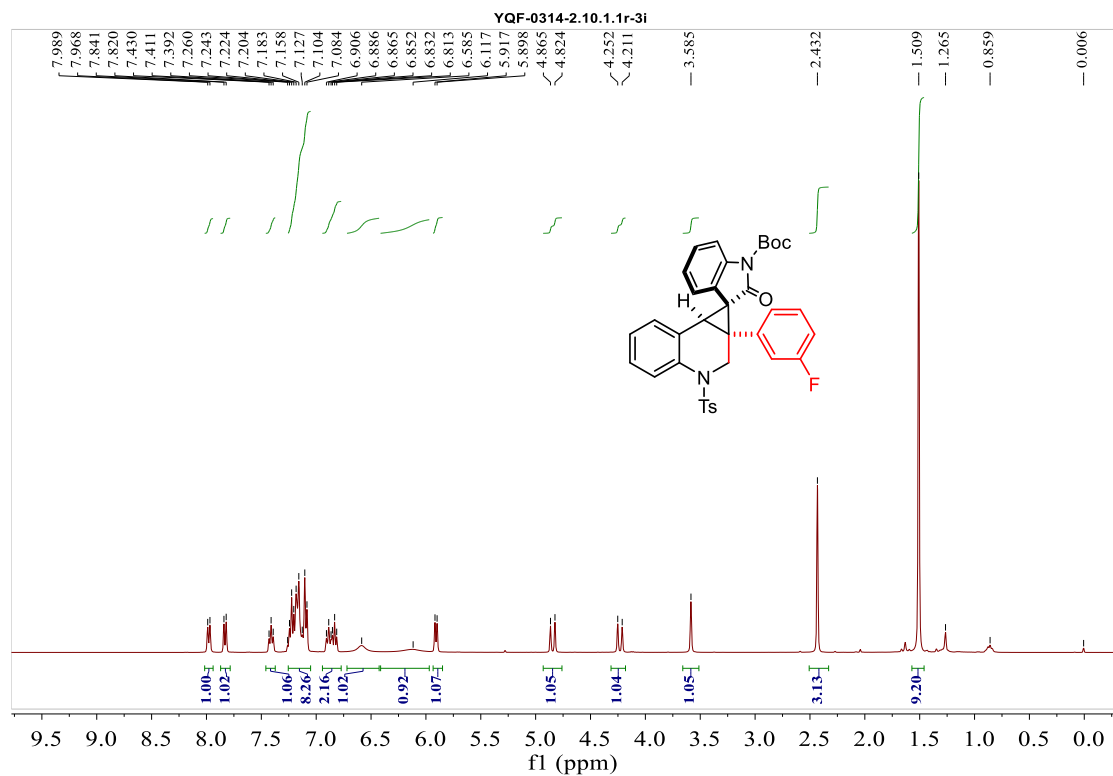

<sup>13</sup>C NMR (101 MHz, CDCl<sub>3</sub>) of **6m**

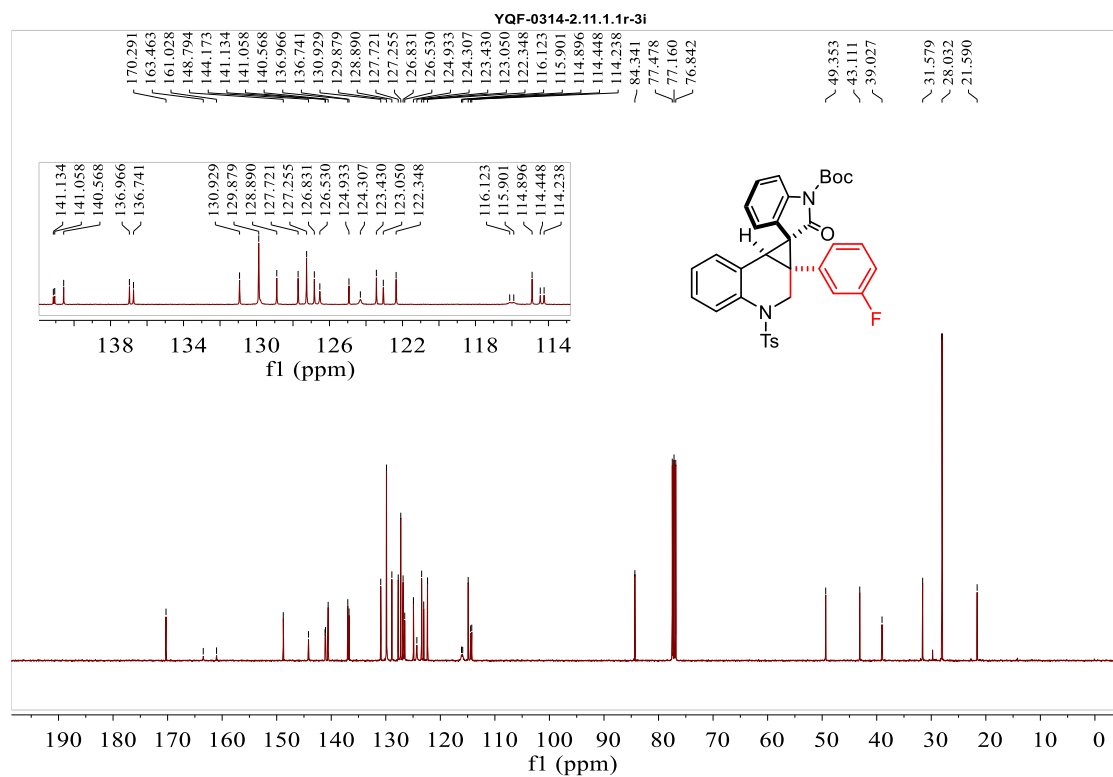

<sup>1</sup>H NMR (400 MHz, CDCl<sub>3</sub>) of **6n**

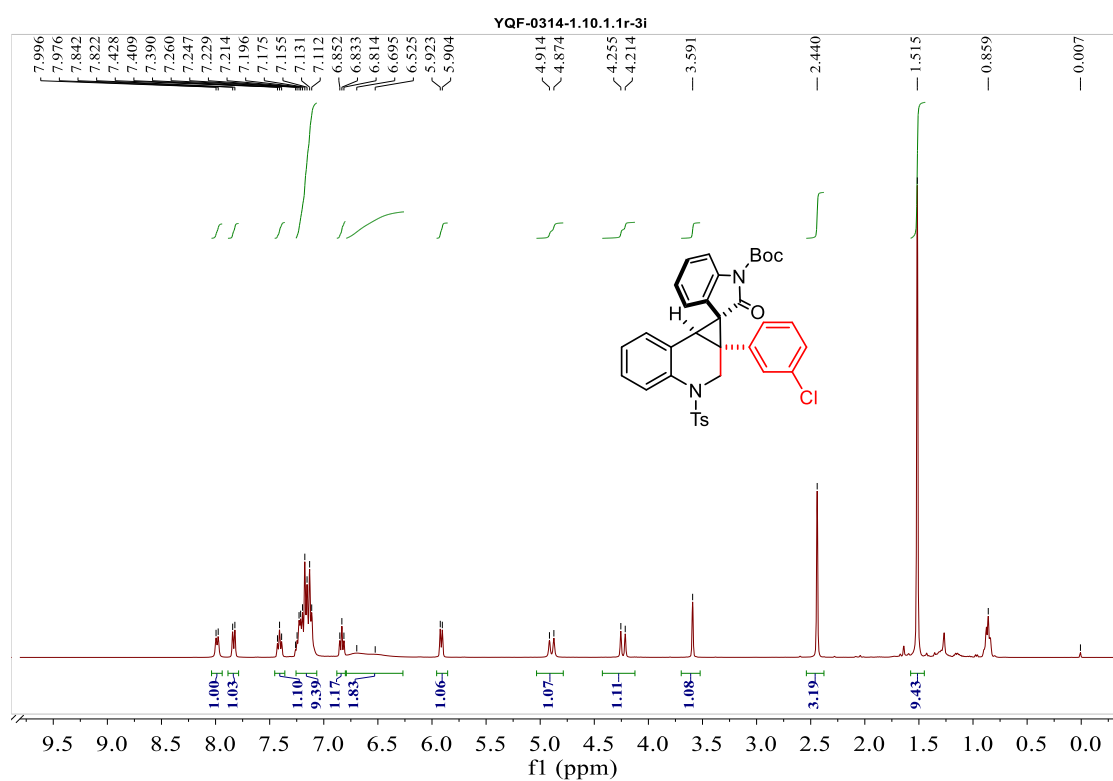

<sup>13</sup>C NMR (101 MHz, CDCl<sub>3</sub>) of **6n**

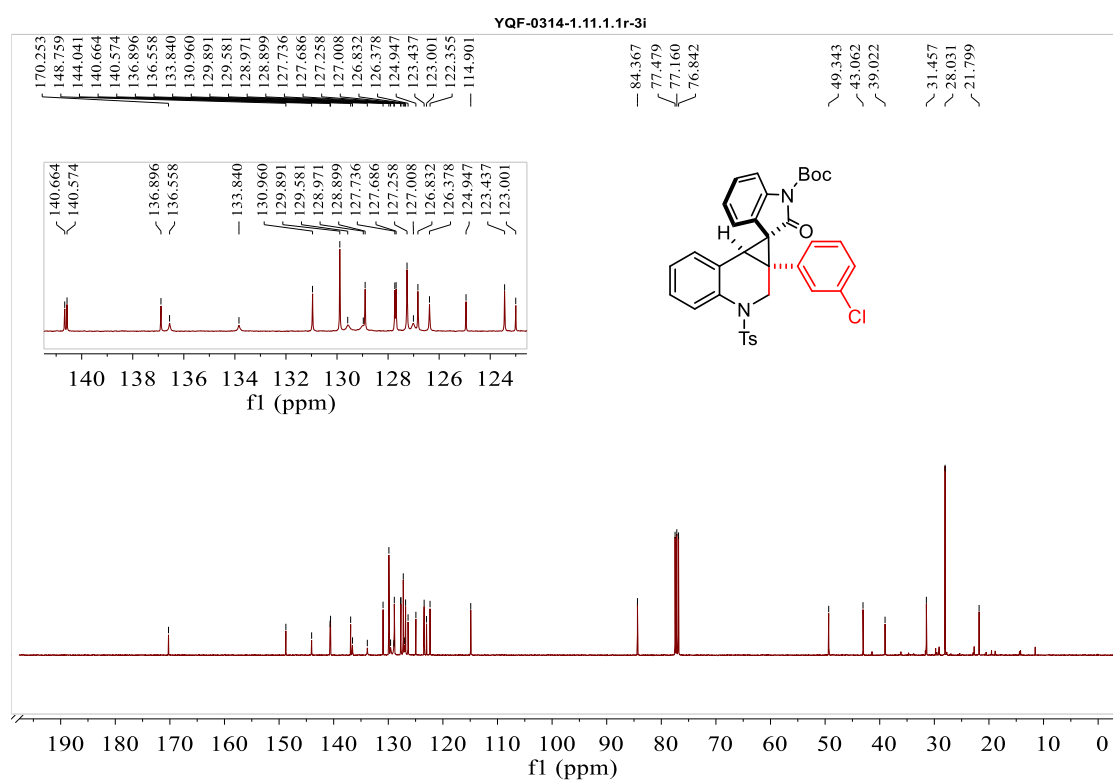

<sup>1</sup>H NMR (400 MHz, CDCl<sub>3</sub>) of **60**

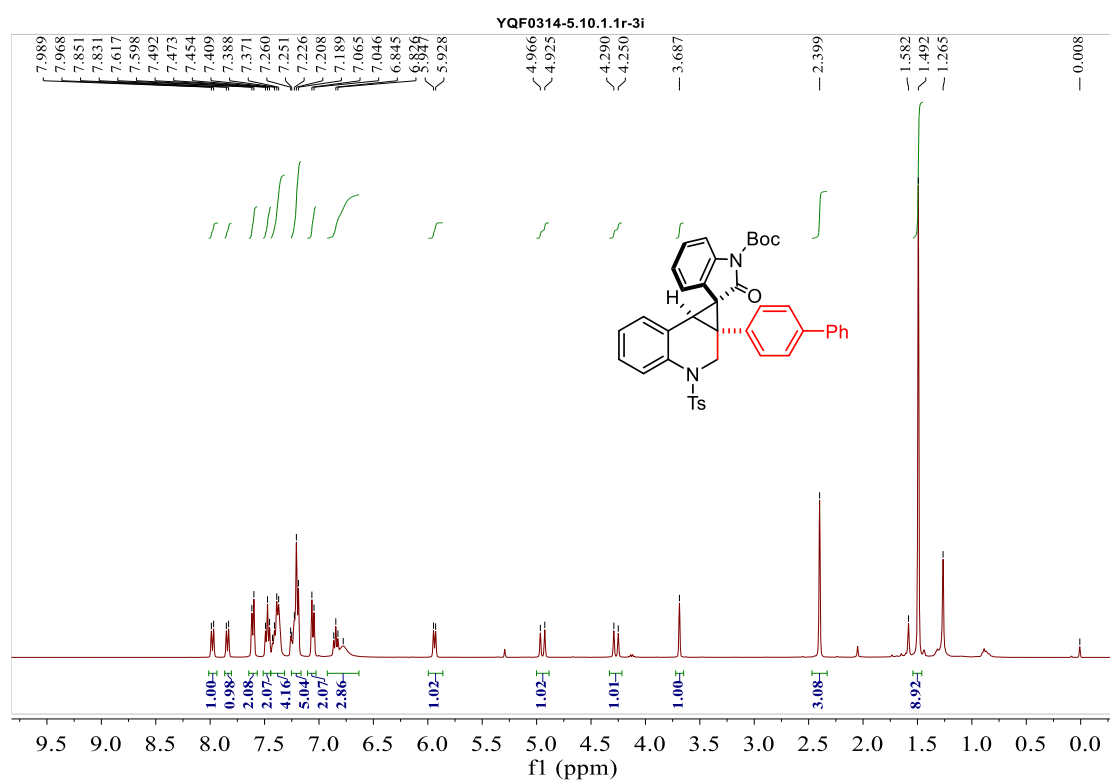

<sup>13</sup>C NMR (101 MHz, CDCl<sub>3</sub>) of **60**

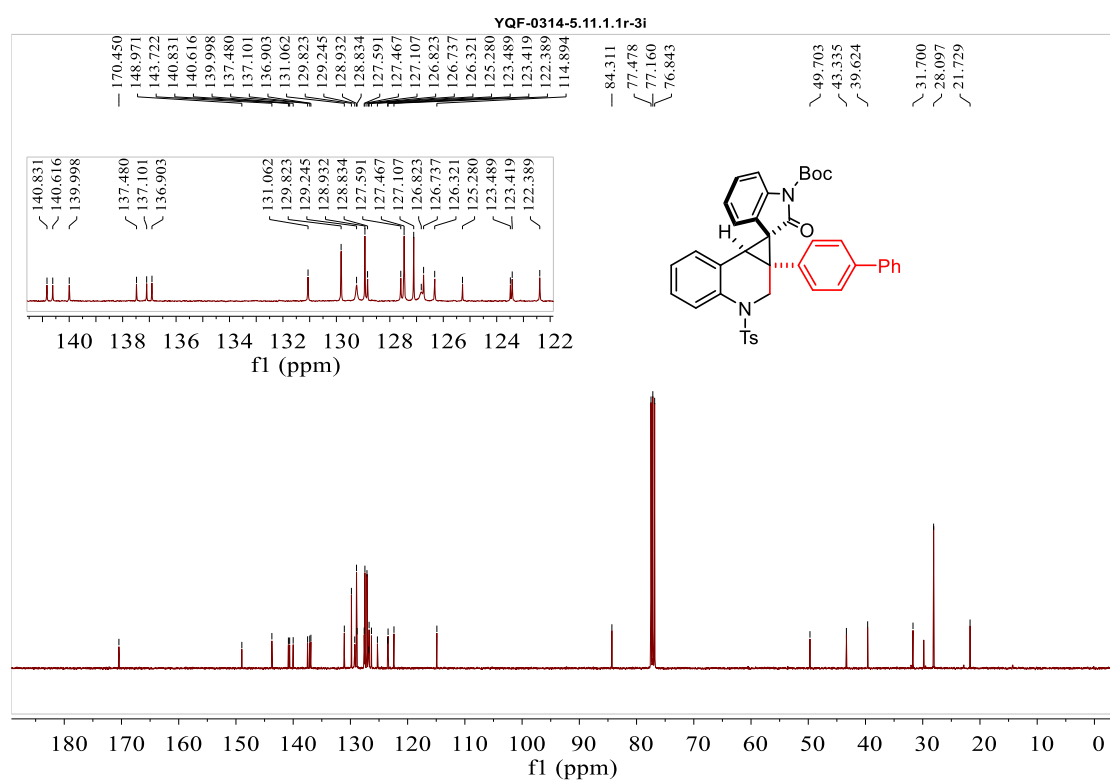

<sup>1</sup>H NMR (400 MHz, CDCl<sub>3</sub>) of **6p**

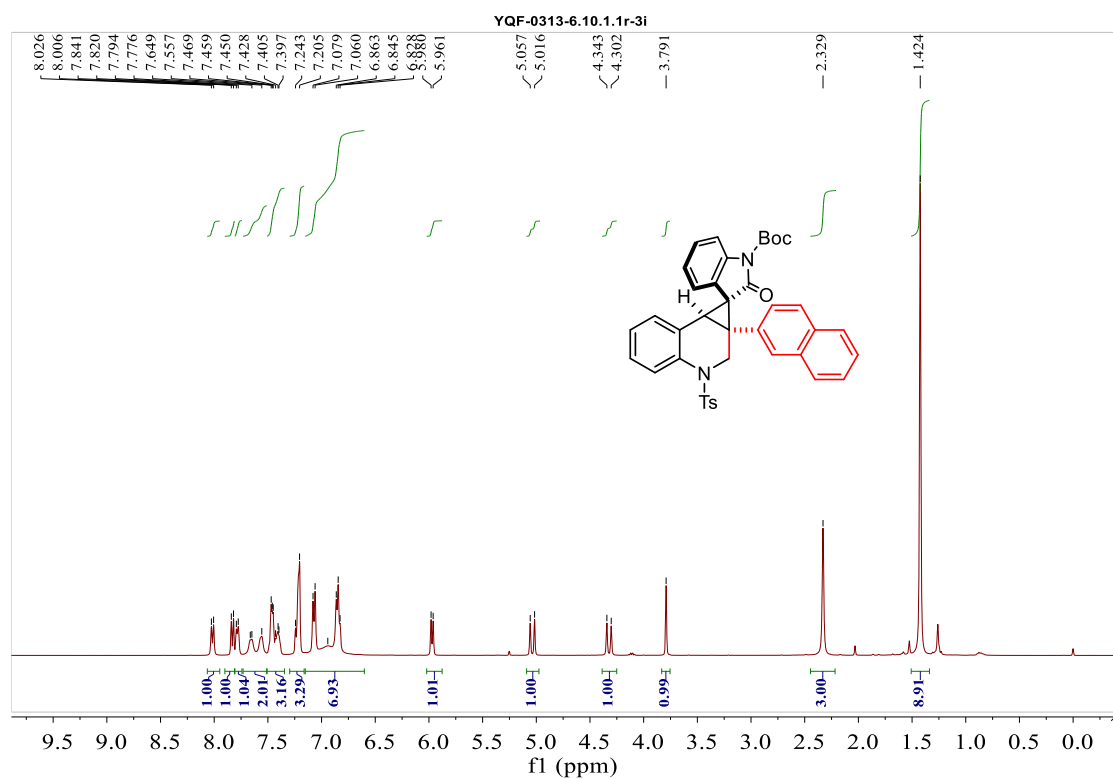

<sup>13</sup>C NMR (101 MHz, CDCl<sub>3</sub>) of **6p**

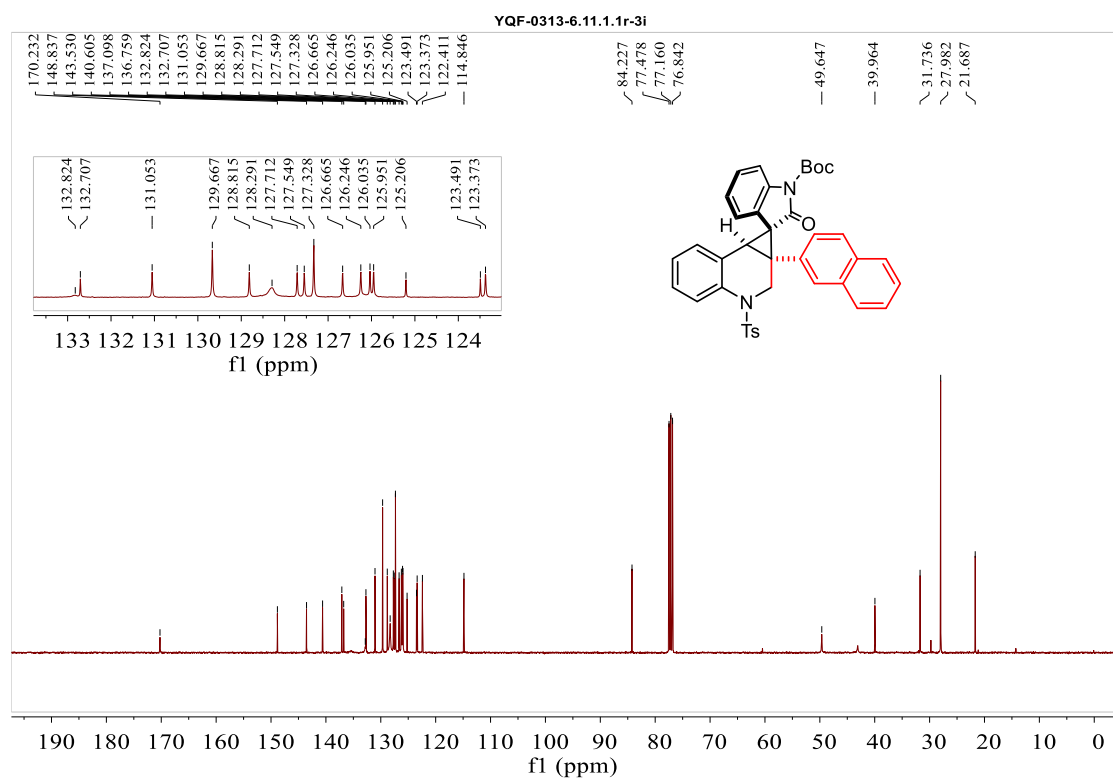

<sup>1</sup>H NMR (400 MHz, CDCl<sub>3</sub>) of **8a**

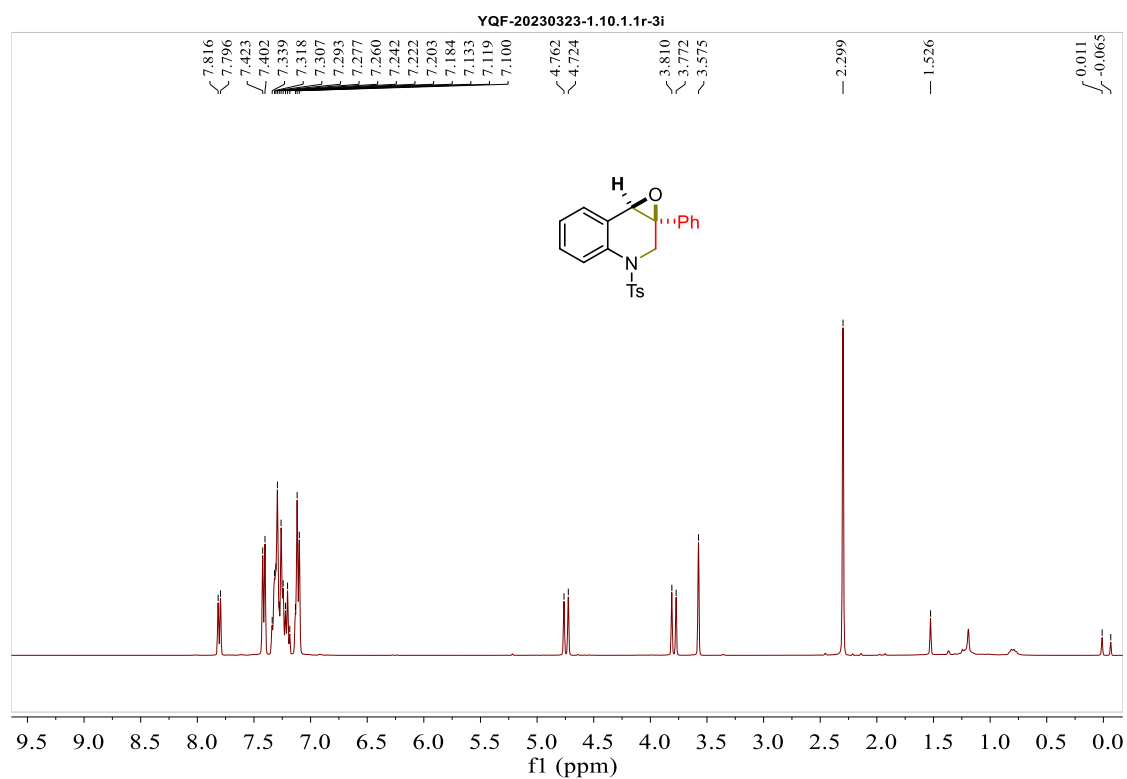

<sup>13</sup>C NMR (101 MHz, CDCl<sub>3</sub>) of **8a**

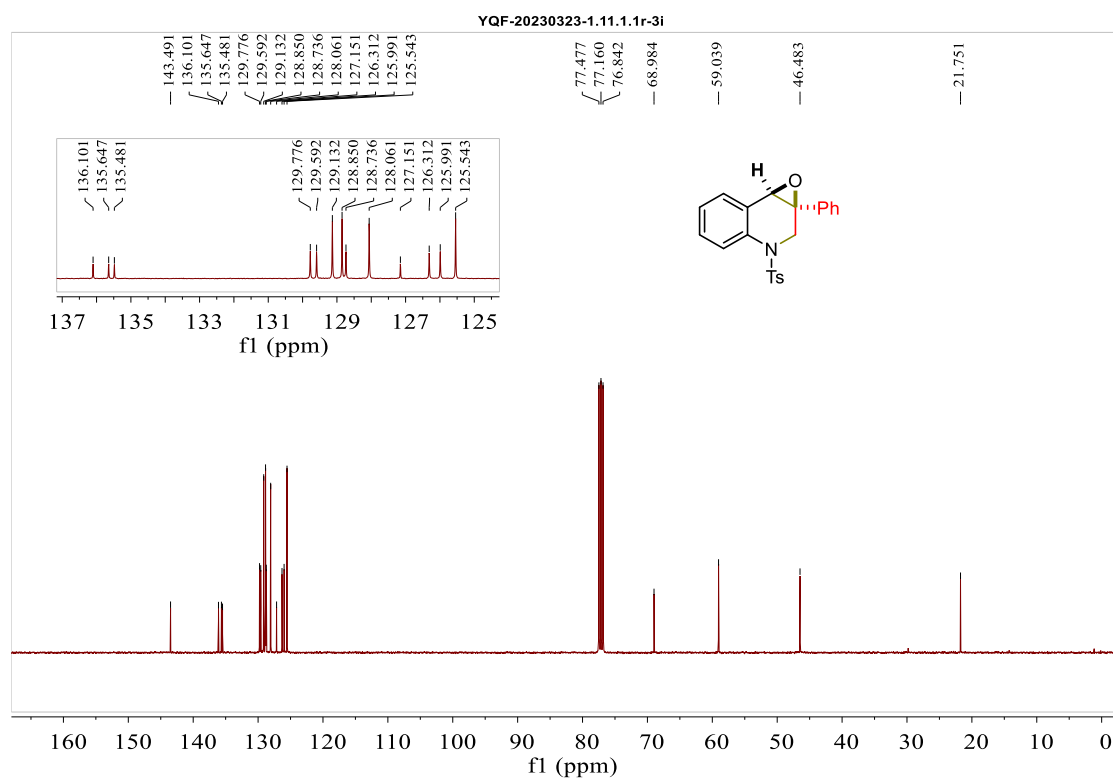

<sup>1</sup>H NMR (400 MHz, CDCl<sub>3</sub>) of **8b**

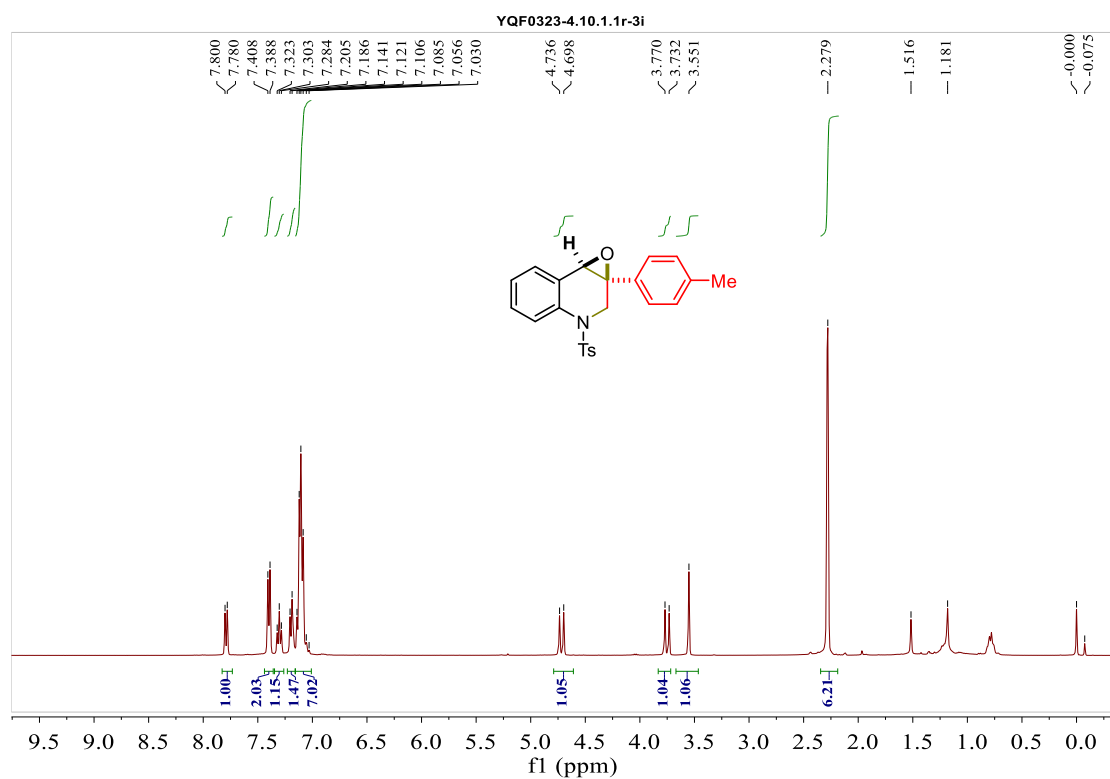

<sup>13</sup>C NMR (101 MHz, CDCl<sub>3</sub>) of **8b**

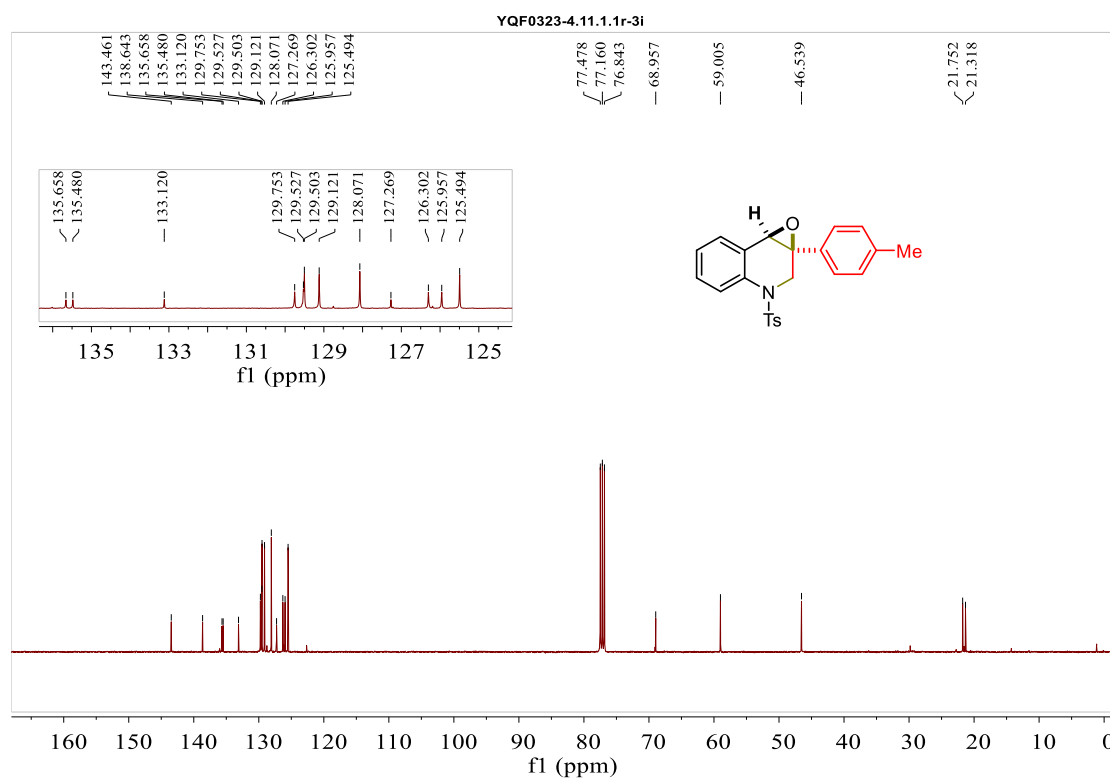

<sup>1</sup>H NMR (400 MHz, CDCl<sub>3</sub>) of **8c**

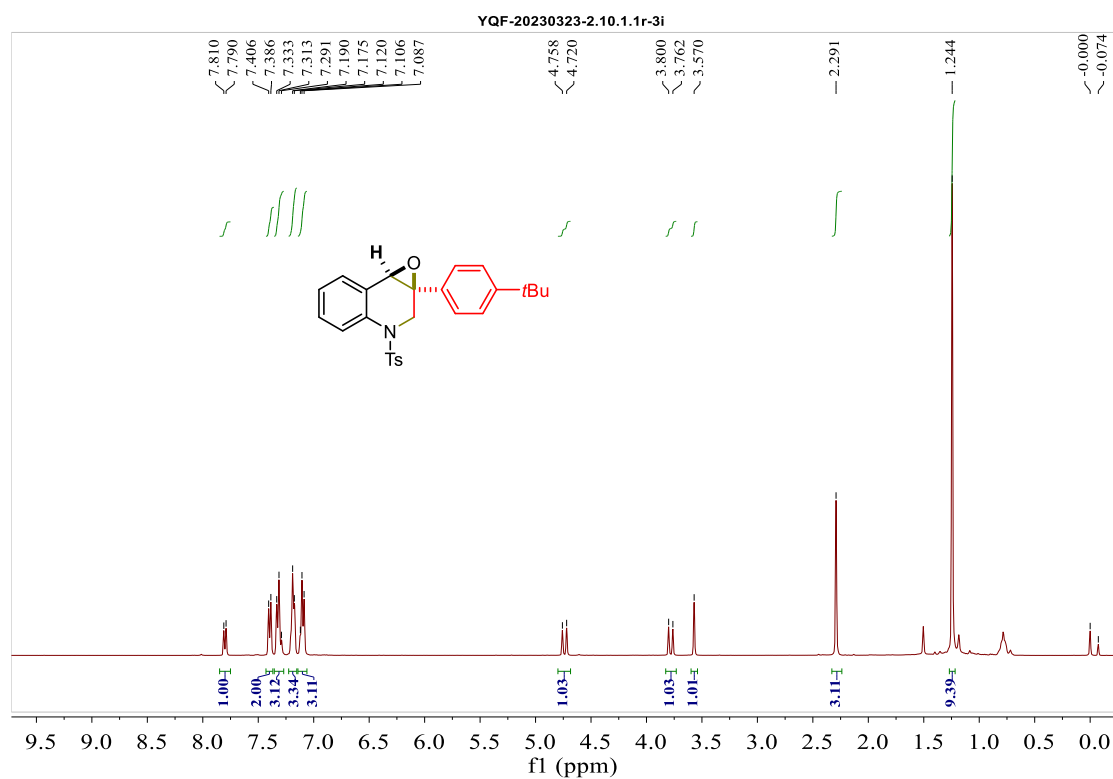

<sup>13</sup>C NMR (101 MHz, CDCl<sub>3</sub>) of **8c**

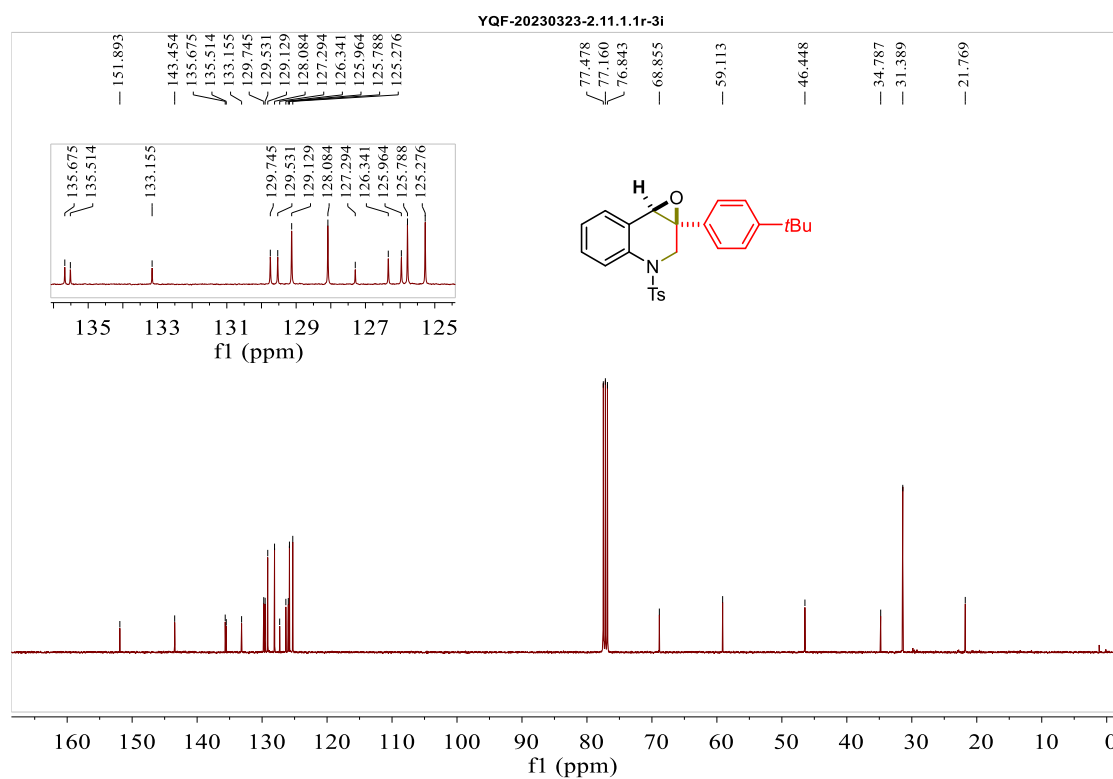

<sup>1</sup>H NMR (400 MHz, CDCl<sub>3</sub>) of **8d**

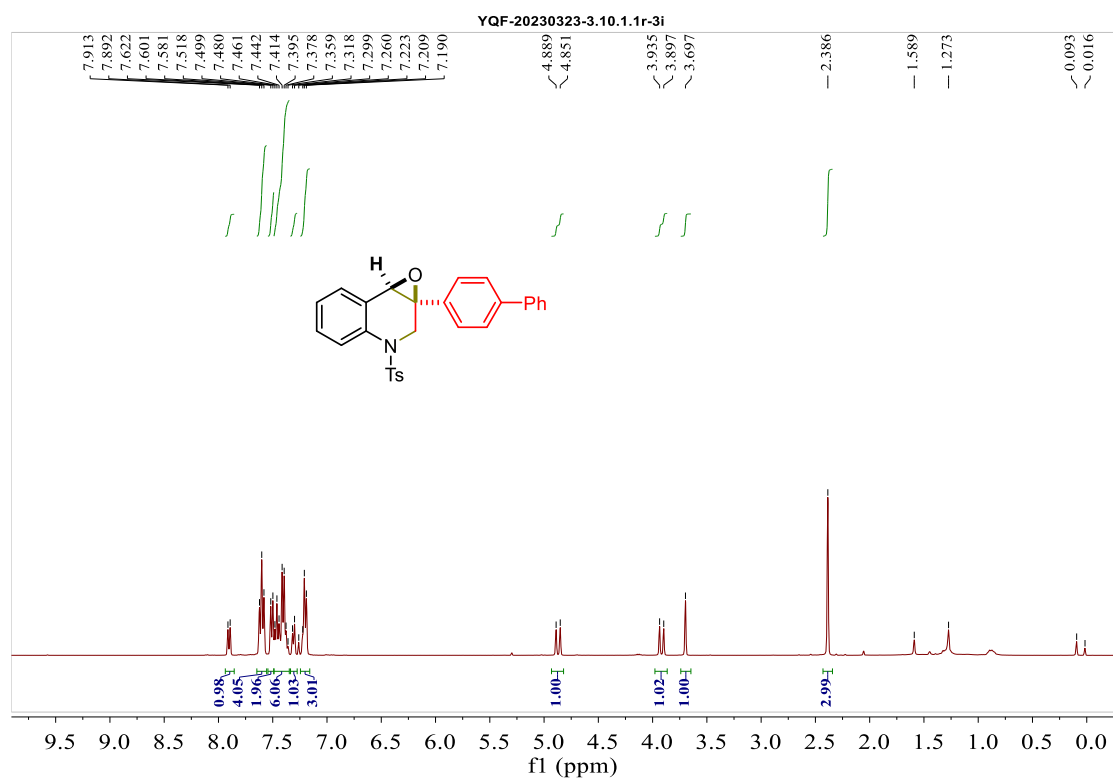

<sup>13</sup>C NMR (101 MHz, CDCl<sub>3</sub>) of **8d**

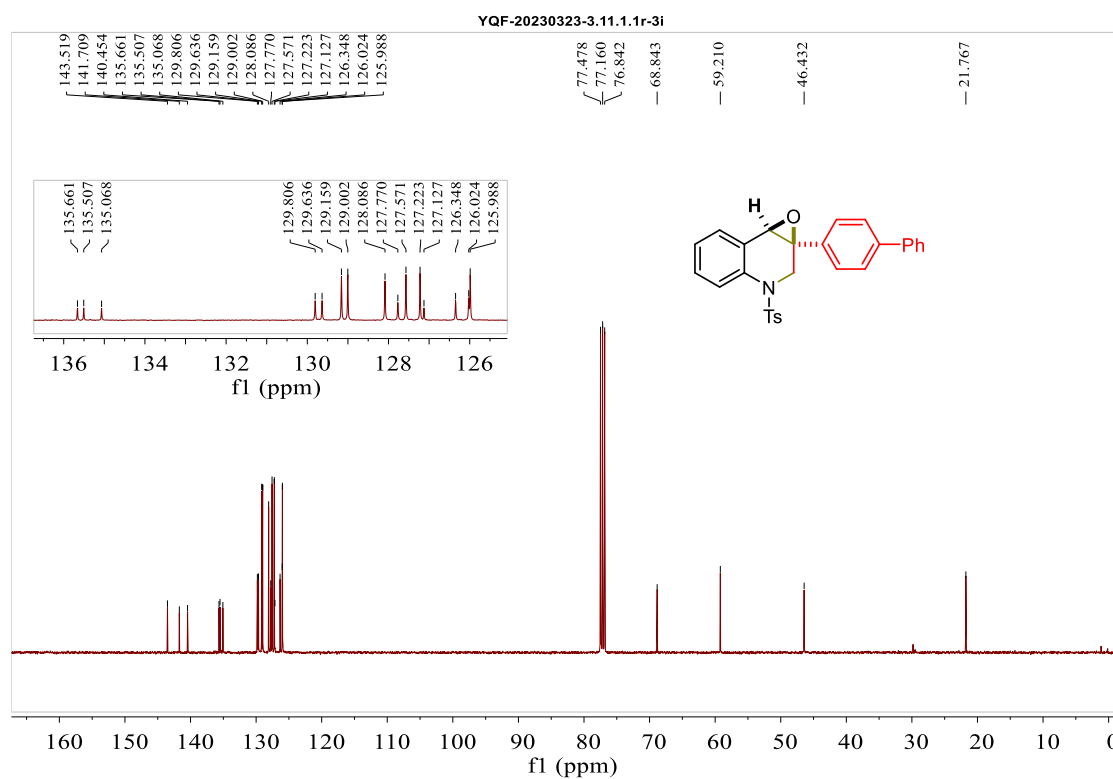



<sup>1</sup>H NMR (400 MHz, CDCl<sub>3</sub>) of **8e**

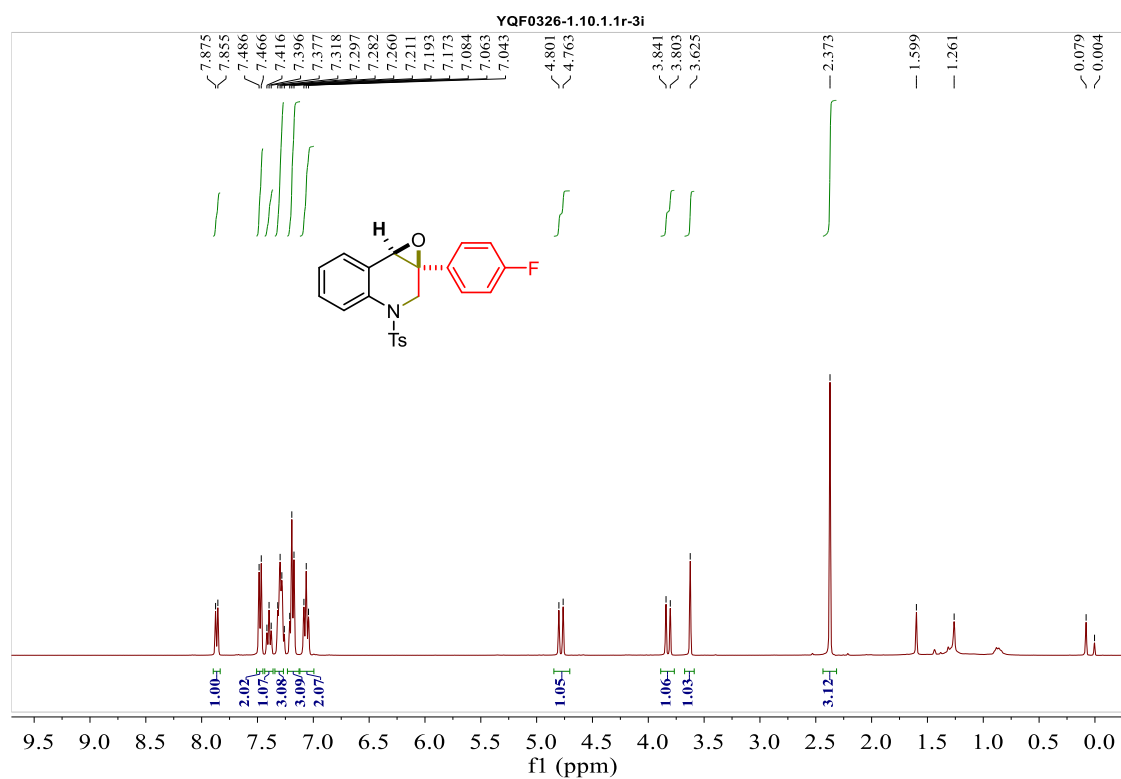

<sup>13</sup>C NMR (101 MHz, CDCl<sub>3</sub>) of **8e**

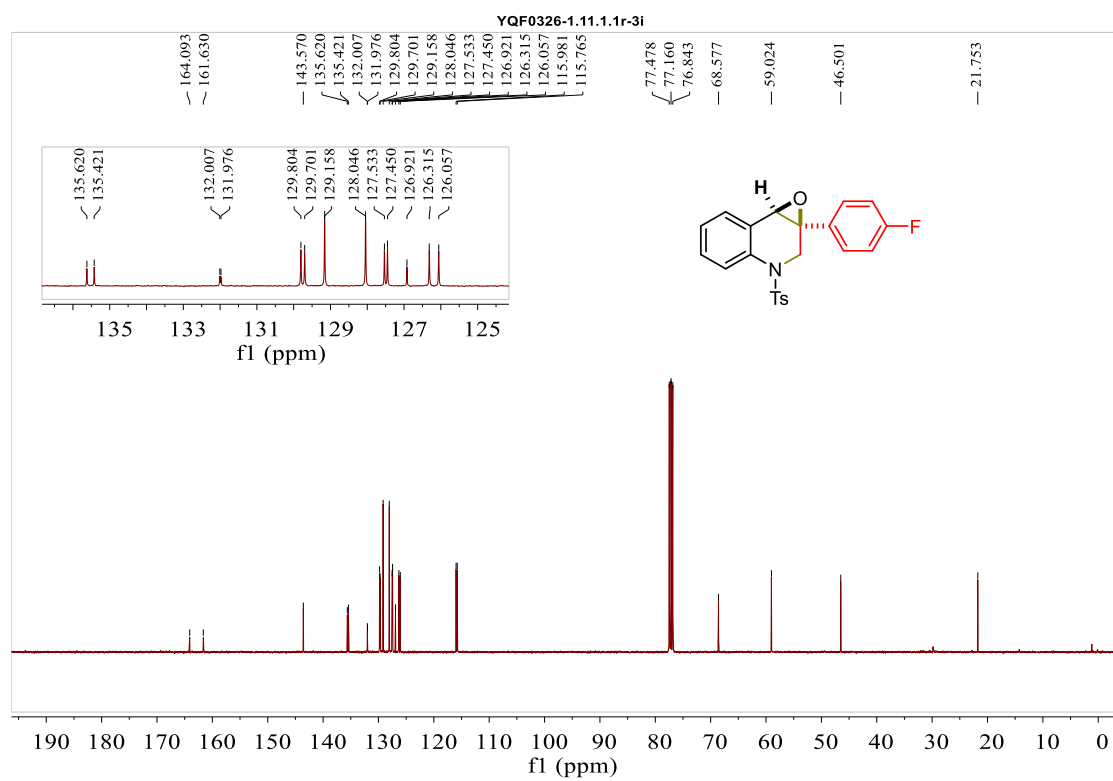

<sup>1</sup>H NMR (400 MHz, CDCl<sub>3</sub>) of **8f**

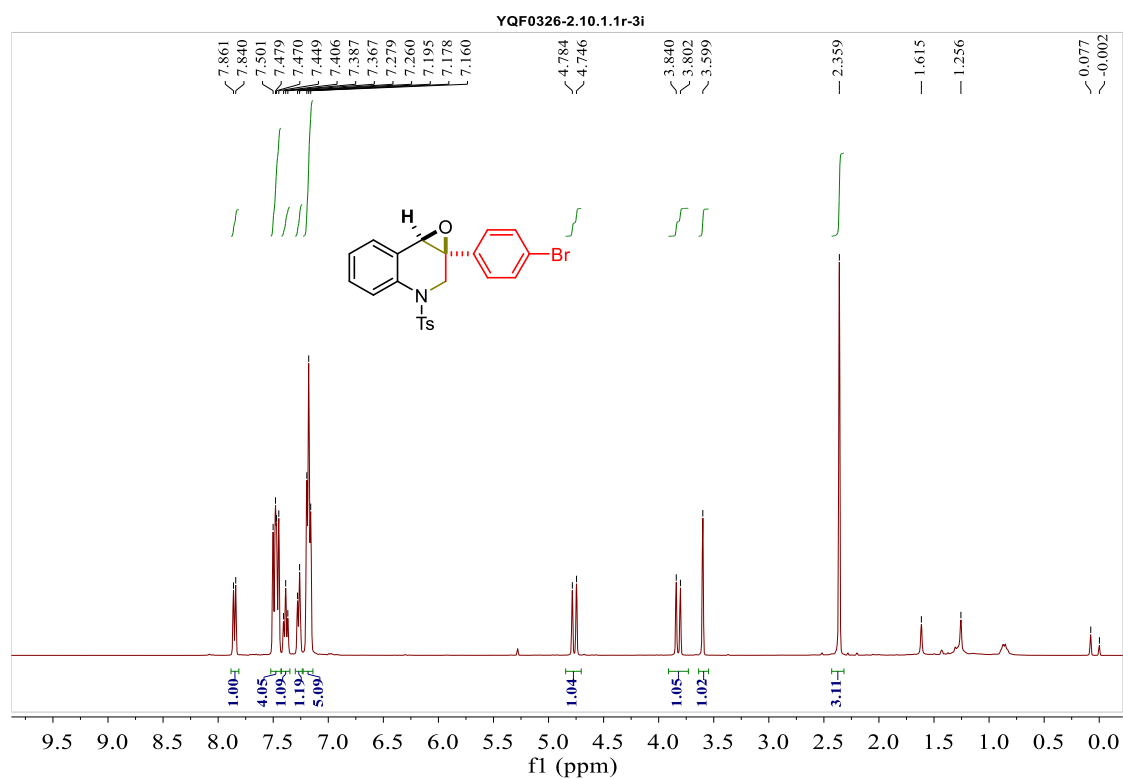

<sup>13</sup>C NMR (101 MHz, CDCl<sub>3</sub>) of **8f**

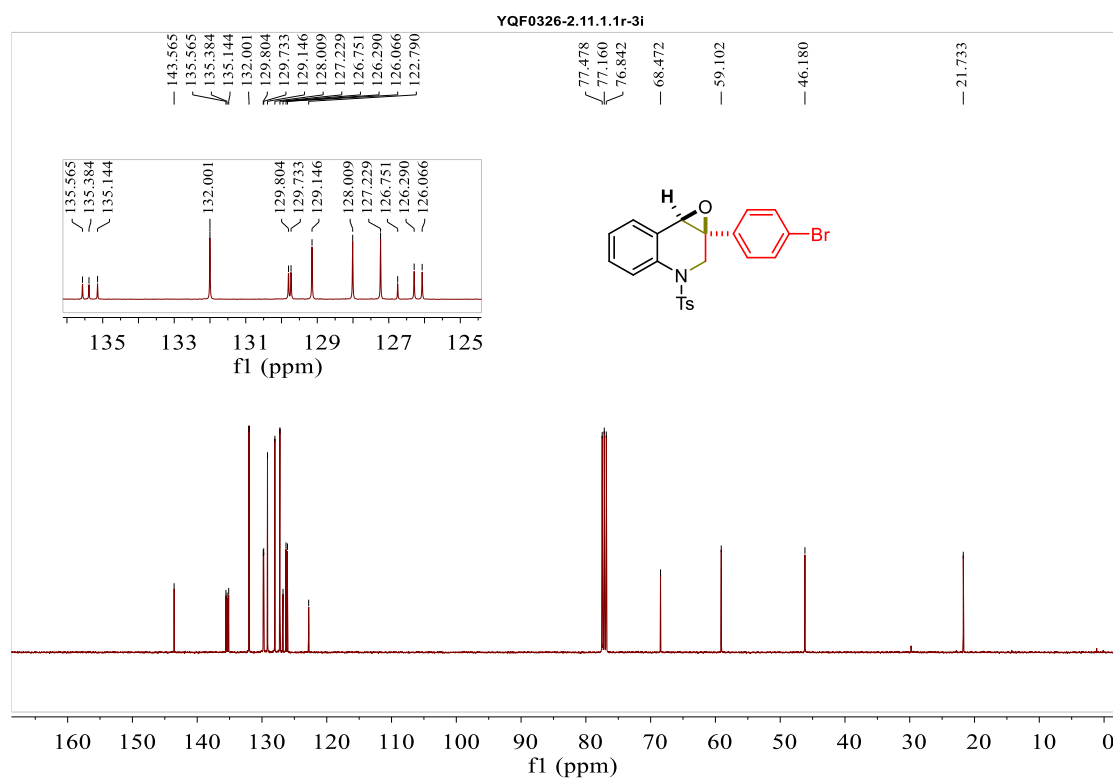

<sup>1</sup>H NMR (400 MHz, CDCl<sub>3</sub>) of **8g**

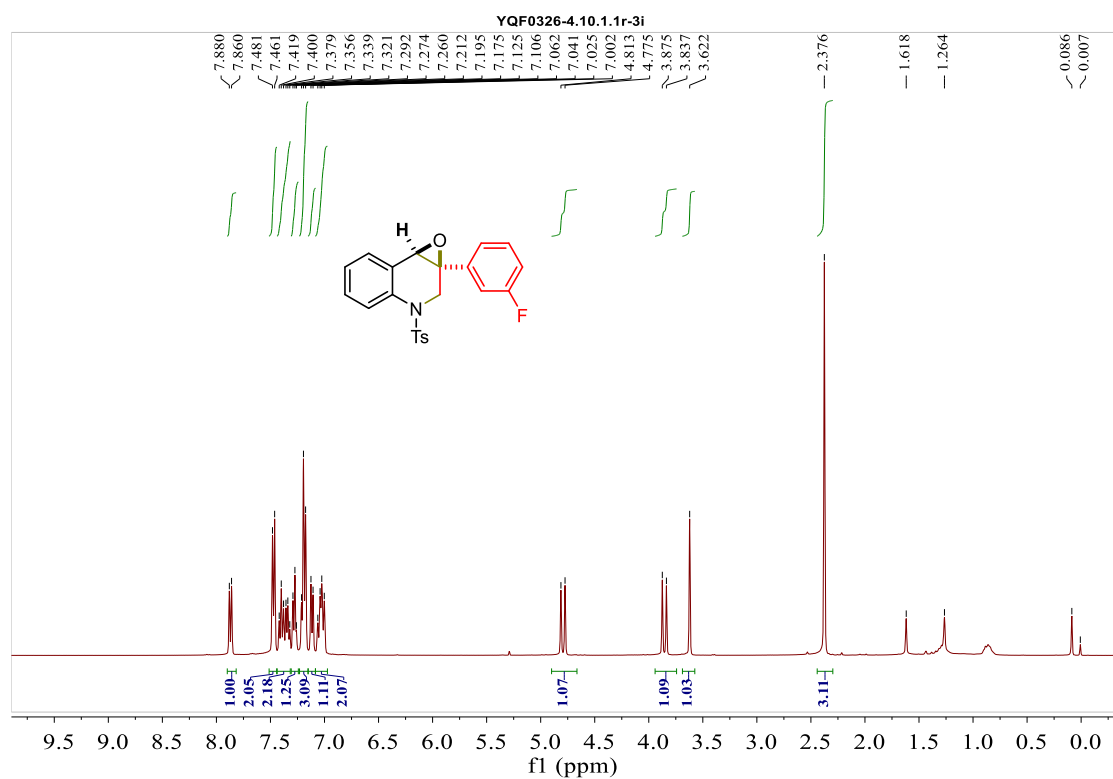

<sup>13</sup>C NMR (101 MHz, CDCl<sub>3</sub>) of **8g**

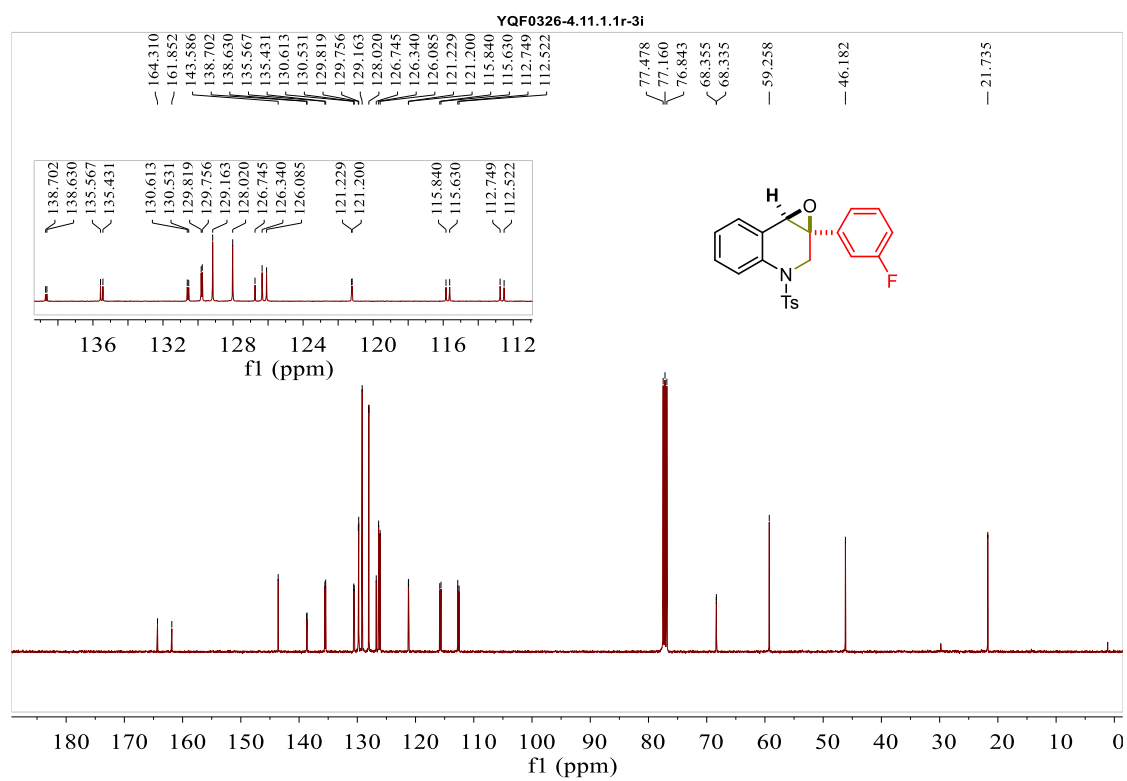

<sup>1</sup>H NMR (400 MHz, CDCl<sub>3</sub>) of **8h**

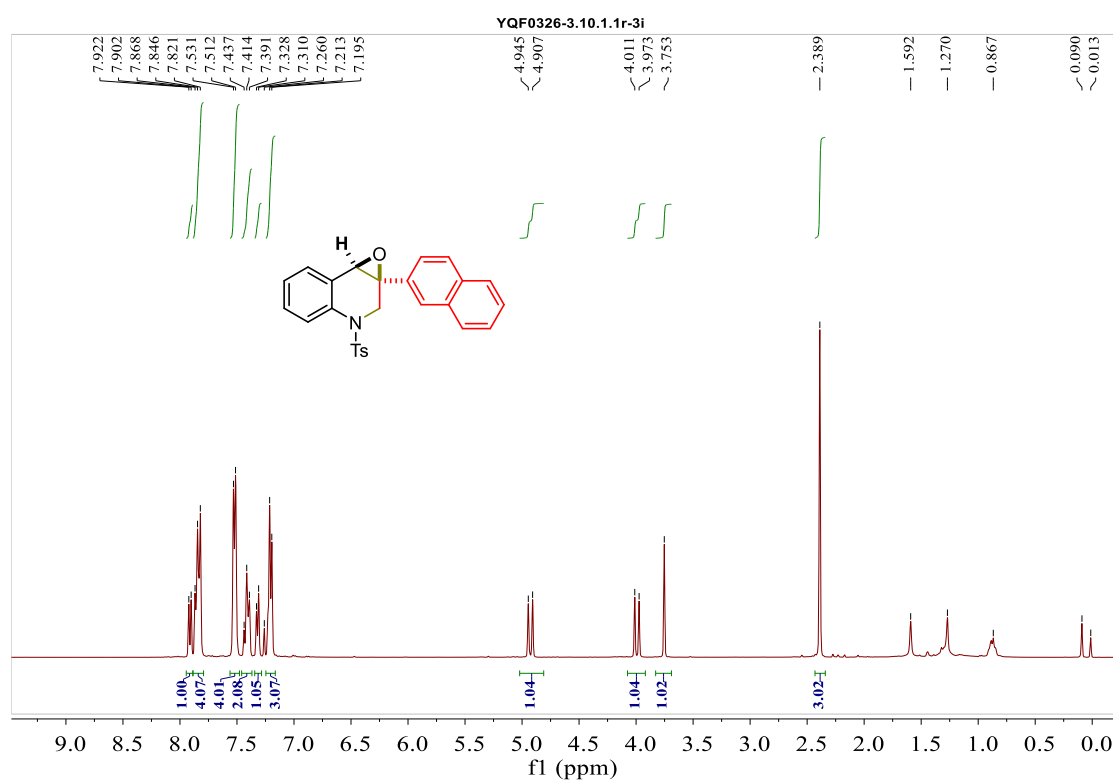

<sup>13</sup>C NMR (101 MHz, CDCl<sub>3</sub>) of **8h**

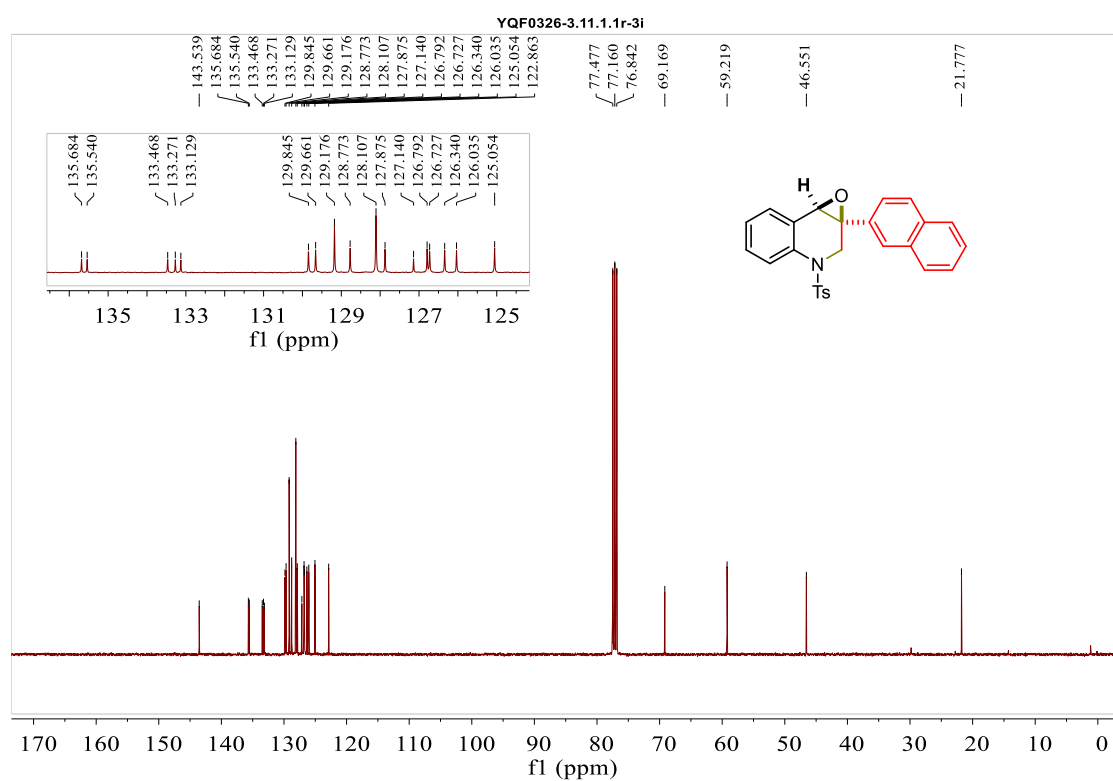

<sup>1</sup>H NMR (400 MHz, CDCl<sub>3</sub>) of **8i**

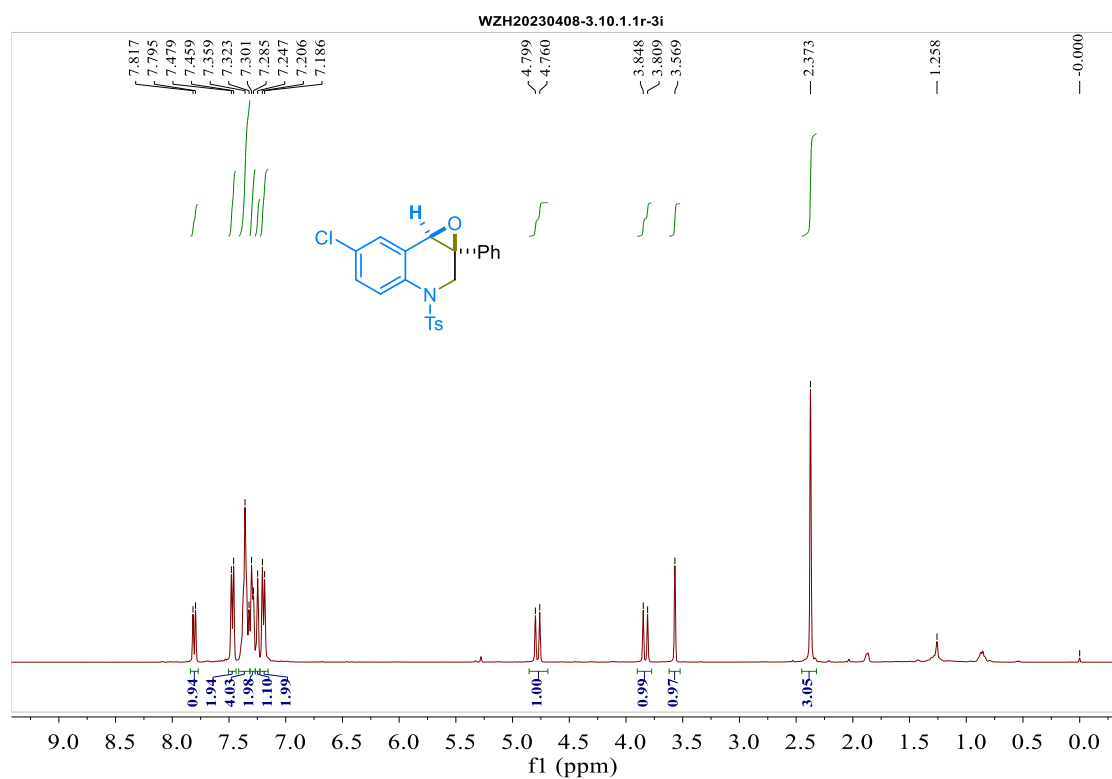

<sup>13</sup>C NMR (101 MHz, CDCl<sub>3</sub>) of **8i**

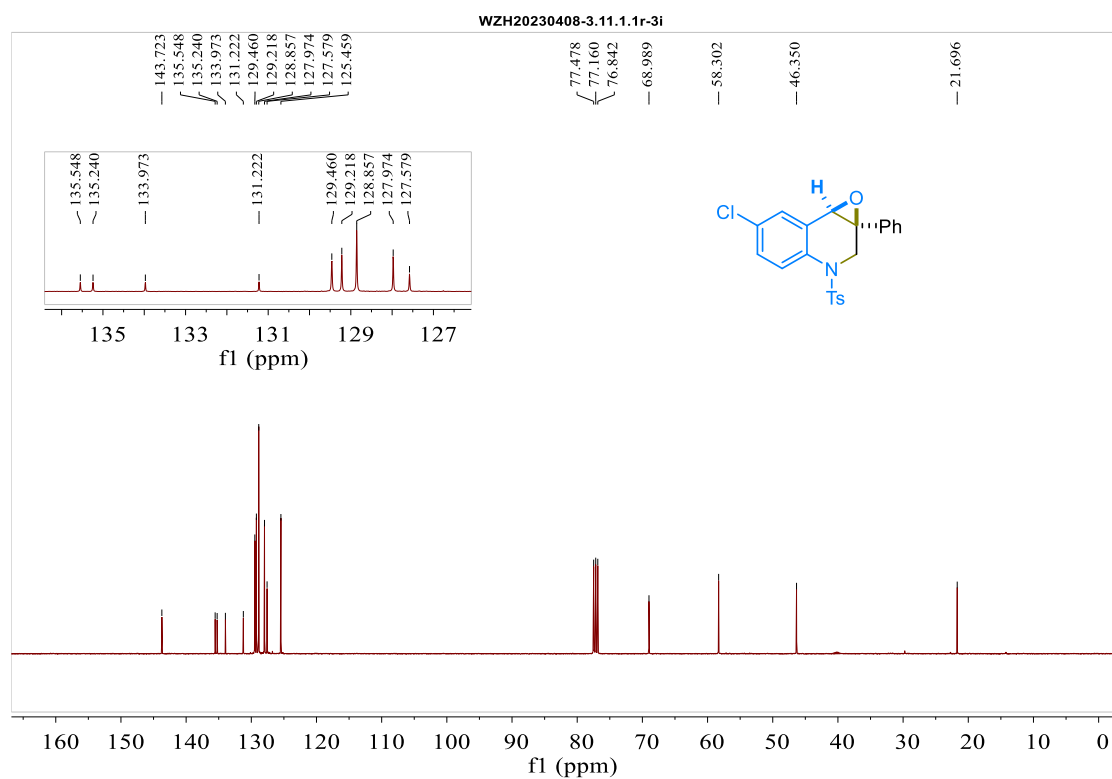

<sup>1</sup>H NMR (400 MHz, CDCl<sub>3</sub>) of **8j**

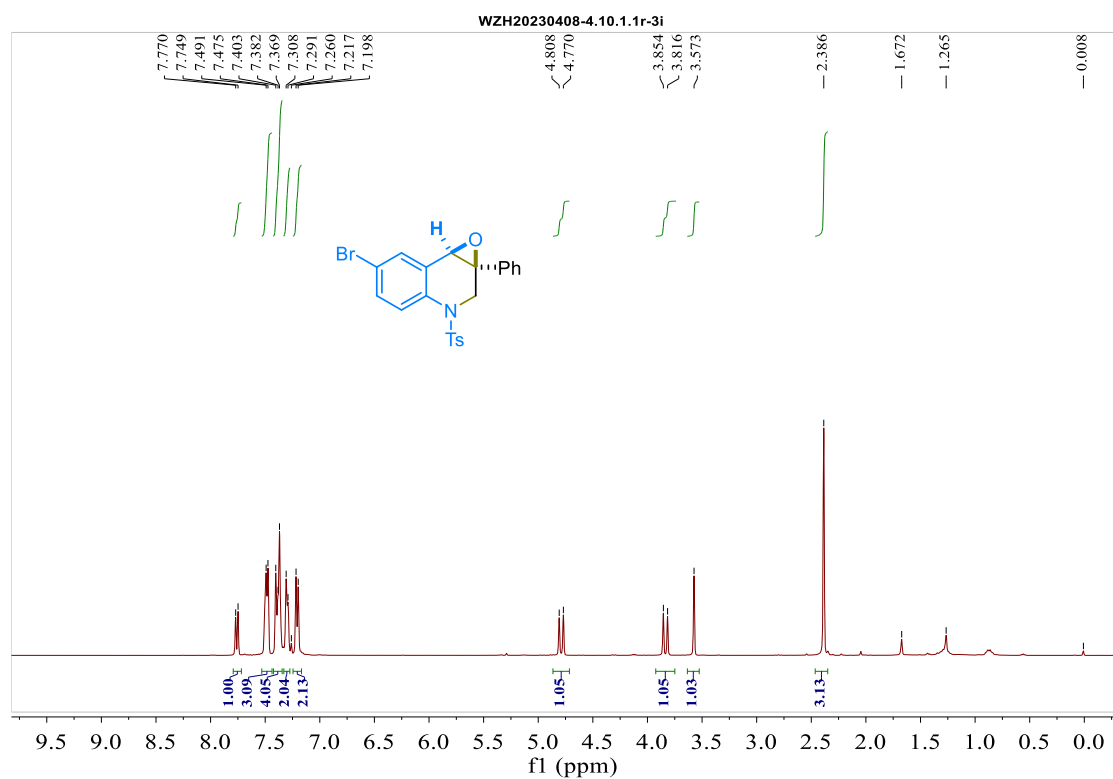

<sup>13</sup>C NMR (101 MHz, CDCl<sub>3</sub>) of **8j**

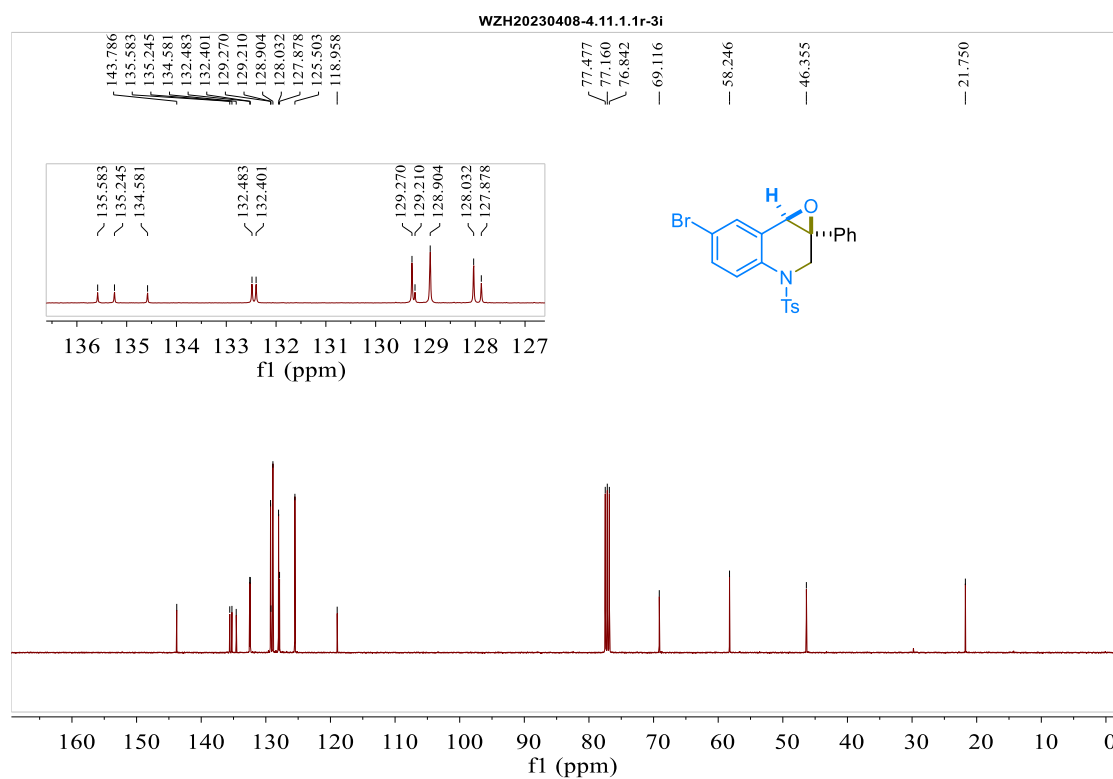

<sup>1</sup>H NMR (400 MHz, CDCl<sub>3</sub>) of **8k**

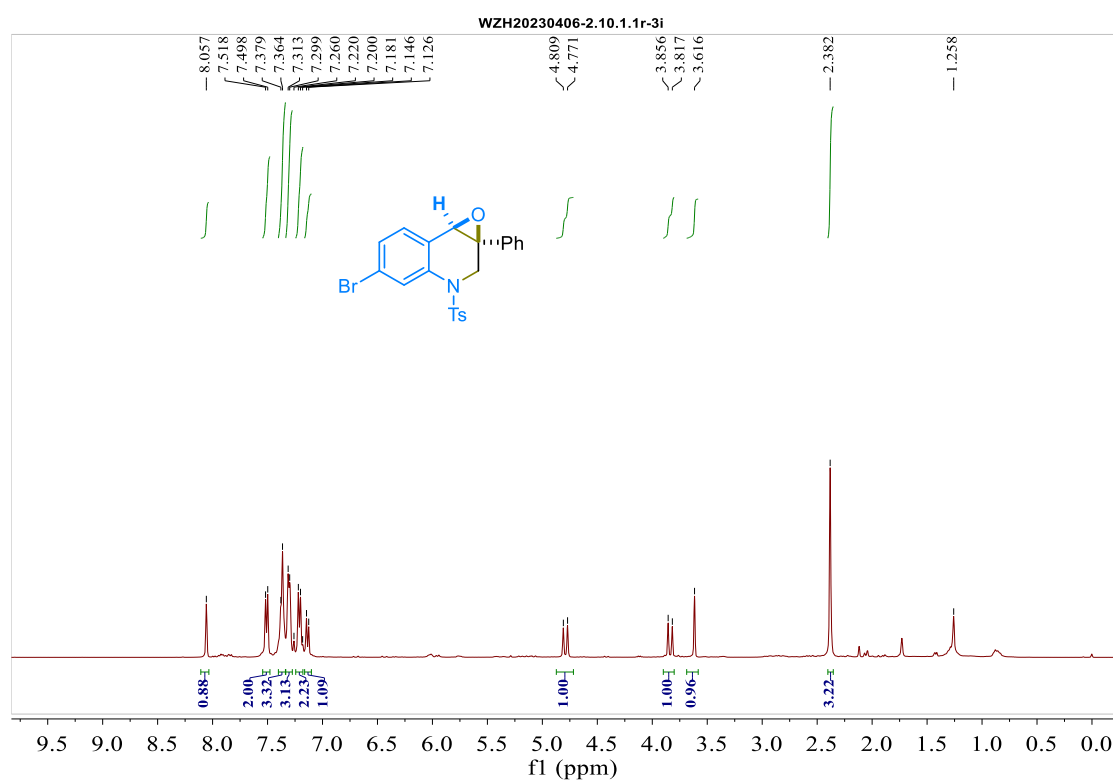

<sup>13</sup>C NMR (101 MHz, CDCl<sub>3</sub>) of **8k**

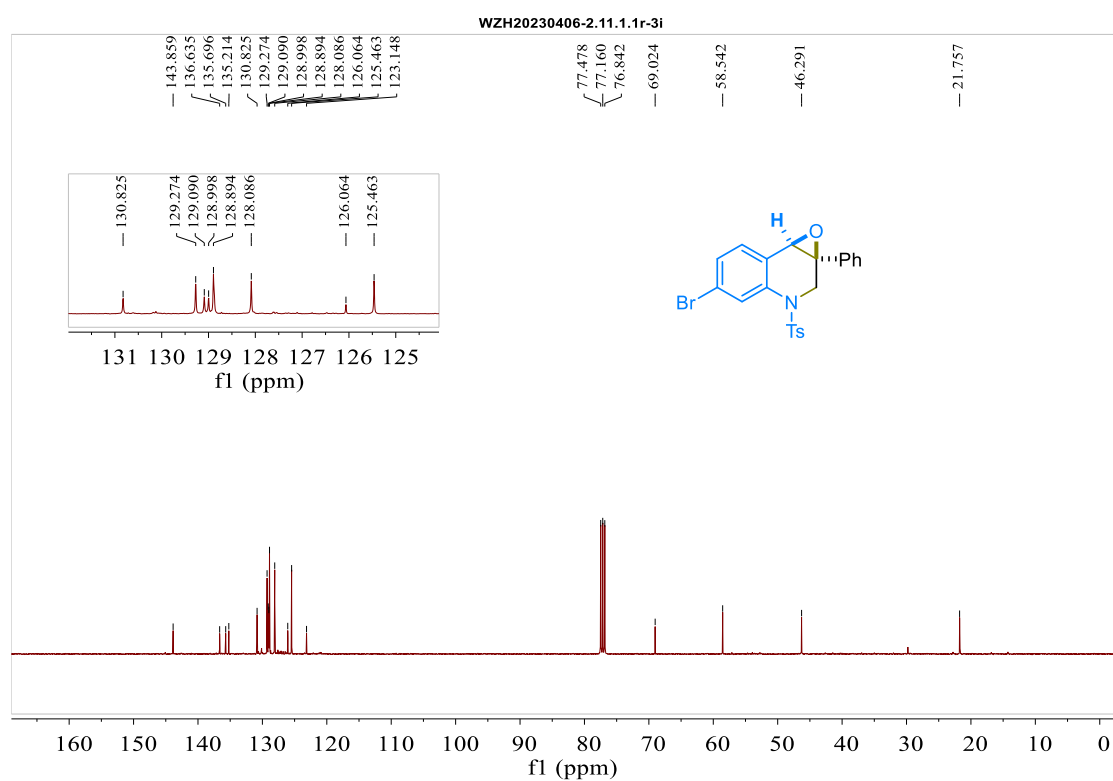

<sup>1</sup>H NMR (400 MHz, CDCl<sub>3</sub>) of **8I**

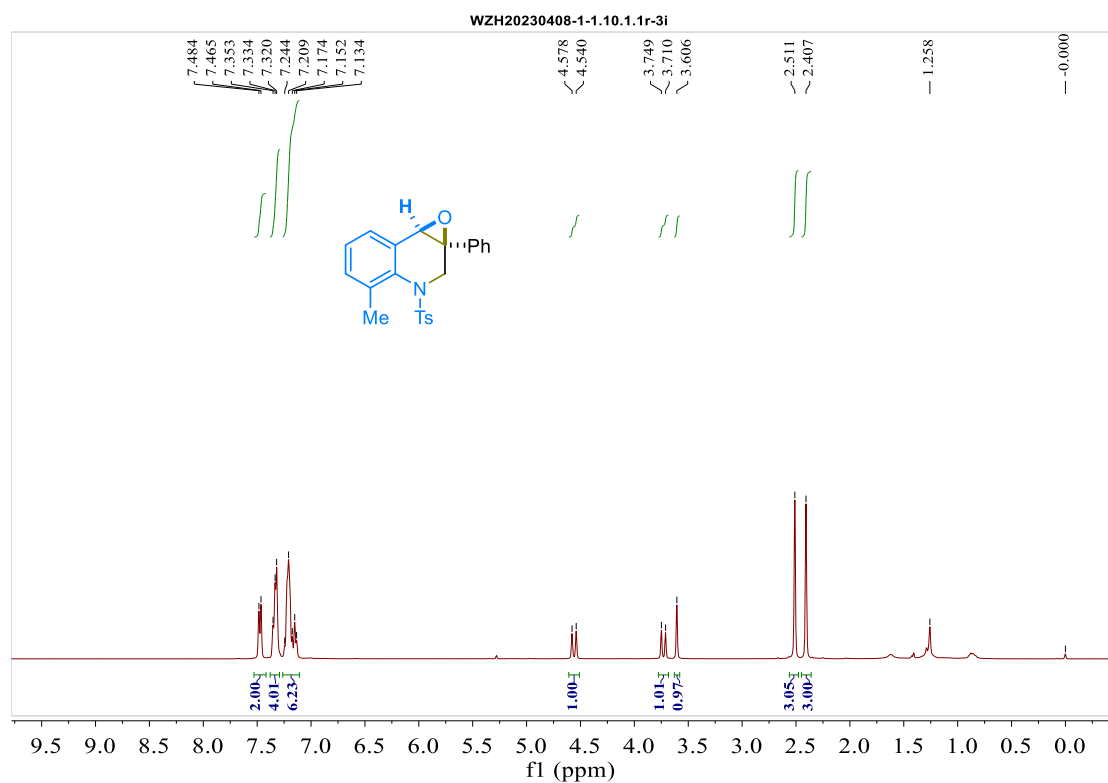

<sup>13</sup>C NMR (101 MHz, CDCl<sub>3</sub>) of **8I**

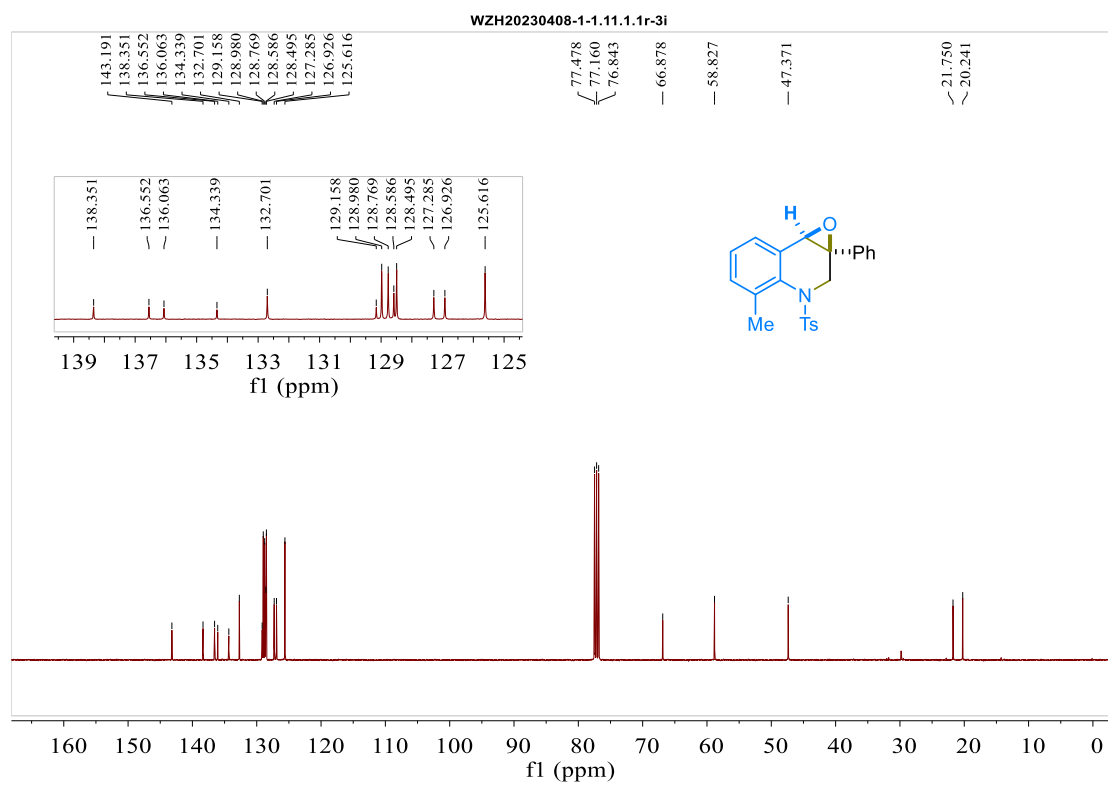



### <sup>1</sup>H NMR (300 MHz, CDCl<sub>3</sub>) of **9**

cd-wzh-2019-70.1.fid — WZH-1970

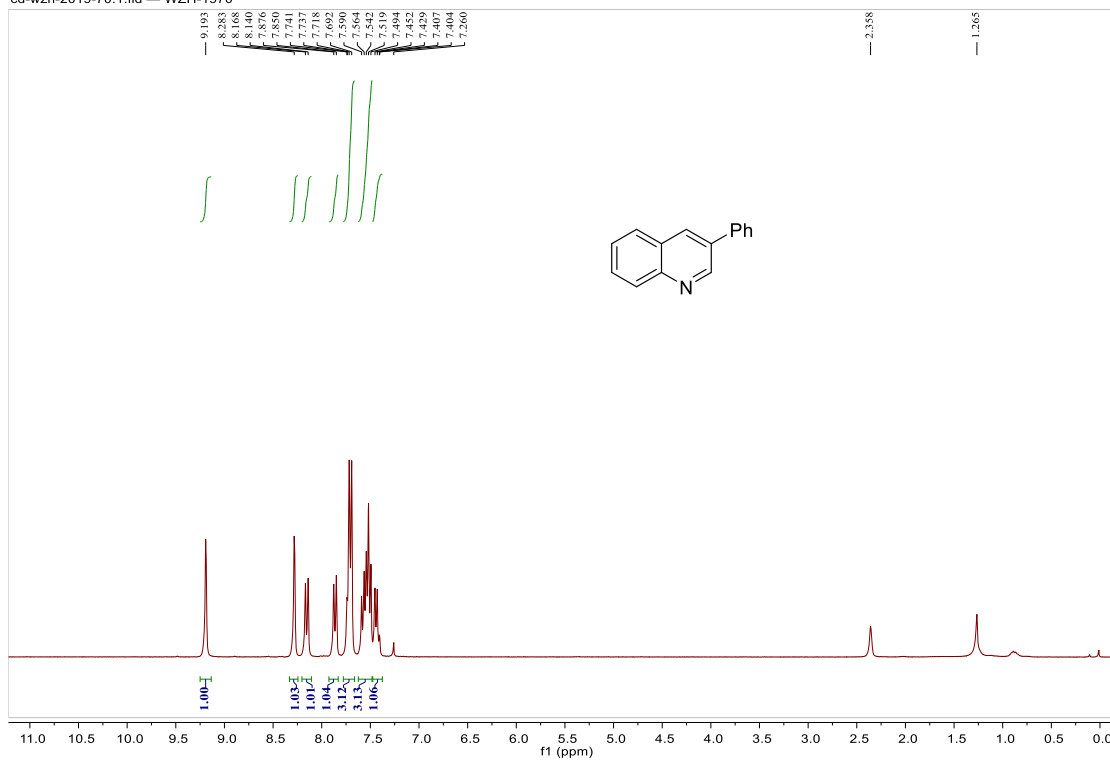

### <sup>13</sup>C NMR (75 MHz, CDCl<sub>3</sub>) of **9**

cd-wzh-2019-70.2.fid — WZH-1970 13C

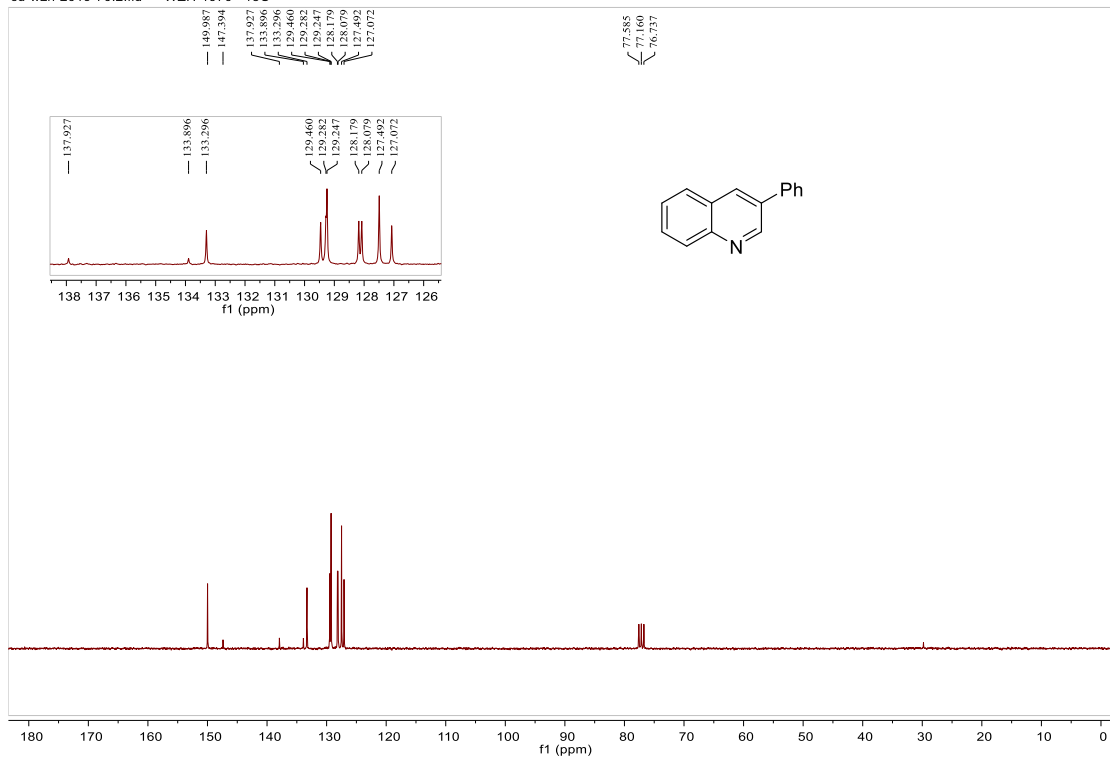

### <sup>1</sup>H NMR (300 MHz, CDCl<sub>3</sub>) of 10

cd-wzh-2019-71.1.fid — WZH-1971

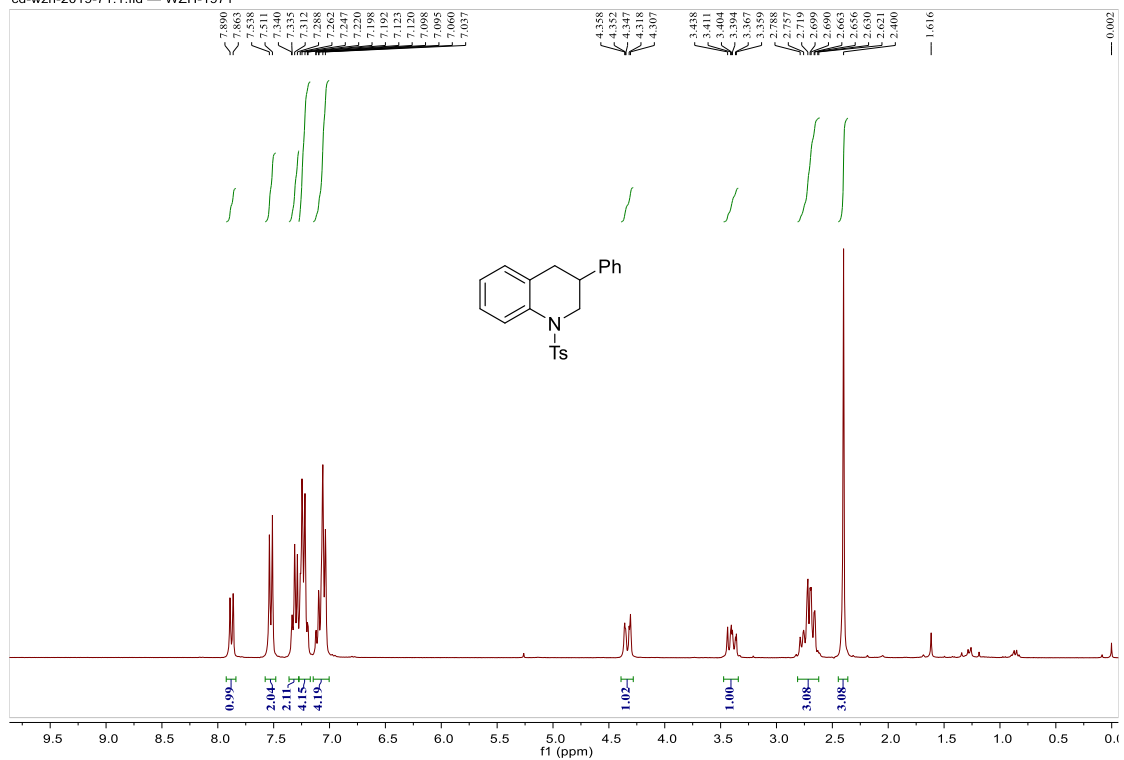

### <sup>13</sup>C NMR (75 MHz, CDCl<sub>3</sub>) of 10

cd-wzh-2019-71.2.fid — WZH-1971 13C

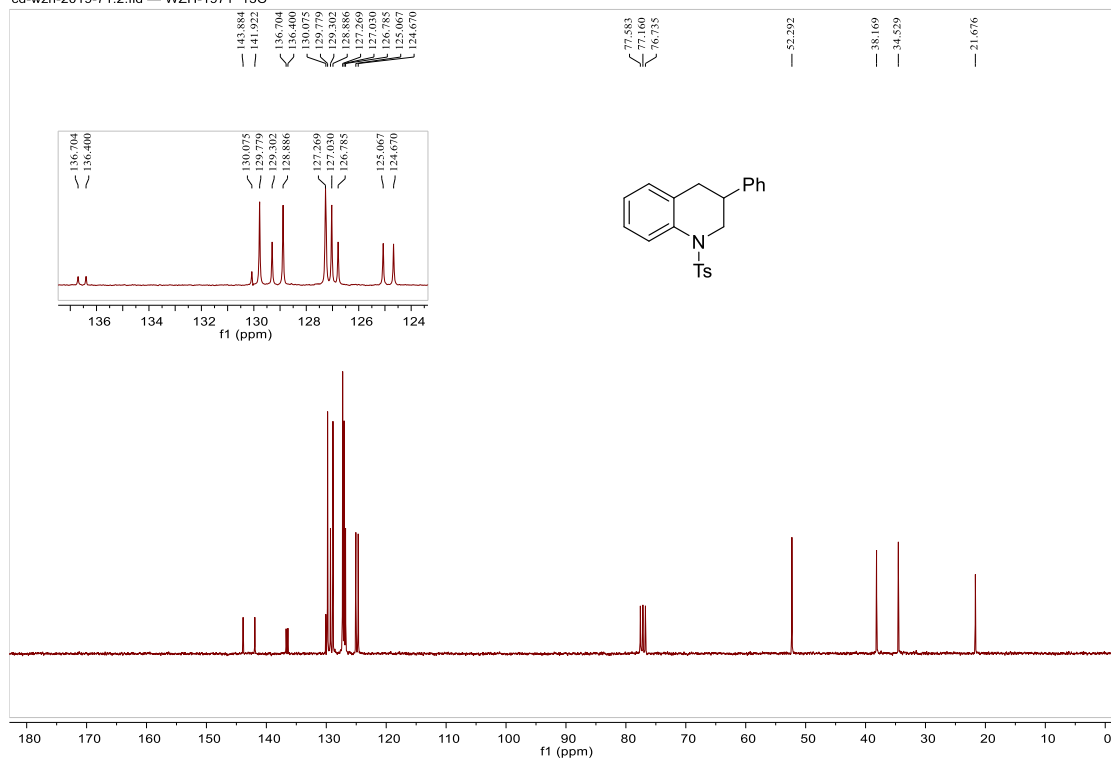

<sup>1</sup>H NMR (400 MHz, CDCl<sub>3</sub>) of **11**

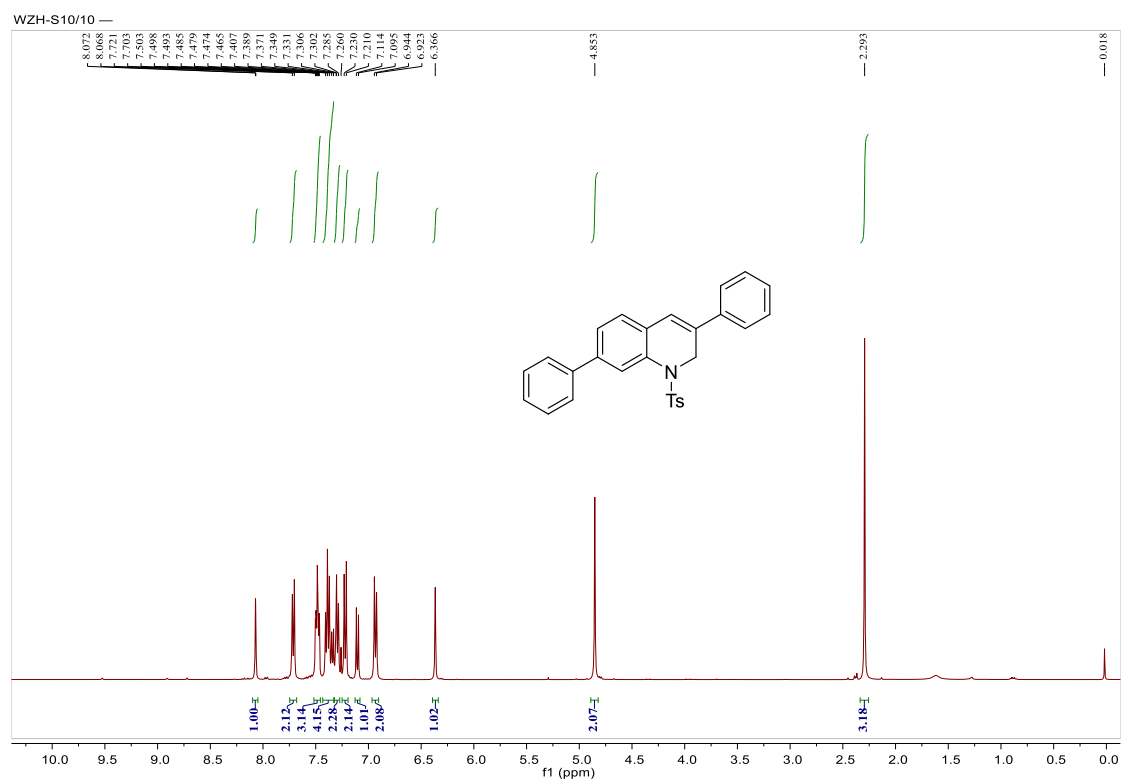

<sup>13</sup>C NMR (101 MHz, CDCl<sub>3</sub>) of **11**

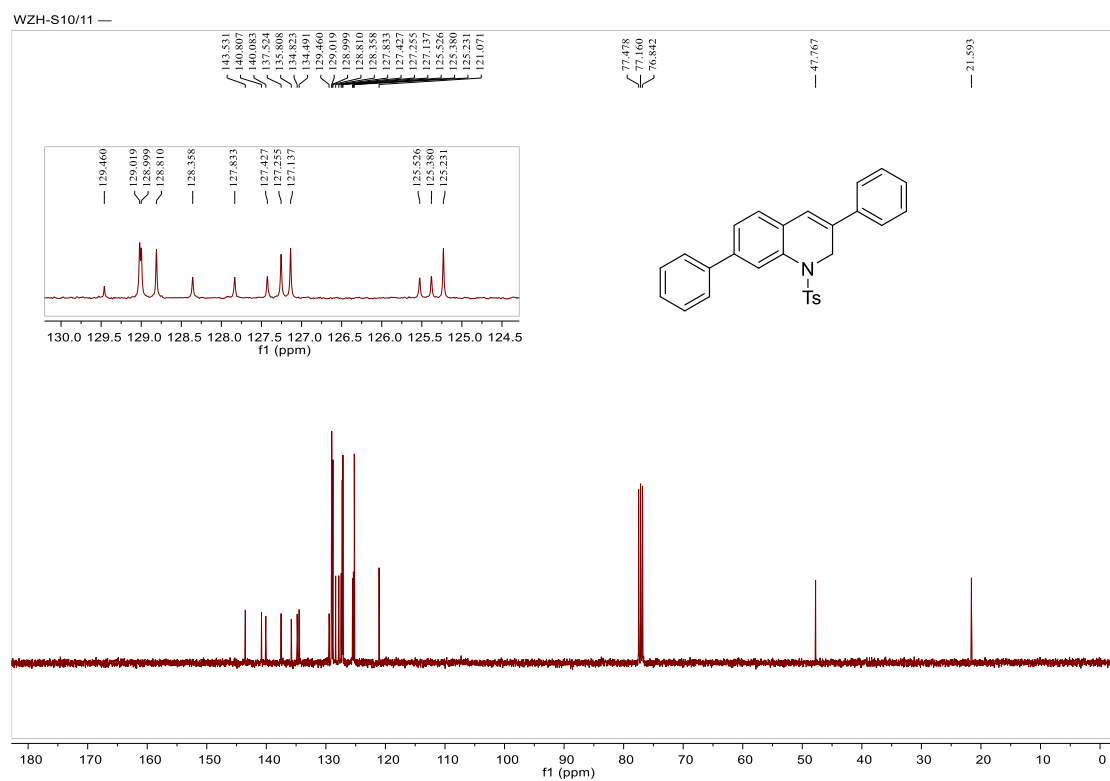

Supplement: d3qo00784g1.pdf [file d3qo00784g1.pdf]
